# Supplementary material for: Phosphoinositides regulate force-independent interactions between talin, vinculin, and actin
Source: eLife. 2020 Jul 13;9:e56110. doi: 10.7554/eLife.56110 (PMC7384861; doi:10.7554/eLife.56110)
Supplement: Figure 1—source data 1. [file elife-56110-fig1-data1.xlsx]

## Sheet: Sheet1
Actin alone							Talin2					Vinculin					Vinculin2A					Talin2 + Vinculin					Talin + Vinculin2A
Actin_1	Actin_2	Actin_3	Actin_4	Actin_5			Raw Actin	Est. Actin filaments	Tn2 enrich	Vn enrich		Raw Actin	Est. Actin filaments	Tn2 enrich	Vn enrich		Raw Actin	Est. Actin filaments	Tn2 enrich	Vn enrich		Raw Actin	Est. Actin filaments	Tn2 enrich	Vn enrich		Raw Actin	Est. Actin filaments	Tn2 enrich	Vn enrich
65.4691	40.831	31.6425	24.3321	36.3361			45.7685	1.10021	1.02498	0.898239							30.9942	0.745052	1.03887	1.31697		24.4751	0.588344	1.12271	1.22683		31.093	0.747428	2.47804	2.29285
25.7631	70.0996	33.8035	45.8267	44.3391			27.4218	0.659177	0.99331	1.09238		27.2667	0.65545	1.07873	1.05535		33.92	0.815385	1.13329	1.28772		51.3539	1.23447	1.21018	1.73185		16.2623	0.390921	2.42461	2.60201
94.0148	53.2905	32.8353	22.426	21.27			46	1.10577	1.00598	0.921533		43.2587	1.03987	0.988583	1.08683		27.0197	0.649512	0.914664	1.239		66.7241	1.60395	1.19628	1.50956		20.1984	0.485539	2.15018	2.08062
32.9195	28.7846	55.7425	24.7767	63.8099			37.1225	0.892368	1.07967	1.00112		32.4109	0.779108	1.0331	1.0597		25.1249	0.603963	1.10938	1.39794		66.4782	1.59803	1.11187	1.65163		38.3453	0.921761	2.7249	1.89856
35.1555	48.7395	56.5382	32.5185	30.6154			54.9887	1.32184	1.01371	1.10861		29.6007	0.711555	3.29857	1.05171		25.9687	0.624247	1.16661	1.25151		67.9011	1.63224	1.13436	1.47526		29.2356	0.702778	2.53195	2.71948
60.6979		72.5254	34.1137	25.5214			37.8742	0.910437	1.0872	0.916028		21.9722	0.528178	1.03266	1.08534		25.6444	0.616452	1.13337	1.27478		76.5659	1.84053	0.900961	1.34219		94.8245	2.27944	4.33521	4.04185
21.3802		35.9812	20.2409	28.596			52.0862	1.25207	1.00368	0.989211		21.5662	0.518419	1.05466	0.95137		82.9194	1.99325	1.25113	1.86516		50.6691	1.21801	1.07239	1.41583		42.5278	1.0223	3.29142	2.96571
36.3416		36.0199	61.8183	42.6396			41.5984	0.999961	0.994765	0.976422		27.7522	0.667119	1.12117	0.970452		49.9067	1.19968	1.10923	1.7592		40.112	0.96423	0.990946	1.69758		35.4815	0.85292	1.64545	2.0806
		27.5848	47.916	29.2149			31.4667	0.756411	0.982788	0.917544		34.4726	0.828667	1.07335	0.987051		90.9866	2.18718	1.17466	1.91939		35.5796	0.85528	1.12335	1.46275		71.5701	1.72044	2.68834	2.77597
		37.7087	51.5918	49.0081			42.2618	1.01591	1.04758	1.03535		26.7327	0.642613	1.02338	1.14648		49.0492	1.17907	1.12269	1.35823		33.395	0.802765	1.09154	1.27111		111.022	2.6688	5.60014	4.76938
		86.2459					20.8389	0.500935	1.01871	0.912473		31.7411	0.763006	1.03911	0.912572		44.4166	1.06771	1.14616	1.47661		49.7237	1.19528	1.13052	1.28633		55.8485	1.34251	1.88766	1.98801
		35.8685					86.3848	2.07656	0.978097	1.02349		35.946	0.864087	1.02277	1.14708		32.6365	0.784532	1.17656	1.13179		67.5432	1.62363	1.14034	1.44405		76.1582	1.83072	3.52538	3.1358
							30.6756	0.737394	1.01806	1.01163		37.3669	0.898244	1.0471	1.21216		42.3778	1.0187	1.10229	1.26195		78.4037	1.8847	1.21577	1.38213		56.0914	1.34835	3.69738	2.66342
							47.7849	1.14868	0.959495	1.0107		127.65	3.0685	1.07735	1.3683		86.3246	2.07511	1.23264	1.49386		81.8707	1.96805	1.20473	1.66925		71.6422	1.72217	2.74801	2.92414
46.4677	48.349	42.5193	34.8854	35.8158	mean		35.5334	0.854167	1.02807	1		27.7053	0.665993	0.989037	0.974568		25.3731	0.609929	1.07035	1.19609		33.0423	0.794286	1.11315	1.29339		43.4802	1.0452	3.78582	4.10236
24.7744	15.3048	15.28	14.1613	12.9588	stdev.		28.15	0.676683	0.9589	1.31175		35.9618	0.864465	0.940154	1.01129		49.657	1.19368	1.04547	1.07539		47.9981	1.1538	0.860955	2.15449		38.8032	0.932769	4.28934	2.35938
							54.2089	1.3031	1.02521	0.893193		35.4309	0.851704	1.0398	1.18605		38.4574	0.924456	1.0402	1.59298		34.1365	0.820589	1.70704	2.12538		35.75	0.859375	1.93267	2.1798
41.6074	average						32.5768	0.783095	0.955487	0.987562		37.9025	0.911118	0.941772	0.920521		27.6964	0.66578	1.08133	1.41518		68.022	1.63514	1.14457	2.08806		51.184	1.23038	1.94491	2.37313
4.72737	stdev.						56.693	1.36281	0.965769	1.01293		44.4762	1.06914	2.7551	0.957014		34.0074	0.817485	1.0559	1.29062		59.1886	1.4228	1.24558	1.67697		37.8261	0.909282	1.64003	1.50759
2.11414	SEM						76.8542	1.84746	0.980903	1.04105		31.416	0.755193	1.02331	1.05094		29.8025	0.716406	1.07786	1.28263		37.8423	0.909671	1.10132	1.31947		43.2173	1.03888	2.62799	2.8238
							37.3949	0.898917	1.00134	1.06388		23.8163	0.572507	0.981789	0.993286		38.043	0.914495	0.985395	1.15663		17.5403	0.421641	0.975074	1.0334		33.116	0.796058	2.66463	2.6302
41.6	intensity per filament						67.0773	1.61244	0.943725	1.0163		37.879	0.910552	1.00441	0.986897		36.0373	0.866282	1.01139	1.30331		43.1737	1.03783	0.963376	2.73598		93.043	2.23661	1.86767	2.5079
							39.279	0.944208	0.981537	0.999299		22.4785	0.540348	0.919412	1.13726		40.6349	0.976801	1.04278	1.30715		49.0313	1.17864	1.04181	1.38443		46.4666	1.11699	1.29171	1.72464
							54.2156	1.30326	0.986889	1.02606		103.497	2.48791	1.16621	1.99094		41.5137	0.997925	1.14208	1.25768		49.3633	1.18662	1.1678	1.18438		331.858	7.97737	2.57408	3.79959
							28.5296	0.685807	1.0225	0.975754		34.9185	0.839387	1.01137	1.08859		39.8315	0.957487	0.966992	1.35262		36.6447	0.880883	0.956172	1.41898		52.2796	1.25672	1.15379	1.44344
							35.7334	0.858975	1.03306	1.0515		76.9541	1.84986	1.00401	1.2581		218.798	5.25957	1.49814	2.62643		36.1911	0.869979	1.25191	1.4267		125.312	3.0123	1.63593	2.33393
							46.3831	1.11498	1.00096	1.07903		37.2785	0.896118	1.0569	1.12818		89.1986	2.1442	1.29188	1.42514		26.8462	0.64534	1.13355	1.52518		128.631	3.0921	2.87186	2.77057
							33.3866	0.802562	1.02991	0.988618		30.4968	0.733095	1.10853	1.12141		57.7141	1.38736	1.03926	1.10068		30.7393	0.738925	1.14165	1.44337		29.0469	0.698242	1.09866	1.05941
							54.4721	1.30943	0.965799	0.984915		51.417	1.23598	0.936357	1.14804		47.3238	1.13759	1.04023	1.60631		80.8667	1.94391	1.28589	1.66346		197.785	4.75444	3.21371	4.36099
							21.0758	0.506629	0.849731	0.980363		21.9002	0.526448	1.02476	1.24435		32.8977	0.79081	1.00911	1.19804		50.8836	1.22316	1.35672	1.09056		180.073	4.32868	2.8974	3.82578
							53.878	1.29514	1.09839	0.989451		50.7739	1.22053	1.07414	0.411888		60.4217	1.45245	0.947206	1.21938		71.3092	1.71416	0.976182	1.32		123.627	2.9718	2.83438	3.3707
							29.7606	0.7154	1.08842	0.986393		55.4195	1.3322	1.01702	1.11952		41.4556	0.996528	1.05428	1.22361		24.6195	0.591815	1.05394	1.32261		472.523	11.3587	3.04413	4.9002
							26.5174	0.637438	1.10025	1.01178		55.073	1.32387	0.980911	1.11377		42.3867	1.01891	0.981496	1.22805		46.0624	1.10727	1.18114	1.22864		193.414	4.64937	2.21344	3.09491
							25.9772	0.624452	0.997262	1.02655		80.1254	1.92609	0.988409	1.32965		69.3461	1.66697	1.12657	1.17086		227.742	5.47457	3.14576	2.7068		191.452	4.60222	2.52785	3.70454
							47.8875	1.15114	1.10544	0.995472		35.4127	0.851267	1.01726	1.02816		41.3486	0.993956	1.1841	1.80043		37.2333	0.895031	1.16266	1.24295		103.897	2.49752	2.43975	3.10938
							44.2664	1.0641	0.877468	0.987854		27.5125	0.661358	0.978539	1.09696		78.9848	1.89867	1.06736	1.47902		149.802	3.601	1.27078	2.74347		36.4131	0.875315	1.74613	1.57812
							44.4441	1.06837	1.01263	0.998843		41.126	0.988605	1.16669	1.06826		46.5574	1.11917	0.958679	1.04973		92.2503	2.21756	1.03242	1.28943		44.6803	1.07405	1.23053	1.51649
							45.8912	1.10315	0.902583	0.986164		39.7465	0.955445	1.04823	0.93634		19.9951	0.480651	0.953626	1.01648		17.2387	0.414391	1.08301	1.19216		52.8963	1.27155	1.62071	1.45258
							12.4986	0.300446	0.908504	1.03591		52.8007	1.26925	1.08976	1.50205		24.8121	0.596444	1.01292	0.896642		34.663	0.833245	1.05609	1.2504		40.3755	0.970564	1.37783	1.52933
							19.2735	0.463304	1.0247	1.05451		45.8687	1.10261	0.914785	1.09102		29.2327	0.702708	0.989144	1.25773		42.8371	1.02974	2.72492	2.57044		39.1203	0.940393	1.99146	1.77021
							17.0062	0.408803	0.998423	0.985437		30.7132	0.738298	1.02495	1.0929		26.1079	0.627593	1.05715	1.29559		28.3605	0.681742	1.12122	1.50389		50.7186	1.2192	1.27179	1.42082
							42.0798	1.01153	1.01024	0.957404		40.3836	0.97076	1.0352	1.10589		42	1.00962	0.986697	1.21631		65.1132	1.56522	0.969566	1.59294		47.3185	1.13746	1.19757	1.37586
							27.3532	0.657528	0.964163	1.03953		40.4894	0.973302	1.1373	1.30626		44.0102	1.05794	1.31039	1.02756		27.5444	0.662125	0.984359	1.26181		264.837	6.36628	2.48766	3.07717
							20.4883	0.492508	1.21297	0.962585		47.0167	1.13021	1.40078	1.72316		22.7379	0.546584	1.01249	1.21825		38.288	0.920384	1.01827	1.62419		228.664	5.49674	2.10583	2.23278
							38.1779	0.917738	1.01334	1.06617		27.7814	0.667823	1.01884	1.00785		27.9605	0.672126	1.05052	1.28277		31.8787	0.766316	1.1617	1.39861		305.732	7.34934	2.95499	3.11891
							37.4356	0.899895	0.998861	1.01082		92.2062	2.2165	1.33506	1.83586		177.3	4.26201	1.26538	2.35346		48.8761	1.17491	1.16186	1.50222		243.369	5.85022	2.65365	2.6934
							47.5708	1.14353	0.920314	0.936437		38.7889	0.932425	0.997073	1.10922		61.6952	1.48306	1.13136	1.23893		18.81	0.452164	1.07928	1.38158		219.51	5.27668	1.93143	1.98705
							24.2519	0.582978	1.10049	1.10269		45.4925	1.09357	1.03485	1.05926		35.0527	0.842614	0.985114	1.18697		33.3606	0.801938	1.01022	1.18276		321.404	7.72607	1.76359	1.74863
							22.5698	0.542543	0.999686	1.01744		56.6755	1.36239	0.927893	1.06748		47.1345	1.13304	1.05233	1.20827		41.5565	0.998954	1.23322	1.62226		327.781	7.87936	2.6699	2.81466
							56.7118	1.36326	0.961651	0.930619		62.685	1.50685	1.04903	1.16815		52.0971	1.25233	1.06737	1.61071		30.2441	0.727022	1.28025	1.42963		161.97	3.8935	2.01341	2.16694
							35.7054	0.858304	1.00406	1.00104		82.2895	1.97811	1.03969	1.07581		26.6011	0.63945	1.06608	1.12629		23.3396	0.561048	1.12236	1.27057		64.7179	1.55572	1.48496	1.58206
							25.1211	0.603874	1.01604	0.98513		40.1935	0.966189	1.07454	1.05906		30.1666	0.72516	0.954517	1.01458		42.3026	1.01689	4.25104	1.69752		65.8949	1.58401	1.28222	1.35543
							57.2635	1.37653	0.922121	1.02715		28.7004	0.689913	1.12425	1.11854		33.4591	0.804306	0.988485	1.1238		26.2387	0.630737	1.05807	1.17021		78.5412	1.88801	1.3249	1.23593
							23.425	0.563101	1.0361	1.0657		28.8489	0.693482	1.01246	1.02405		39.4295	0.947825	1.11577	1.11948		74.4332	1.78926	1.35555	2.00846		61.3296	1.47427	1.30458	1.48071
							53.7777	1.29273	1.5396	1.03338		52.8542	1.27053	1.12781	1.03182		33.2031	0.798151	1.09484	1.21524		31.4719	0.756537	1.65367	1.84581		78.6044	1.88953	1.44185	1.76909
							45.6813	1.09811	0.993596	0.937358		27.6535	0.664748	0.921391	1.01209		37.3333	0.897435	1.01354	1.10394		21.208	0.509808	0.990314	1.23646		130.136	3.12826	2.05638	1.54447
							26.7916	0.644028	0.822058	0.962982		52.6741	1.2662	1.05782	1.05358		39.8536	0.958019	1.06366	1.54807		29.1678	0.701149	0.977542	1.22604		102.115	2.45468	1.4815	1.84095
												49.2317	1.18345	1.00456	1.01382		28.0296	0.673789	1.08901	1.06595		31.1111	0.747864	0.999183	1.43233		105.754	2.54217	1.99887	2.34194
												25.9411	0.623584	0.956762	1.00651		41.2844	0.992413	1.02329	1.52955		23.3167	0.560499	0.906377	1.13105		67.1385	1.61391	1.43865	1.05433
												39.0989	0.939878	0.979083	1.02104		22.4625	0.539964	0.970441	1.23946		19.7111	0.473825	1.01589	1.21526		33.3444	0.801549	1.19146	1.27827
												41.5124	0.997895	1.00431	0.940538		33.218	0.79851	1.0641	1.31901		32.5902	0.783417	1.23375	1.23135		52.3132	1.25753	1.23014	1.36184
																	26.7589	0.643242	1.17404	1.52481		37.7188	0.906703	1.1042	1.31748		388.336	9.33499	5.31043	8.05999
																	71.9777	1.73023	1.08643	1.60893		28.9616	0.696193	0.919552	1.22677		18.2912	0.439692	1.39497	1.96796
																	39.1093	0.940128	1.13415	1.48783		70.9365	1.7052	1.04809	1.27519		121.618	2.92351	2.24811	3.60975
																	74.0198	1.77932	1.09279	1.50432		47.8078	1.14923	0.996252	0.943375		69.4515	1.66951	2.21688	3.93469
																	40.7801	0.980292	1.09562	1.26434		48.208	1.15885	1.11642	1.68355		77.5237	1.86355	2.10274	2.23833
																	35.2661	0.847742	1.09162	1.38381		45.5376	1.09465	0.985069	1.24222		98.5856	2.36985	2.48861	3.84557
																	23.2773	0.55955	1.04291	1.43973		38.3187	0.921122	1.02308	1.23113		117.025	2.8131	2.32428	4.92686
																	51.8198	1.24567	0.982779	1.4116		11.8166	0.284053	1.11778	1.16948		58.3048	1.40156	1.77788	3.39016
																	56.9709	1.36949	1.08021	1.25026		86.1398	2.07067	1.22497	1.66089		95.7706	2.30218	2.45432	4.8673
																	26.775	0.643629	1.07807	1.30019		41.2722	0.992121	0.932436	1.14799		120.354	2.89312	1.7984	2.48787
																	17.8383	0.428804	1.0634	0.353091		34.0967	0.819633	0.852672	1.26509		35.5192	0.853826	1.43435	2.54096
																	99.4502	2.39063	1.33033	2.55715		45.5111	1.09402	1.04852	1.44418		98.0224	2.35631	2.57699	3.68578
																	32.0857	0.77129	1.01983	1.14357		27.4133	0.658974	0.920457	1.40612		70.6926	1.69934	2.28312	2.95605
																	33.7038	0.810187	1.1735	1.67018		29.3284	0.705009	1.00814	1.3342		119.644	2.87607	3.62971	5.15063
																	103.424	2.48615	1.28911	2.40927		75.5818	1.81687	1.43508	1.94304		69.1913	1.66325	1.80315	3.08589
																	27.9457	0.671772	1.07816	1.18247		20.0921	0.482983	0.954516	1.03823		34.237	0.823006	1.62134	2.19081
																	22.4549	0.539781	1.10104	1.29827		53.8492	1.29445	0.945071	1.01327		30.0391	0.722093	1.83162	2.46129
																	103.82	2.49567	1.19454	1.81575		53.3031	1.28132	1.12673	1.31356		38.9959	0.937402	2.22175	2.4675
																	52.4784	1.2615	1.00514	1.33275		92.015	2.2119	1.40392	2.33531		90.2052	2.16839	2.32895	3.3748
																	46.8443	1.12606	1.07584	0.988634		49.9547	1.20083	1.38973	1.93549		110.074	2.64602	3.26918	3.39103
																	66.0477	1.58769	1.08893	1.20002		52.9635	1.27316	1.04552	1.12367		75.2425	1.80871	2.79729	4.42023
																	28.6082	0.687697	1.04683	1.1543		98.6616	2.37167	0.998569	1.50465		80.9333	1.94551	3.33715	4.15051
																	61.6889	1.48291	1.12307	1.31858		26.2133	0.630126	0.991673	1.19303		47.7204	1.14713	1.56638	3.45174
																	35.1868	0.845837	1.17861	1.38572		23.8688	0.573769	1.39968	1.34876		108.463	2.60729	2.75868	0.338088
																	45.5762	1.09558	1.04564	1.26435		30.6334	0.736379	1.08944	1.00239		121.08	2.91058	1.74583	2.32554
																	43.0258	1.03427	1.01574	1.30061		63.0623	1.51592	1.10246	1.07096		72.6416	1.74619	2.36128	2.35706
																	31.4222	0.755342	0.987543	1.23644		26.6154	0.639792	0.885221	1.1659		116.636	2.80374	1.55555	2.52883
																	33.5476	0.806433	1.12812	1.31969		48.3328	1.16185	0.947913	1.43469		162.245	3.90012	4.16609	6.23339
																	58.3751	1.40325	1.29525	1.80084		15.9867	0.384295	0.883586	1.36696		40.3932	0.97099	1.27683	1.89637
																	34.9992	0.841327	1.00808	1.18276		89.9	2.16106	1.09797	1.39762		58.4613	1.40532	1.94259	3.28687
																	21.8923	0.526257	1.01369	1.22472		53.5243	1.28664	1.073	1.68556		129.34	3.10913	4.02644	5.17832
																	47.9757	1.15326	1.13541	1.6437		41.3486	0.993956	1.05825	0.950657		64.9885	1.56222	2.19789	2.45681
																	33.7038	0.810187	1.1735	1.67018							140.132	3.36857	2.07198	3.21692
																	103.424	2.48615	1.28911	2.40927							82.7449	1.98906	2.15244	2.34644
																	27.9457	0.671772	1.07816	1.18247							70.8311	1.70267	2.52706	3.98904
																	22.4549	0.539781	1.10104	1.29827							63.746	1.53236	1.48001	1.7087
																											97.8942	2.35323	1.99444	2.04641
																											134.917	3.2432	1.94565	2.39786
																											74.0581	1.78024	1.41962	3.16458
																											73.2235	1.76018	1.47808	2.57259
																											158.682	3.81448	5.96034	7.76018
																											49.3926	1.18732	1.54533	2.15588
																											69.979	1.68219	1.95678	2.74502
																											116.525	2.80108	2.58449	4.47731
																											38.4986	0.925447	2.04873	2.53797
																											110.505	2.65638	2.23946	3.56835
																											33.4952	0.805174	1.14116	1.78326
