# Supplementary material for: Phosphoinositides regulate force-independent interactions between talin, vinculin, and actin
Source: eLife. 2020 Jul 13;9:e56110. doi: 10.7554/eLife.56110 (PMC7384861; doi:10.7554/eLife.56110)
Supplement: Figure 2—source data 1. [file elife-56110-fig2-data1.xlsx]

## Sheet: Filament_per_bundle
Actin alone	Tn2 Vn2A - 0.5uM	Tn2 Vn2A - 1uM	Tn2 Vn2A - 1.5uM
0.645719	1.98819	1.63577	2.59401
1.35332	2.42726	2.49642	3.85414
0.657648	0.658752	1.89691	5.3515
1.11157	3.36057	1.28701	5.00022
0.992733	1.68089	2.17206	3.67338
1.21151	2.99046	4.54414	3.26872
1.27732	0.995223	1.7815	2.12448
0.723125	1.26954	1.32958	3.65022
1.18793	3.02782	1.33245	1.75953
1.24443	2.5042	3.2594	1.1833
1.21301	0.790989	1.49361	2.73161
0.562243	0.47552	0.864668	2.73322
1.66495	1.38793	1.41683	1.94375
0.811147	1.0455	0.922343	3.83324
0.895567	1.06962	1.37232	1.03307
0.922343	1.01678	1.64489	1.34481
0.810373	1.78337	1.52241	7.13341
0.853109	2.3629	3.08324	4.25627
0.956055	2.80688	1.81744	2.62604
0.807213	1.66905	1.55319	3.57668
0.921613	1.01982	1.65966	2.99204
0.970793	0.747602	2.12824	2.84583
1.05122	2.7092	0.912807	4.6512
1.21216	0.846411	1.26775	7.69409
1.12612	4.77567	0.953916	3.53891
0.827188	4.32142	1.97477	1.55778
0.984052	1.33061	0.897973	2.54911
0.777561	1.12775	1.01879	2.45015
0.704425	0.86542	1.54738	2.97003
1.62022	1.15436	3.95872	1.30063
0.965608	1.02703	3.1054	1.5294
1.10149	0.802907	0.889627	1.48294
1.22083	3.89698	0.889627	2.26057
0.781948	0.76385	0.889627	3.27886
1.42202	2.28397	1.31411	9.153
0.850752	1.28231	1.67204	1.41008
1.00522	0.519896	1.78774	4.65599
1.03113	1.15189	1.66757	2.05113
0.623267	1.24337	2.01743	3.76204
0.818422	1.04887	1.76311	1.82843
0.650319	2.7805	2.70073	4.43373
0.990763	1.81698	3.96989	3.66226
0.686153	2.97458	3.19529	1.04706
0.93451	1.10522	1.24454	0.645196
0.863717	0.690929	1.24454	1.35506
1.166	1.99625	1.87142	1.61916
0.642098	0.717035	0.878899	1.52672
0.758327	0.757316	1.68365	2.41117
0.697403	2.05329	1.92024	1.01518
0.911439	2.69058	2.31026	4.30305
0.977294	1.33992	1.89689	3.91695
0.923875	2.6234	3.7021	3.59507
0.650319	1.15768	0.746025	1.29624
0.990763	1.00823	1.96288	5.09975
0.686153	1.26625	3.03174	3.41842
0.93451	3.49104	1.34324	1.04286
0.863717	0.79009	2.26893	3.85433
1.166	1.17617	1.22156	3.73436
0.642098	0.622422	1.82943	1.9746
0.758327	1.31192	0.579123	1.6076
0.697403	0.804722	2.09607	5.69619
0.911439	0.480251	1.35532
0.977294	2.83443	0.856215	1.30842
0.923875	3.0433	0.611114	2.44684
1.02929	1.04057	1.51226	4.3552
1.83809	3.06796	0.725651	3.27226
1.03547	1.60274	1.18778	1.56063
2.13381	2.91668	1.4119	2.06022
1.02929	2.26417	0.781221	2.74713
1.17077	2.52666	1.01528	2.56839
0.937542	2.70966	0.815717	1.70135
0.817439	0.950286	1.23251	2.5138
1.57104	1.35404	3.74768	2.49402
0.61667	2.99954	0.807956	3.92853
1.08659	1.746	1.41356	1.62732
0.73615	1.07811	0.968918	5.32842
1.70436	0.985559	0.740008	2.8988
1.06485	1.22735	1.12383	2.08924
0.71748	0.934349	1.52477	2.06769
0.819779	1.2624	1.82764	1.6793
1.96215	2.28893	1.23206	6.05038
1.25837	3.47357	2.05029	4.17139
1.12643	0.557112	1.08386	1.15655
0.744834	0.361496	1.13828	7.25567
0.796902	2.83873	1.22001	2.09713
1.61332	1.3848	4.05578	3.59673
1.17974	2.19747	0.740014	0.89461
0.508463	1.26614	1.1749	2.00182
0.628474	1.19529	1.09787	1.50968
0.583005	2.74491	1.15786	1.24069
0.83197	2.41708	2.72368	1.46427
0.364098	0.729447	1.62828	9.12005
0.83676	1.09279	0.987553	1.8901
1.36006	6.44733	1.86818	2.48203
0.589136	0.682147	1.86818	3.25022
1.37817	1.26885	1.97917	5.5427
1.49726	1.9337	0.920343	4.32916
1.18676	5.78256	2.76305	2.92373
0.717185	0.533589	1.0545	1.80321
1.28257	0.72754	2.37505	2.79624
1.53252	2.0269	0.59594	2.34799
0.877687	0.746038	0.508553	6.11948
1.12483	1.6666	0.83288	1.20461
1.00116	0.987777	1.16614	0.913351
0.628888	2.23601	1.13507	1.86647
0.743937	1.7956	0.471005	1.43705
1.2514	0.764804	0.81633	14.235
0.821071	1.57556	2.40927	2.7544
1.10536	1.38701	1.11762	1.95317
0.89564	0.82345	1.58313	3.23071
1.51354	1.16561	3.98728	4.46956
1.53165	1.16774	2.2985	1.93832
0.948741	0.402763	2.2985	3.23954
1.3526	2.00901	2.32135	2.10816
1.30183	1.82678	2.84007	3.05866
0.724278	1.43418	1.00757	1.87738
0.83288	1.36088	1.65974	1.8404
	1.89021	1.92189	4.39493
	4.35294	1.73774	4.04292
	0.672703	0.899864	3.65877
	0.666365	0.93042	2.72266
	1.30383	2.16274	3.79864
	1.33951	2.84689	2.62558
	1.71786	2.23053	3.14351
	0.439384	1.32035	2.7216
	0.980954	1.78778	11.9832
	1.17302	0.969226	3.38948
	2.04228	0.558139	3.40894
	0.762262	1.07611	1.90645
	1.03888	3.20093	1.28847
	0.554343	2.53198	5.79292
	3.96572	9.81289	5.39267
	0.705008	1.45262	2.10695
	0.760842	1.35613	1.22237
	0.475371	2.00613	1.78002
	1.08447	0.929101	10.016
	2.87864	1.67938
	1.07221	1.36786
	1.0881	2.32981
	0.923553	1.48371
	2.23561	6.6833
	1.09272	2.31704
	0.98536	1.59807
	2.82698	1.48986
	2.2247	1.01174
	0.743218	0.827362
	0.940245	1.50372
	0.852406	1.1319
	1.17249	2.4558
	1.20451	1.95098
	1.56258	2.0386
	2.05423	0.743553
	2.00236	2.5869
	0.738875	1.56162
	1.08782	1.18841
		2.58663
		0.994433
		2.20587
		1.01439
		0.581866
		0.488106
		3.59766
		0.586104
		1.53406
		1.3079
		1.69059
		1.25655
		1.02528
		0.647395
		2.1758
		1.48828
		6.4155
		0.867719
		1.16273
		1.19361
		1.38091
		1.46257
		0.655842
		1.93165
		1.65018
		1.87928
		1.33268
		1.23941
		0.99455

## Sheet: percent_area_w_actin_signal
Actin alone	Tn2 Vn2A - 0.5uM	Tn2 Vn2A - 1uM	Tn2 Vn2A - 1.5uM
25.3498	8.33985	4.75983	7.93888
29.4582	8.61511	5.21784	7.19702
30.0495	8.61511	5.01412	6.65578
30.5808	9.23912	4.10272	7.06672
29.3003	9.86671	5.72546	7.3305
24.4845	10.9806	4.07192	6.62554
28.4142	13.4613	5.43118	8.86193
28.2123	11.1004	5.802	8.80585
24.4428	11.5246	4.87024	8.82368
30.6011	10.4103	6.42162	6.98394
25.5711	10.0826	6.32829	9.3841
27.8078	12.5841	4.83652	7.53746
29.2622	10.4394	5.62815	9.07631
26.8192	10.0597	6.19799	5.53367
41.3578	9.90562	6.27031	9.04619
44.4719	8.93694	6.85144	2.93882
40.1056	10.05	7.84147	4.29153
31.5904	11.6423	6.43332	4.86866
31.2	7.78732	4.53682	4.99819
41.2122	12.9507	3.80414	3.99119
28.6917	13.9913	4.84024	4.67872
32.0736	8.35638	6.24165	3.85323
42.1286	13.2179	3.68434	4.50988
29.1168	12.8766	4.62837	4.38716
40.3658	11.7924	3.61174	6.29393
40.261	14.5154	6.36141	5.42481
39.7793	12.1005	4.30336	5.63091
26.302	12.7781	5.28716	4.35234
30.4891	11.1314	5.46919	6.31182
35.6275	13.3165	10.5315	5.30708
40.8415	13.9059	9.51294	4.16718
	14.0277	7.19122	3.14074
	12.7784	9.31549	5.85053
	11.515	7.33465	4.62272
		5.98737	5.59938
		5.36675	4.89342
		7.29068	5.37742
		6.41327	5.41708
		6.99404	5.33341
		6.67419	5.12941
		7.5208	5.24258
		6.33579	5.81295
		6.97814	5.85513
		7.61149	4.24249
		6.84814	5.53329
