# Supplementary material for: Phosphoinositides regulate force-independent interactions between talin, vinculin, and actin
Source: eLife. 2020 Jul 13;9:e56110. doi: 10.7554/eLife.56110 (PMC7384861; doi:10.7554/eLife.56110)
Supplement: Figure 3—figure supplement 4—source data 1. [file elife-56110-fig3-figsupp4-data1.xlsx]

## Sheet: Filaments_per_bundle
Actin alone	Tn2+Vn2A	Tn2ABS2+Vn2A	Tn2ABS3+Vn2A	Tn2ABS2/3+Vn2A	Tn2NtoR3+Vn2A
0.578921	2.88514	1.0465	2.81565	2.39882	1.37576
0.465679	1.027	4.02281	3.94834	2.07672	1.33228
0.494705	5.16328	2.93016	2.34943	3.01022	1.07342
0.859917	1.26517	1.00447	2.79911	10.347	0.856843
1.19162	3.31009	2.19263	1.52234	1.85883	0.698994
0.570869	1.45638	1.35238	12.4768	1.11817	0.680745
1.92674	0.459467	1.62872	2.43507	2.63065	1.18416
1.20515	1.3384	2.357	0.878949	1.50999	1.14694
1.1124	1.31502	6.74777	0.997052	0.453562	1.90016
0.753671	1.597	1.97721	1.92606	1.25428	1.00984
1.08063	2.51463	1.91059	1.06607	0.981478	0.752251
0.957168	0.901828	1.84027	1.06845	2.39882	1.39889
1.45637	2.57029	1.22975	2.91142	1.07487	1.03438
0.77442	2.65534	1.0698	2.3194	1.72439	6.58964
0.983411	1.2102	1.9382	1.40368	1.14582	0.934245
0.977778	1.73844	1.87837	2.62801	1.34691	1.04304
0.675105	0.835443	5.80163	2.33759	1.63305	0.336038
1.56116	1.2176	0.896884	1.48497	1.19663	0.541148
1.73129	0.874733	1.7255	3.00704	1.70239	0.91753
0.714503	2.64915	1.09934	1.10661	1.82145	0.605843
1.46923	1.6035	1.93549	1.46029	4.09056	0.454113
1.29439	1.53483	1.51355	1.86733	2.80506	1.41266
0.842087	2.95129	1.02055	3.72686	9.54788	5.00588
0.448726	7.13257	2.69156	5.21005	2.23312	1.10221
0.744444	2.40056	2.13379	0.737704	3.43835	10.0746
1.03887	0.652697	1.65209	1.02105	1.86397	2.02532
0.562805	1.54901	2.11612	3.27014	1.97696	2.06325
1.44679	2.02713	1.75402	2.03882	3.797	1.16234
1.10501	5.11607	0.883444	3.55342	0.966089	1.92935
1.33475	0.990328	1.95481	4.68185	1.66681	3.20133
1.17523	3.61501	31.6432	1.66802	0.663797	1.29853
1.18481	0.795151	2.21204	2.84905	1.85784	0.808188
1.07117	1.94986	3.58475	0.706645	3.60438	1.47088
0.559915	0.888479	22.1692	4.28427	1.62799	3.24511
0.653608	1.24492	5.04818	2.40118	1.73132	3.42233
	1.21471	3.61519	1.79234	0.777979	0.85611
	2.41174	1.47089	1.21214	2.55922	7.17784
	5.46381	2.22475	0.806458	0.971666	1.43273
	5.18976	1.03636	0.907178	1.76813	1.66821
	0.977743	1.59478	7.45525	1.33958	1.02176
	1.08238	1.12096	0.608292	2.43995	0.77192
	7.51298	4.05422	1.33674	1.17882	0.749604
	0.771004	7.00253	0.794905	2.39882	1.28719
	4.54886	5.834	1.2673	2.8112	0.90337
	2.29194	1.3105	1.42488	2.69928	1.63036
	2.04609	1.72981	2.55724	2.82699	1.11646
	1.22718	1.57061	2.12184	1.22447	0.601547
	10.8358	0.566985	1.61359	2.31109	0.95176
	3.68304	3.6471	1.13944	0.820441	1.35222
	5.50806	1.01828	2.61289	1.232	1.20785
	3.20737	2.93326	2.46716	1.68695	1.14969
	1.72067	0.808194	1.32421	2.22969	1.59993
	0.570705	3.71733	8.009	2.20624	2.66138
		1.29789	1.86518	1.28459	1.34315
		2.57746	6.60457	0.690771	1.68861
		2.18637	2.6111	4.80608	1.44211
		3.09737	1.83659	1.46371	3.01785
		3.84855	1.69718	5.69055	1.30245
		4.5502	2.82324	4.83257	1.45398
		2.71182	3.15687	0.925112	1.57506
		3.51899	4.07884	1.15616	1.74296
		4.43042	1.63061	2.62702	1.62052
		2.51957	1.76437	2.72971
				1.9569
				0.775537
				2.44015
				3.32247
				4.44503
				2.79876
				2.13836
				1.86403
				2.39882
				4.12862
				6.29177
				4.57969
				1.22672
				1.70467
				3.29523
				4.89589
				1.17124
				1.46089
				3.8643
				2.17201
				2.41221
				0.986524
				0.926177
				2.05809

## Sheet: Talin_enrichment_at_filament
WT <1	2 <1	3 <1	23 <1	NtorR3 <1		WT 1-2	2 1-2	3 1-2	23 1-2	NtoR3 1-2		WT>2	2 >2	3 >2	23 >2	NtoR3 >2
1.35233	3.26412	1.19113	1.46043	1.42672		1.75328	1.61711	1.63398	1.92992	2.4755		1.34974	2.29566	2.2524	1.79528	2.73697
0.936362	1.99708	1.56803	2.19423	1.08216		1.16706	3.11161	1.47011	3.18803	1.84666		1.47047	3.88291	2.63768	3.44321	3.91027
1.54249	3.86438	1.14182	1.15544	2.45384		1.33443	2.12072	1.14736	3.01595	1.50507		2.65359	3.18051	2.03619	2.26411	3.53833
0.959377	1.36867	1.39888	1.64549	1.62735		1.69605	2.20827	1.19706	3.98501	2.12803		1.89917	2.65017	1.2918	3.68502	2.65287
1.13457	2.74153	1.13444	1.4278	3.00274		1.26365	2.35438	1.09767	6.82599	3.35006		3.20543	2.43282	2.62869	3.01463	3.02679
2.3482	2.66279	1.54877	2.85151	1.26308		1.32088	2.271	1.23479	1.67505	2.7446		2.96604	3.56778	2.61663	1.95905	3.26061
1.27971	3.44335	0.92256	1.2719	1.31332		1.58161	2.65736	2.02825	2.20818	2.00815		2.49675	2.48941	2.45914	3.22169	6.21609
1.06707	2.28528	1.09145	2.2003	1.31886		1.23028	2.68977	1.38881	1.98397	2.49657		1.1081	3.30409	1.06617	3.10501	10.3836
1.01919	2.23757	0.852685	2.29935	2.65597		3.35605	1.86996	1.20627	1.74333	1.28943		1.17062	3.89035	2.63255	3.63961	5.00428
1.10409	2.83331	1.00963	1.40616	1.19237		1.88942	2.40176	2.54269	3.17236	1.55856		2.82844	4.80068	2.05617	2.91484	3.57255
1.18662	2.2763	1.53128	1.92848	1.59758		1.51509	2.03059	1.85174	1.55165	1.62297		1.49162	2.65239	1.19341	4.16155	2.04292
0.948872		1.99211	1.93238	2.79287		2.32975	2.3919	1.59089	2.21041	1.34763		1.98777	3.96707	2.0717	3.84283
1.32115		1.13097		1.18073		1.07484	2.9765	1.04718	2.31678	1.4909		4.94052	4.35243	3.22445	2.17314
		0.978721		2.38912		1.03212	2.22311	1.63119	1.92673	1.61041		2.7419	4.71177	2.42753	2.55823
				1.47659		2.42664	2.8076	1.62662	1.21122	1.72704		1.90343	2.25973	4.21773	3.57084
				1.37939		2.23466	1.94072	1.9276	1.94477	2.258		3.02781	3.69342	2.23726	3.47482
				3.01713			2.58717	1.02771	2.48173	2.65997		3.18557	2.6766	3.6726	4.32854
				2.5559			1.78122	1.53956	2.6191	2.71318		3.93054	3.46642	1.73937	3.48231
							2.49187	1.24226	3.25632	1.7013		3.50368	3.46112	2.54331	3.31066
							4.06666	1.8065	2.95536	2.38583		4.10093	3.48791	1.35436	2.83399
							2.81811	1.1489	1.81467	1.72013		1.99236	3.41279	1.97105	4.17044
								1.06605	3.21957	2.21382		4.17862	4.45316	1.55113	1.90827
								1.05816	1.35481	3.65133		4.62797	4.46743	2.24275	4.15567
								1.20567	3.20878	1.4947		5.10906	3.41678	1.70433	2.52668
								1.57984	3.19629	2.99006			3.05896	2.6996	2.93297
								2.4537	2.42877	2.51803			6.65784	1.61219	4.04892
								1.66048	1.93197	2.40964			2.981	2.31506	4.24765
								1.89071	1.97571	3.76841			3.9948	2.78879	1.34471
								1.73175	2.2824	2.12806			4.54022	2.60223	1.84924
								2.00648	2.27704	1.9172			4.49829	2.28867	4.34043
								2.88631	3.48963	5.87329			1.4207	3.60712	4.7523
								1.8602	3.33665	2.0042				2.66142	3.623
								1.6348	1.71915	3.76872				3.52161	3.2988
								1.17091						2.42294	5.24685
								1.44382						3.40009	3.39347
								1.28151						1.28271	4.05229
								2.33833						3.92574	5.05286
								2.39702						2.44732	5.98923
								2.03397						2.74574	3.91157
								2.03397						2.13187	6.39918
								1.60852						4.06348	4.43493
														3.28648	7.96052
														3.1592
														5.8919
														3.34364
														6.22935
														6.452
