# Supplementary material for: Phosphoinositides regulate force-independent interactions between talin, vinculin, and actin
Source: eLife. 2020 Jul 13;9:e56110. doi: 10.7554/eLife.56110 (PMC7384861; doi:10.7554/eLife.56110)
Supplement: Figure 6—figure supplement 2—source data 1. [file elife-56110-fig6-figsupp2-data1.xlsx]

## Sheet: Talin
Tn2_A					Tn2_B					Tn2_C
n=9					n=10					n=9
Raw averages			Normalized		Raw averages			Normalized		Raw averages			Normalized		Distance between Tn peak/actin peak
594 (Vn)	647 (Tn)	488 (actin)	647 (Tn)	488 (actin)	594 (Vn)	647 (Tn)	488 (actin)	647 (Tn)	488 (actin)	594 (Vn)	647 (Tn)	488 (actin)	647 (Tn)	488 (actin)	A	B	C
0	32.4444	1.77778	0.00194764	0.000822819	0	35.2	2.3	0.0130347	0.00397788	0.333333	35.6667	3.55556	0.0210341	0.011496	0.274	3.562	2.74
0.125	32.5556	1	0.00330016	-0.00380084	0.333333	35	2	0.00922285	0.00109411	0.555556	35.4444	2.66667	0.0168221	0.00576982	0.685	0.685	1.507
0.125	32.7778	1	0.0037216	-0.00400129	0.444444	35	1.6	0.00935464	-0.00125307	0.111111	35.6667	2.33333	0.020625	0.00334356	1.781	2.329	2.329
0.25	32.5556	2.77778	0.00352003	0.00730782	0.333333	35.2	2.2	0.0133119	0.00354174	0.222222	35.5556	3.11111	0.0186061	0.00857808	1.507	0.822	4.247
0	32.7778	2.55556	0.0041324	0.0056365	0.333333	35.2	2.6	0.0121111	0.00525039	0.333333	35.5556	2.33333	0.0187383	0.0034455	4.384	5.343	0.685
0.125	32.5556	2.11111	0.00279354	0.00289428	0.333333	35.2	2.6	0.0126959	0.00629712	0.222222	35.4444	2.66667	0.0174063	0.00569218	3.014	1.918	1.507
0.125	32.5556	2.88889	0.00248758	0.00775811	0.222222	35	2.7	0.00922285	0.00784039	0.222222	35.4444	2.66667	0.0165873	0.00586608	7.124	0.411	-0.548
0	33	2.33333	0.00619222	0.00459594	0.444444	35	2.8	0.00922285	0.00831043	0.333333	35.7778	2.11111	0.0218513	0.00164331	8.768	2.74	4.932
0	32.6667	3.66667	0.00347136	0.0124106	0.222222	35.1	2.1	0.0108923	0.00271163	0.222222	35.8889	1.66667	0.0267078	-0.000820867	4.658	-0.137	1.918
0.25	32.5556	3.55556	0.00360089	0.0118019	0.222222	35.1	2.2	0.0119306	0.00314191	0.444444	35.8889	2.33333	0.025349	0.00344203		6.987
0.125	32.7778	2	0.00461065	0.00203763	0.111111	35.3	5.3	0.0150159	0.0275491	0.222222	35.5556	2.88889	0.0196125	0.00663926	slices =0.137um
0.25	32.7778	1.77778	0.00365191	0.00184087	0.444444	35.2	2.5	0.0123113	0.00527643	0.222222	35.5556	2.77778	0.0199601	0.00666729
0.25	32.5556	2	0.00281878	0.00241337	0	35.4	4	0.0168633	0.0172364	0	36	2.77778	0.0279172	0.00651177
0	32.5556	2.11111	0.00287315	0.00320489	0.111111	35.3	4.5	0.0153809	0.0205987	0.222222	35.4444	4.11111	0.0162146	0.0151571
0.25	33.3333	1.77778	0.00793287	0.000735332	0.333333	35.6	2.5	0.0206502	0.00497588	0.222222	35.7778	2.88889	0.0228382	0.00751758
0.375	32.7778	2.44444	0.00395529	0.00524013	0.444444	35.4	3.1	0.0166433	0.0106174	0.333333	36.1111	2.11111	0.0301666	0.00165644
0.375	32.5556	2.77778	0.00303017	0.00770668	0.222222	35	3.3	0.00829481	0.0113559	0	36.2222	1.88889	0.0312462	0.000785142
0.125	32.6667	4.77778	0.00357011	0.0192595	0	34.7	2.7	0.00323746	0.00772428	0.333333	35.6667	2.77778	0.0216074	0.00635915
0.25	32.7778	3.55556	0.00433954	0.0117978	0.333333	35.5	2.3	0.0171149	0.00421947	0.444444	36.1111	1.77778	0.0293034	-0.000231139
0.25	32.7778	2.11111	0.00471694	0.00304931	0.444444	35.2	3.1	0.0115058	0.00997998	0.888889	35.7778	2.22222	0.0230068	0.00264511
0.125	32.6667	4	0.00349016	0.0145423	0.333333	35.3	2.4	0.0133023	0.00443371	0.555556	35.6667	3	0.0217482	0.00784812
0.125	33	3.11111	0.00539899	0.00915642	0.777778	35.2	3.2	0.0121788	0.0113218	0.111111	35.8889	2.77778	0.0251279	0.00682411
0.25	32.8889	3.44444	0.00520242	0.0109949	0.222222	35.4	2.3	0.016945	0.0048674	0.555556	35.8889	3.44444	0.026769	0.0112896
0.25	33.2222	3.22222	0.00658477	0.010136	0.333333	35.4	4.1	0.0174582	0.0183451	0.333333	36.6667	2.77778	0.0411098	0.00652568
0.125	33.1111	2.22222	0.00673605	0.00361834	0.222222	35.2	3	0.0120535	0.0100718	0.222222	35.6667	1.66667	0.0192048	-0.000816771
0	33.3333	3.33333	0.00789097	0.010281	0.333333	35.5	3.7	0.0176134	0.0160152	0.333333	35.6667	2.11111	0.020757	0.00223706
0.25	33.2222	3.33333	0.00744169	0.0102916	0.777778	35.4	2.1	0.0166133	0.00231702	0.111111	35.6667	2.11111	0.0220888	0.00222035
0.125	33.2222	3.11111	0.0073402	0.0089599	0.888889	35.1	3.6	0.00952739	0.0147707	0.111111	35.8889	3.88889	0.0262726	0.0139219
0.25	33.2222	2.66667	0.00745496	0.00664934	0.444444	35.1	3.3	0.0104417	0.0125102	0.444444	36.5556	1.77778	0.0376904	-0.00023771
0.25	33.2222	2.22222	0.0070805	0.00371293	0.444444	35.7	2.9	0.0210773	0.00852793	0.222222	36	2.44444	0.0270128	0.00433126
0.125	33.2222	2.22222	0.00746859	0.00401354	0.555556	35.6	2.1	0.0182389	0.0014524	0.222222	35.5556	3.66667	0.0193458	0.0120444
0.375	33.1111	2.55556	0.00700386	0.00566944	0.111111	35.9	3.2	0.0253712	0.011599	0.222222	35.6667	2.77778	0.0211722	0.00635138
0	33.5556	2.11111	0.0101934	0.00321925	0.444444	35.6	2.5	0.0202296	0.00515332	0.333333	36.2222	2.88889	0.0322925	0.00718528
0.125	33.4444	2.88889	0.00914164	0.00742942	0.666667	35.6	2.6	0.0181791	0.00651504	0.333333	36	3.55556	0.027867	0.0113319
0.25	33.3333	3.55556	0.00782044	0.0121074	0.222222	35.7	2.9	0.0218952	0.00911261	0.333333	36	3	0.0273714	0.0081601
0.625	33.4444	4	0.00914463	0.0148977	0.222222	35.4	3.5	0.0171007	0.0135081	0.333333	35.6667	3.55556	0.0217302	0.0113418
0.125	33.2222	2.66667	0.00733943	0.00632318	0.444444	35.9	3.2	0.0254062	0.0117017	0.111111	35.7778	2.66667	0.0232109	0.00591489
0.375	32.7778	2.11111	0.00424703	0.00348444	0.222222	35.6	2.6	0.0202378	0.00617249	0.111111	36.1111	2.44444	0.0294779	0.00444095
0	33.2222	3.66667	0.00786612	0.0131679	0.555556	35.3	4.4	0.0143453	0.0202728	0.111111	35.5556	4	0.0188007	0.0144239
0.125	33.2222	4.66667	0.0068354	0.0186147	0.333333	35.4	3.9	0.0162009	0.0166729	0.444444	36.1111	2.55556	0.0294719	0.00461826
0.125	33.2222	1.33333	0.00699846	-0.00152282	0.666667	35.9	3.2	0.0259621	0.0109057	0.111111	36	2.88889	0.0268812	0.00726869
0.125	33.3333	2.77778	0.00826073	0.00661537	0.222222	35.8	3.5	0.0239393	0.0128308	0.111111	36.8889	2.55556	0.044974	0.00503053
0.125	33.3333	2.66667	0.00779479	0.00642273	0.111111	35.6	4.9	0.0207028	0.0234048	0.111111	36	5	0.0286641	0.0207175
0.25	33.5556	3.44444	0.00948014	0.0110837	0.111111	35.2	5.2	0.0131766	0.0270278	0.555556	35.5556	4.44444	0.0185705	0.0174711
0.25	33.4444	1.77778	0.00867276	0.000997131	0.222222	35.7	4.8	0.0212937	0.0232795	0.333333	36.4444	4.33333	0.0370625	0.0165808
0	32.7778	3.55556	0.00491507	0.0120801	0.555556	35.7	3.2	0.0220227	0.0113657	0	35.7778	4.55556	0.0228878	0.0177962
0.125	33.2222	3.66667	0.00742289	0.012106	0.222222	35.5	5	0.0185051	0.0244184	0.111111	35.8889	4.33333	0.0248248	0.0168903
0.125	32.8889	3.88889	0.00458417	0.0143519	0.222222	35.6	3.2	0.020426	0.0104197	0.555556	36.5556	2.88889	0.0386538	0.00711437
0.25	33.4444	3.22222	0.00871037	0.00975464	0.222222	35.6	2.4	0.0207607	0.00375432	0.444444	36	3.66667	0.0273669	0.0121733
0.25	33.2222	3.77778	0.00674251	0.0135397	0.666667	35.9	3.8	0.0259757	0.015324	0.444444	36.4444	3.22222	0.0361414	0.00934286
0	33.6667	5.33333	0.0105327	0.0228274	0.333333	35.8	4.2	0.0240583	0.0181671	0.222222	36.4444	3.77778	0.0363606	0.0132419
0	33.5556	3.66667	0.00882425	0.0126059	0.333333	36.1	3.6	0.0290702	0.0143471	0.111111	37.1111	3.22222	0.0472418	0.00975395
0.125	33.2222	3.44444	0.00639383	0.0112426	0.111111	36.1	3.5	0.0296347	0.0132609	0.111111	36.4444	3.44444	0.0353694	0.0106236
0.125	34.1111	3.88889	0.0136598	0.0143622	0.333333	36.1	4.2	0.0284826	0.0188717	0.222222	37.1111	3.44444	0.0492465	0.0105178
0.125	33.6667	5.55556	0.0105558	0.0246083	0.444444	36.1	4	0.0296071	0.0181086	0	37	3.77778	0.0482021	0.0129399
0	34.1111	4.66667	0.0131767	0.0185932	0	36	4.2	0.0285302	0.0195406	0.333333	36.6667	4.11111	0.040088	0.0152033
0	33.6667	4.22222	0.0103907	0.0162569	0.444444	36	4.2	0.0288956	0.0189556	0.222222	36.7778	5.11111	0.0420952	0.0212217
0	35	2.77778	0.0189747	0.00696728	0.333333	35.5	4.2	0.0178722	0.0193982	0.555556	37.2222	4.55556	0.0530987	0.0182748
0	33.6667	3.44444	0.0110645	0.0108724	0	36.6	4	0.0390324	0.0178304	0.444444	36.7778	5	0.0443288	0.0208009
0.5	34.2222	3.33333	0.0147954	0.0106306	0.222222	36	3.8	0.0263055	0.0149729	0.777778	37.1111	4.88889	0.0486018	0.020234
0.625	34.6667	4.11111	0.0177495	0.0153293	0.444444	36.1	5.1	0.028914	0.0261296	0.333333	37.3333	4.33333	0.0543121	0.0164159
0.5	34.4444	4.88889	0.0169333	0.0202033	0.222222	36.6	4.6	0.0380418	0.023062	0.111111	36.6667	6.33333	0.0417844	0.0297461
0.25	34.4444	3.44444	0.0168037	0.011276	0.555556	36.6	4.6	0.0379552	0.0215397	0.333333	37.3333	5.55556	0.0542662	0.0245362
0.25	34.6667	5.44444	0.016875	0.0225946	0.222222	36.4	5.1	0.0368891	0.0262086	0.111111	37.5556	6.77778	0.0588809	0.0324085
0	34	3.33333	0.0129083	0.0104543	0.444444	36.1	4.6	0.0303963	0.0217384	0.111111	37.5556	3.88889	0.0584061	0.0136888
0.375	35.2222	4.77778	0.0209266	0.0198595	1.11111	36.1	5.9	0.0293396	0.0327082	0.111111	36.6667	4.22222	0.0399965	0.0161365
0	34.6667	3.88889	0.0178225	0.0138172	0.111111	36.4	5.2	0.0361356	0.0287466	0.666667	37.8889	5	0.0655049	0.0208042
0.375	34.5556	5.11111	0.0162459	0.0217159	0.333333	36.6	4.9	0.0381461	0.0245993	0.222222	38	5.33333	0.067902	0.023131
0	35	3.66667	0.0190281	0.0122802	0.777778	36.9	5.4	0.0439825	0.0286988	0.555556	37.3333	6.66667	0.0542961	0.0321663
0.375	35.5556	5.22222	0.0242842	0.0222126	0.222222	36.7	6.7	0.0408864	0.0394158	0.222222	37.3333	6.22222	0.0550889	0.0284854
0	35.3333	4.77778	0.0216948	0.0200033	0.444444	36.8	4.8	0.04154	0.0245648	0.333333	37.2222	5	0.0524569	0.0205595
0.25	35.7778	7.77778	0.0246654	0.0384725	0.111111	36.9	5	0.0446747	0.0267981	0	37.6667	5.22222	0.0597599	0.0228571
0.125	35.7778	6.44444	0.0248388	0.03002	0.111111	36.9	5.2	0.0457564	0.0260574	0.111111	38	6	0.0666946	0.0270264
0.25	37.1111	4.88889	0.033784	0.0202851	0.111111	36.8	4.8	0.0428257	0.024583	0.444444	38.4444	7.55556	0.0750768	0.0375925
0	37.5556	5.66667	0.0391895	0.0256192	0.444444	37	6	0.0461155	0.0339259	0.555556	38.7778	9	0.0857475	0.0473963
0.5	36.3333	6.33333	0.0286866	0.0297705	0.333333	38.4	6.3	0.0708544	0.0366692	0.555556	38.5556	7.22222	0.078787	0.0353551
0.125	37.4444	4.77778	0.0370761	0.0199538	0.444444	37.5	7.2	0.0542808	0.042427	0.222222	38.6667	8.44444	0.0815817	0.0433462
0.25	37	6.66667	0.0335759	0.0308009	0.222222	38.2	7.1	0.0692789	0.0425448	0.555556	39	7.44444	0.0879206	0.0366494
0.375	38.1111	7.66667	0.0403429	0.0363283	0.555556	37.9	7.8	0.0628164	0.0473035	0.555556	40	8.33333	0.109099	0.0431308
0.5	38.4444	8.33333	0.0433935	0.0403182	0	38.1	9	0.0645244	0.0576366	0.444444	39.7778	7.55556	0.10596	0.0378051
0.375	39.2222	7.44444	0.0483198	0.0355661	0.666667	39	8.4	0.0784224	0.0523777	0.333333	40.5556	11.6667	0.118306	0.0644031
0.5	39.5556	7.33333	0.04981	0.0362369	0.555556	38.8	8.3	0.0798807	0.0515577	0.111111	41.4444	10.7778	0.135763	0.0591201
0	41.5556	10.2222	0.0658361	0.0543829	0.555556	40.4	8.6	0.108344	0.0540998	0.222222	42.6667	9.88889	0.161537	0.0524153
0.25	42	8	0.0688452	0.039403	0.444444	39.2	11.2	0.0846448	0.0749223	0.444444	41.5556	12.2222	0.140798	0.0675938
0	43.4444	7.44444	0.0781037	0.0366561	0.222222	41.4	11.5	0.125752	0.0761875	0.111111	44.4444	15.6667	0.198547	0.0906662
0.125	44.3333	7.44444	0.0848181	0.0352682	0.222222	40.5	12.4	0.10867	0.0824199	0.111111	45.3333	15.6667	0.213487	0.0891073
0.375	47.1111	11.2222	0.102704	0.0586975	0.333333	41.3	11	0.124725	0.0734046	0.111111	46.6667	15.2222	0.24188	0.0860411
0.375	48.2222	13	0.111462	0.0700149	0	42.9	13.2	0.154573	0.0901741	0.777778	48	18.2222	0.27046	0.10577
0.25	51	11.5556	0.131562	0.0612999	0.111111	43.4	15.5	0.165391	0.108632	0.555556	50.2222	22.8889	0.314146	0.136182
0.125	55.3333	12.6667	0.160675	0.0672461	0.111111	46	14.8	0.214363	0.10419	0.222222	53.3333	29.5556	0.37779	0.177695
0.25	58.8889	14.6667	0.18722	0.0809215	0.111111	47.4	19.3	0.235588	0.138846	0.222222	55.6667	30.5556	0.426207	0.184993
0.5	63.4444	18.3333	0.223792	0.102655	0.333333	50.6	21.6	0.297519	0.157617	0.333333	55.2222	37.7778	0.416017	0.231943
0	69.5556	25.4444	0.266154	0.146129	0.444444	52.9	29.2	0.341825	0.218488	0.333333	61.3333	39.2222	0.529655	0.241453
0.625	81.8889	21.2222	0.346409	0.119508	0.888889	57.3	36.3	0.414148	0.272204	0.888889	62.4444	50.4444	0.550609	0.315451
0.375	95.3333	35.3333	0.441548	0.207448	0.444444	62.8	41.1	0.516427	0.312566	0.333333	67.5556	60.7778	0.649719	0.381224
0.25	109.444	40	0.53483	0.235702	1	70	50.7	0.646287	0.387236	0.555556	71.1111	67.5556	0.716756	0.426822
0.875	125.889	51.6667	0.636786	0.307905	0.333333	72.3	62.8	0.677565	0.483918	0.888889	77.2222	91.7778	0.823664	0.584534
0.5	145.333	65.5556	0.756855	0.394223	0.222222	77.1	69	0.774781	0.532546	0.555556	78.6667	97.1111	0.848789	0.61999
2.5	158.444	82	0.835924	0.491302	0.555556	82.4	90.3	0.859017	0.702516	0.555556	78.3333	103.778	0.836608	0.665134
2.5	173.556	103.556	0.930351	0.627101	0.222222	82.1	89.4	0.851141	0.689198	0.777778	81.1111	113.778	0.895394	0.732469
1.5	184.667	119.222	1	0.720025	0.444444	90.2	99.1	1	0.774686	0.888889	86.4444	118.111	1	0.759947
1.625	171.444	131.111	0.914189	0.796573	0.777778	81.9	100.3	0.844921	0.790103	0.555556	79.5556	120.333	0.869603	0.776358
2	156.333	125	0.81743	0.755203	0.222222	82.3	103.9	0.855466	0.816252	0.888889	79	122.556	0.861646	0.787486
1.125	142.111	139.778	0.726262	0.848482	0.333333	78.4	105.1	0.782226	0.823966	0.333333	76.5556	116	0.817247	0.747395
0.5	129.333	137.667	0.653108	0.835418	0.333333	75.1	105.2	0.728626	0.826025	0.222222	76.1111	129.444	0.8024	0.835246
1.125	114.556	136.778	0.552757	0.827744	0.666667	72.9	105.9	0.691745	0.832313	0.666667	75.7778	124.111	0.798153	0.79964
0.25	109.778	138	0.519659	0.839747	0.444444	71	105.7	0.664492	0.828132	0.666667	72.4444	136.778	0.730892	0.881128
0.875	104.444	133.111	0.484739	0.805875	0.444444	69.8	100	0.640903	0.783259	0.333333	72.6667	130.333	0.745063	0.841186
0.25	97.4444	137.778	0.442352	0.834933	0.222222	66.5	98.9	0.586718	0.776459	0.555556	71	135.556	0.715914	0.874168
0.5	93	138.889	0.410872	0.842354	0.333333	65.6	94.2	0.573701	0.740824	0.444444	70.4444	123.556	0.700741	0.797793
0.75	88.1111	131	0.383242	0.794357	0.222222	63.6	99.3	0.527925	0.778292	0.444444	70.3333	121.444	0.703163	0.783416
0.75	85.4444	137.667	0.366371	0.83248	0.333333	64	102.6	0.538144	0.805101	0.555556	68	130.222	0.662442	0.839841
0.625	85.1111	128	0.360525	0.777115	0.666667	61.8	97.3	0.497922	0.759667	0.333333	69.2222	128	0.681889	0.823734
0.25	81.4444	136.889	0.334508	0.826633	0.888889	61.5	97.8	0.498217	0.768157	0.222222	67.2222	126.667	0.645633	0.816902
0.25	80.2222	141.333	0.325897	0.857176	0.555556	61.3	98	0.493604	0.764862	0.555556	68.4444	131.778	0.664484	0.848309
0.125	79.3333	132.111	0.323766	0.800941	0.111111	59	98.1	0.448661	0.768786	0.555556	66.4444	130.556	0.629336	0.841065
0.125	74.6667	131.222	0.289631	0.795578	0.555556	59.1	97.4	0.454615	0.761084	0.444444	66.5556	119.444	0.626387	0.769779
0.5	71.2222	135.778	0.266136	0.824024	0.666667	58.9	101.7	0.447408	0.791476	0.333333	66.6667	125.556	0.624328	0.809318
0.5	73	125.667	0.275814	0.766409	0.333333	58.8	97.7	0.445868	0.763138	0.777778	67.3333	123	0.646951	0.794414
0.5	72	129.222	0.270009	0.784569	1.22222	58.4	96	0.434306	0.751438	1	65.2222	115.111	0.593793	0.74295
1	71.3333	133.889	0.267522	0.809424	0.111111	57.7	97.9	0.421656	0.767857	0.333333	66.6667	119.333	0.635189	0.770579
0.125	68.3333	125.778	0.244096	0.762402	0.555556	58.6	92.6	0.438875	0.729573	0.777778	65.7778	121.778	0.616691	0.786115
0.25	73.1111	131.333	0.278482	0.795799	0.666667	58.5	97.3	0.43687	0.766377	0.333333	64.7778	124.111	0.59708	0.798689
0.375	73.4444	129.667	0.278188	0.78912	0	58.3	88.2	0.437313	0.694762	0.222222	64.4444	120.889	0.586072	0.777144
0.25	72.5556	125.222	0.275181	0.758748	1	57.2	95.3	0.416534	0.745566	0.111111	64.7778	124.556	0.592534	0.800963
0.375	69.7778	127	0.255431	0.76861	0.555556	57.7	89.5	0.425547	0.699321	0.111111	64.1111	124.556	0.580009	0.805255
0.375	71.1111	129.889	0.263433	0.7903	0.777778	57.9	100.4	0.429836	0.789014	0.444444	65.2222	121	0.60202	0.782768
0.5	69.3333	127.889	0.254195	0.774071	0.111111	57.2	97	0.417523	0.763368	0.111111	63.4444	111.889	0.564892	0.719622
0	67.3333	129.778	0.239371	0.785049	0.333333	56.7	94.4	0.408136	0.747896	0.333333	62.7778	119.111	0.560454	0.768757
0.125	69.4444	136.222	0.253199	0.828128	0.444444	56.5	94.1	0.407605	0.739229	0.888889	65.4444	115.444	0.609672	0.744489
0	69.3333	120.444	0.250495	0.731969	0.666667	58.3	94.6	0.433083	0.743418	0.555556	62.7778	118.444	0.556337	0.763942
0.25	68.2222	124.778	0.245172	0.751146	0.555556	55.7	91.8	0.386176	0.720569	1	64.2222	129.111	0.585	0.834367
0.5	69.4444	127.333	0.252004	0.771557	0.777778	55.3	88.9	0.378597	0.695742	0.555556	64.4444	120	0.592928	0.774857
0.375	67.6667	123.556	0.243189	0.749357	0.333333	54.9	84.8	0.372417	0.667294	0.222222	63.6667	116.444	0.571308	0.751321
0.875	65.7778	129.778	0.231585	0.789385	0.444444	56.8	92.6	0.407144	0.71924	0.555556	63.7778	116.444	0.575382	0.752442
0.375	68.3333	126.667	0.246465	0.767525	0.555556	56	88.1	0.391506	0.688932	1.11111	62.3333	112.444	0.546671	0.726014
0.5	65.1111	117.889	0.221968	0.715576	0.444444	55.6	96.1	0.387946	0.754266	0.444444	63.2222	118.556	0.561941	0.76492
0	66.8889	128.222	0.237353	0.775658	0.555556	55.8	87	0.39089	0.68217	0.444444	63.4444	114.444	0.566629	0.734896
0.25	68.7778	123.222	0.250134	0.746254	0.333333	56.1	91.9	0.39872	0.717817	0.666667	63.8889	115.111	0.578751	0.740797
0.75	68.8889	124.222	0.251663	0.753151	0.222222	56.7	90.8	0.407209	0.711441	0.555556	63	114.222	0.559457	0.736432
0.25	67	129.333	0.238841	0.781575	0.444444	55.9	94.7	0.393756	0.741078	0.333333	62.7778	114.111	0.561625	0.735582
0.125	65.5556	118.111	0.222276	0.718508	0.333333	55.1	97.4	0.379383	0.763744	0.666667	63.7778	111.778	0.579135	0.721416
0.125	67.4444	126.222	0.237786	0.764506	1	56.7	92.9	0.405667	0.726913	0.444444	61.5556	112.444	0.533444	0.724902
0.375	66.4444	117.889	0.232163	0.715092	0.222222	54.8	95.6	0.369692	0.751761	0.222222	62.5556	120.889	0.550716	0.780373
0.625	65.6667	120.111	0.22692	0.728445	0.333333	55	85.6	0.377316	0.670868	0.222222	62.8889	109.778	0.558905	0.705881
0.125	66.7778	124.556	0.232022	0.757301	0.111111	55.4	86.9	0.376866	0.684698	0.555556	65	105.222	0.597679	0.676327
0.375	65.6667	118	0.228252	0.716183	0.222222	55.2	93.9	0.378298	0.734319	0.333333	62.7778	113.667	0.557892	0.729718
0.125	66.2222	122.111	0.231993	0.73987	0.444444	54.9	93.9	0.37412	0.73579	0.222222	60.7778	105.778	0.516795	0.681355
0.25	66.3333	126.667	0.235192	0.76904	0.222222	56.5	91.5	0.40154	0.718616	0.222222	61.8889	115.444	0.537357	0.743805
0.75	63.4444	116.111	0.215041	0.702456	0.333333	55.2	97.4	0.377038	0.767356	0.333333	62.5556	109.889	0.550195	0.709627
0.375	66.7778	122.111	0.23679	0.743449	0.222222	54.7	100.6	0.36744	0.792766	0.888889	61.5556	112.556	0.532129	0.72536
0.375	66.1111	125.111	0.229906	0.758818	0.555556	54	95.1	0.353842	0.749583	1	61.5556	117.667	0.529405	0.759748
0.375	65.6667	123.889	0.226621	0.751089	0.333333	53.3	91.8	0.340869	0.721128	0.222222	62	103.778	0.535506	0.668394
0	65.6667	120.667	0.229285	0.729345	0.555556	55.9	92.5	0.390824	0.723618	0.666667	60.3333	108.444	0.507135	0.698671
0.125	64.7778	123.111	0.221692	0.744991	0	55.7	88.2	0.393196	0.693539	0.333333	62.6667	107.444	0.555479	0.689403
0.375	65.3333	123.667	0.225256	0.750824	0.111111	54	86.5	0.354837	0.674891	0.444444	60.8889	108.111	0.51931	0.697752
0.625	64.3333	120.556	0.217765	0.731658	0.222222	55.2	89.2	0.381544	0.697543	0.777778	61.6667	114.111	0.532075	0.736289
0.25	64.6667	119.111	0.219528	0.720903	0.777778	54.6	84.6	0.367034	0.6592	0.333333	60.4444	108.333	0.510606	0.695855
0.125	64.1111	117.444	0.218352	0.710997	0	53.9	85.6	0.357845	0.672366	0.444444	61.6667	106.444	0.534712	0.682604
0.375	66.4444	113.111	0.230158	0.685293	0.444444	53	82.5	0.33977	0.643772	0.222222	61.5556	107.444	0.526431	0.691723
0.375	63.4444	120.667	0.212765	0.733978	1	55.4	90.7	0.383025	0.707472	0.777778	62.4444	106.333	0.545357	0.684143
0.375	64.2222	114.667	0.21664	0.695226	0.888889	54.4	86.1	0.363308	0.674415	0.555556	61.5556	109.889	0.529041	0.709298
0.625	62.5556	120.778	0.205254	0.7351	0.222222	52	86.8	0.324558	0.682401	0.222222	60.6667	120	0.513311	0.773322
0.125	63	112.222	0.214797	0.681314	0.666667	57.3	87.3	0.414661	0.684275	0.333333	60.6667	114.444	0.513893	0.739429
0.375	64.3333	122.778	0.216667	0.750582	0.222222	54.8	84.8	0.373203	0.666354	0.777778	61.1111	111.667	0.524511	0.718162
0.25	60.6667	112	0.197236	0.681098	0.555556	53.1	86.2	0.33978	0.673329	1.33333	59.5556	102.222	0.490673	0.659575
0.125	62.8889	118.222	0.209369	0.722333	0.333333	54.3	84.1	0.361126	0.65635	0.333333	62.7778	113.556	0.552945	0.728956
0.375	62.5556	120.222	0.207497	0.72938	0.333333	53.3	86.2	0.343903	0.673529	0.333333	60.8889	110.778	0.520373	0.712426
0.25	61.8889	116.889	0.200105	0.709837	0.555556	52.2	87.7	0.319866	0.685869	0.888889	59.6667	101.222	0.493584	0.651308
0.375	60.6667	108.444	0.192137	0.653307	0.333333	52.7	76.8	0.334444	0.603761	0.444444	60.3333	111.111	0.506221	0.715378
0.5	65.1111	111.889	0.225862	0.676741	0.222222	53.5	86.1	0.349603	0.674729	0.222222	61.4444	112.444	0.529309	0.72214
0.125	63.1111	114.556	0.210045	0.697823	0.222222	52.5	85.6	0.331027	0.668166	0.777778	60.3333	100.778	0.508821	0.645557
0.625	62.4444	109.111	0.206207	0.664124	0.555556	53.4	83.5	0.343951	0.652211	0.444444	59.8889	102.778	0.498732	0.664421
0.25	62.2222	119.667	0.204496	0.727003	0.333333	54.7	82.5	0.367097	0.641743	0.222222	59.2222	100.889	0.49023	0.649031
0.375	63	104.667	0.208573	0.633361	0.333333	53.8	80.3	0.354194	0.625617	0.222222	61	100.556	0.516022	0.646422
0.5	61.5556	106.444	0.201469	0.642743	0.555556	53.6	82.8	0.35012	0.648619	0.444444	61.1111	103.778	0.521415	0.668202
0.125	64.3333	106.889	0.220949	0.64507	0.222222	52.8	78.1	0.334381	0.611798	0.666667	59.8889	102.111	0.493455	0.657919
0.5	63.4444	109.111	0.211265	0.662471	0.111111	53.2	84.5	0.347846	0.663844	0.333333	61.2222	105.444	0.525513	0.67925
0.375	62.8889	110.889	0.210268	0.674257	0.333333	53.1	79.3	0.337563	0.614578	0.888889	59.6667	101.222	0.491982	0.650379
0.375	60.1111	111.111	0.192666	0.676493	0.333333	51.3	82.1	0.307731	0.638154	0.111111	61.8889	106.556	0.538739	0.686525
0.625	63.6667	107.556	0.214429	0.65287	0.333333	54.7	87.8	0.365847	0.688071	0.333333	59.4444	100.222	0.488843	0.644498
0.125	61.5556	106.667	0.203622	0.648251	0.222222	53.5	81	0.344307	0.634638	0.222222	59.2222	99.7778	0.490617	0.642085
0.5	61.8889	109.556	0.204066	0.663455	0.555556	52.4	82.9	0.323815	0.648539	0.555556	61.6667	101.111	0.535113	0.650498
0.625	63.8889	110.444	0.214678	0.669942	0.444444	53.1	81.7	0.341875	0.637724	0.222222	59.5556	98.1111	0.491857	0.630984
0.25	62.2222	102.778	0.202947	0.625846	0.555556	53	84.1	0.333026	0.658096	0.333333	61.3333	109.889	0.526692	0.707376
0.125	61	122.444	0.197754	0.742967	0.444444	52.6	84.2	0.326941	0.657024	0.666667	59.2222	107.444	0.48799	0.693674
0.5	62	103.222	0.205524	0.625435	1.11111	53.5	86.3	0.347733	0.674048	0.444444	58.1111	93.4444	0.462207	0.599586
0.375	62.1111	106.333	0.206573	0.64273	0.222222	51.4	80.2	0.305525	0.623734	0	58.3333	95.8889	0.470987	0.614489
0.375	61.5556	112.778	0.199107	0.683379	0.111111	53.3	74.7	0.342237	0.581375	0.333333	58.7778	97.8889	0.476026	0.629626
0.375	61.2222	118.667	0.199942	0.723197	0.333333	53.2	81.2	0.343526	0.635958	0.333333	60.3333	105.889	0.50986	0.681649
0	61.5556	106.778	0.199511	0.648939	0.222222	52.6	76	0.334168	0.593328	0.111111	60.6667	102.111	0.513669	0.655281
0.125	61.3333	107.444	0.200192	0.650934	0.666667	51.3	78.5	0.305732	0.616799	0.222222	59.2222	95	0.482507	0.608432
0.75	64.4444	100.778	0.218579	0.609891	0.444444	53.3	79.8	0.344723	0.624671	0.111111	59.5556	97.5556	0.491758	0.625895
0.25	60.6667	99.8889	0.194902	0.605076	0.333333	52	74.5	0.324688	0.576507	0.333333	60	96.4444	0.49924	0.617596
0	60.2222	108.556	0.195109	0.659638	0.444444	51.8	78.6	0.318316	0.615172	0.333333	58.7778	100.667	0.478445	0.647568
0.5	60.8889	113.444	0.194391	0.689631	0.777778	53.2	74.9	0.341926	0.582819	0.222222	59.8889	98.3333	0.501983	0.632125
0.25	61	110.111	0.197613	0.665095	0.666667	52.1	74.4	0.324217	0.579839	0.444444	60	97.5556	0.501135	0.626058
0.5	63.1111	109.333	0.212746	0.660544	0.222222	52.5	81.2	0.322947	0.631518	0.333333	60.7778	103.222	0.515903	0.664481
0.375	62.1111	104.778	0.205226	0.634609	0.222222	52.4	75.7	0.327417	0.591311	0.222222	60.7778	95.8889	0.520867	0.617833
0.5	60.6667	99.4444	0.191932	0.603976	0	52.5	84.3	0.331851	0.661403	0.222222	59.8889	98.4444	0.50025	0.63117
0.375	60.1111	109.889	0.190483	0.670137	0.111111	52.1	82.8	0.321844	0.643106	0.666667	57.7778	97.4444	0.453025	0.623574
0.125	60	97.5556	0.190064	0.590819	0.333333	52.4	74.9	0.325703	0.581951	0.111111	59.4444	98.5556	0.491022	0.631685
0.125	58.7778	101.444	0.182241	0.614441	0.444444	51.6	80	0.315546	0.62258	0.222222	59.5556	104.667	0.494322	0.673993
0.25	60.1111	101.778	0.189297	0.616712	0	51.9	81.8	0.317282	0.638888	0.111111	59.2222	102.556	0.483487	0.660211
0.125	61.6667	99	0.201257	0.59748	0.111111	52.6	66.6	0.329616	0.518069	0.666667	60.8889	93.8889	0.521264	0.604172
0	61.6667	102.333	0.202006	0.617527	0.666667	51.5	79.6	0.312379	0.623701	0.444444	59.4444	107.222	0.48973	0.689906
0.75	61.2222	104.778	0.196921	0.636104	0.777778	51.1	83.2	0.306671	0.649985	0.444444	59.1111	101.111	0.485821	0.650837
0.375	59.6667	100.333	0.189159	0.610579	0.333333	52.5	69.4	0.331008	0.541921	0.333333	59.7778	96.4444	0.496572	0.620016
0.5	59	106.333	0.183351	0.644304	0.555556	51.7	74.7	0.307945	0.581402	0.666667	59.1111	101.889	0.483576	0.656221
0.375	59.7778	101.222	0.190344	0.612835	0.555556	52.9	77.7	0.338938	0.609106	0.555556	59.8889	100.111	0.503309	0.642835
0.125	62.6667	105.444	0.204119	0.636999	0.333333	52.9	70	0.335518	0.545556	0.333333	58.8889	92.8889	0.479313	0.597717
0.75	60	102.444	0.190704	0.619228	0.555556	50.6	74.4	0.295754	0.580326	0.777778	59.7778	96	0.494268	0.615967
0.25	61.5556	100.889	0.201738	0.612326	0.666667	52.6	72.7	0.336677	0.567504	0.444444	58.1111	95	0.465025	0.611079
0.25	60.3333	101.444	0.191102	0.613519	0.333333	50.8	76.1	0.300356	0.591554	0.444444	57.8889	99.5556	0.461433	0.64096
0.25	58.6667	100.667	0.183207	0.607935	0.444444	51.4	69.1	0.303437	0.53585	0.333333	59.3333	102.111	0.48514	0.655906
0.375	60.5556	97	0.192545	0.586984	0.444444	51.9	75.2	0.318563	0.587143	0	58.8889	103.667	0.477951	0.66964
0.375	61.2222	96.4444	0.199735	0.582634	0.444444	49.7	83.9	0.281634	0.659944	0.222222	59.1111	97.2222	0.481499	0.624615
0.375	60.1111	104.333	0.186666	0.632597	0.333333	51.4	75.8	0.310647	0.591685	0.333333	57.8889	94.6667	0.461672	0.607991
0.25	58.7778	97.7778	0.18576	0.589678	0.333333	50.2	76.5	0.285924	0.596844	0.333333	58.7778	104.222	0.479819	0.670713
0.25	57.7778	101.667	0.175932	0.616419	0.333333	50.2	71.7	0.286469	0.562402	0.666667	58.1111	83.4444	0.460198	0.534931
0.25	60.2222	96.1111	0.191715	0.582329	0.555556	50.8	80.4	0.298266	0.627498	0.444444	58.8889	101	0.477798	0.650105
0.25	60.7778	95	0.195867	0.574652	0.444444	50.5	76.3	0.292907	0.595844	0.333333	58.2222	94.6667	0.462887	0.608211
0.375	59	104.778	0.182078	0.635288	0.444444	51.4	69.9	0.3099	0.543932	0.222222	58.3333	86.3333	0.469416	0.554608
0.375	59.5556	100.444	0.18572	0.606265	0.666667	51.3	74.7	0.310494	0.582321	0.444444	59.6667	104.778	0.48672	0.673241
0.125	58.7778	92.3333	0.183616	0.559871	0.222222	52	73.4	0.322114	0.568068	0.222222	56.5556	99.2222	0.430714	0.639294
0.375	58.2222	99	0.177561	0.597659	0.222222	50.1	77.4	0.286108	0.602151	0.555556	61.5556	93.8889	0.5287	0.604523
0.75	58.4444	86.8889	0.178496	0.523439	0.444444	49.6	72.2	0.275271	0.557218	0.777778	56.8889	101.556	0.437704	0.653365
0.125	60	94.2222	0.190399	0.567444	0.666667	51.1	75	0.303821	0.583511	0.222222	59.3333	94.8889	0.488675	0.608654
0.375	59.3333	104.222	0.189088	0.628832	0	52.2	74.4	0.325246	0.577909	0.333333	57.4444	91.5556	0.446537	0.587802
0.125	58.6667	95.3333	0.179544	0.577941	0.444444	51.1	77.7	0.300999	0.601581	0.222222	58.3333	86.3333	0.47157	0.551769
0.5	59	101.889	0.186338	0.612623	0.555556	50.1	74.8	0.283959	0.580993	0.666667	58.3333	92.4444	0.469527	0.590023
0.375	59.7778	95	0.188819	0.574671	0.666667	50.4	70.2	0.287841	0.541669	0.555556	56.8889	90.6667	0.436364	0.58451
0	58	97.1111	0.175115	0.590007	0.333333	52.5	69.8	0.323957	0.544113	0.333333	58	90.4444	0.461891	0.5798
0.375	58.2222	101.111	0.181253	0.611809	0.222222	51.8	75.7	0.318195	0.589111	0.222222	57.6667	96.5556	0.455015	0.620008
0.5	59.3333	93.6667	0.185191	0.565831	0.333333	50.5	75.2	0.294492	0.584636	0.333333	56.1111	90.4444	0.418302	0.579612
0.375	59.7778	98	0.185922	0.593352	0.444444	51	75.9	0.302917	0.591218	0.444444	59.1111	92.4444	0.48691	0.593632
0	59.7778	103.889	0.191048	0.630387	0.666667	51.8	75.5	0.316057	0.585804	0.555556	58.2222	93.5556	0.462122	0.601762
0.375	58.7778	102.778	0.17991	0.62235	0.666667	50.4	67.2	0.292572	0.523904	0.444444	58.2222	86.4444	0.464807	0.554594
0.125	60.5556	99.2222	0.194211	0.597314	0.111111	49.9	72.4	0.281172	0.56136	0.333333	58.4444	89.5556	0.472759	0.573913
0	60.2222	86.1111	0.191382	0.516438	0.333333	50.2	80.7	0.28616	0.628721	0.555556	58.1111	90.4444	0.464231	0.579926
0.375	57	97.5556	0.169163	0.586316	0.444444	50.6	75.8	0.293743	0.594491	0.555556	56.8889	92.4444	0.438631	0.59413
0.125	59.5556	99.6667	0.186462	0.602638	0.222222	50.7	66.7	0.293528	0.521563	0.888889	58	93.3333	0.463518	0.598595
0.75	59.7778	91.3333	0.188341	0.552204	0.444444	50.1	71.9	0.285716	0.562362	0.555556	58.3333	93.1111	0.466008	0.597358
0.375	58.5556	89.6667	0.178588	0.543754	0.222222	50.6	70.6	0.290895	0.55146	0.333333	56.8889	93.4444	0.435996	0.59962
0.125	56.7778	102.556	0.166524	0.621021	0.222222	51.4	71	0.308559	0.550511	0.222222	57.3333	96.3333	0.454536	0.619228
0	60.5556	99.7778	0.193186	0.600876	0.111111	51	72.6	0.299644	0.564299	0.222222	57.7778	85.2222	0.453105	0.547024
0.625	59.6667	95.7778	0.186877	0.580147	0.333333	49.6	73.7	0.277671	0.571473	0.333333	58.1111	96.5556	0.468215	0.621372
0.25	57.7778	97.2222	0.17395	0.587	0.222222	49.7	75.2	0.277584	0.586862	0.222222	57.7778	88.5556	0.458475	0.568178
0.375	58.2222	85.8889	0.178528	0.520083	0.555556	51.1	68.7	0.306193	0.532173	0.333333	56.5556	88.3333	0.43656	0.567223
0.125	57.4444	93.1111	0.174561	0.56138	0.444444	51.4	67	0.312209	0.515535	0.333333	57.6667	87.7778	0.459108	0.562223
0.375	57.3333	101	0.171659	0.610836	0.444444	51.3	68.4	0.310875	0.531881	0.222222	57.7778	88.6667	0.457698	0.569782
0.25	57.8889	93.2222	0.176721	0.567737	0.222222	49.5	71.7	0.272158	0.554705	0.555556	57.3333	91.7778	0.448495	0.588508
0.5	57.5556	92.3333	0.173256	0.557957	0.333333	49.8	72.3	0.280931	0.560948	0.555556	58	88.2222	0.458186	0.567115
0.375	57.5556	94.8889	0.173825	0.572382	0.555556	50.5	63.7	0.287803	0.496905	0.888889	57.7778	87.7778	0.456596	0.563678
0	59.3333	88.7778	0.187455	0.540292	0.111111	49.6	73.7	0.274209	0.572599	0.444444	56.3333	92.8889	0.42772	0.596839
0.125	57.1111	94.7778	0.171424	0.573094	0	49.3	69.7	0.270181	0.539589	0.333333	56.3333	89.6667	0.4234	0.576031
0	56.5556	89.5556	0.163452	0.542715	0.333333	49.6	68.4	0.278487	0.527943	0.555556	56.6667	86.2222	0.435534	0.552247
0.125	57.1111	90.5556	0.167821	0.549481	0.555556	49.6	67.2	0.277676	0.517879	0.222222	59.6667	89.5556	0.492468	0.574682
0	58.1111	94	0.178682	0.563934	0.666667	50.5	68.9	0.291037	0.529559	0.444444	56.7778	88.2222	0.436197	0.566112
0.125	58.2222	92	0.176884	0.554944	0.222222	49.7	73	0.27769	0.56667	0.444444	57.1111	86.7778	0.443399	0.558232
0.25	60.1111	100.667	0.192676	0.609297	0.111111	49.4	73.3	0.275596	0.570038	0.777778	58.3333	82.3333	0.467012	0.527963
0.25	57.5556	90.8889	0.173277	0.548564	0.333333	49.8	68.3	0.276585	0.531022	0.222222	55	82.6667	0.40646	0.530428
0.375	59.1111	89.7778	0.183815	0.542887	0.333333	49	72.5	0.265096	0.561738	0.555556	57.2222	87.5556	0.45112	0.562403
0	57.2222	93.3333	0.173383	0.564934	0.222222	48.7	67.3	0.258954	0.520689	0.222222	56.3333	83.2222	0.433021	0.534939
0.375	58.8889	102.778	0.180139	0.618728	0.444444	48.9	70.7	0.264062	0.552966	0.222222	56.2222	82	0.426446	0.525937
0.25	58.2222	91.8889	0.179686	0.557326	0.555556	49.4	69	0.277057	0.54215	0.444444	56	88.1111	0.427133	0.56608
0.125	55.4444	85.4444	0.158986	0.516152	0.222222	48.7	69.6	0.258988	0.53865	0.222222	56.7778	84.8889	0.432462	0.543075
0	57.4444	94.7778	0.170176	0.572338	0.666667	49.8	74.7	0.278803	0.584355	0.555556	57.3333	88.3333	0.450275	0.565494
0.5	57.7778	92	0.176229	0.55711	0.333333	50.4	68.4	0.29409	0.529366	0.666667	58.2222	90	0.463585	0.578712
0.375	56.8889	95.4444	0.167489	0.577282	0.444444	49.6	72	0.273339	0.561972	0	56.8889	80.7778	0.439726	0.516635
0.5	57.6667	90.8889	0.176422	0.548957	0.666667	48.1	69.4	0.247247	0.538285	0.222222	57.5556	83.8889	0.458816	0.536076
0.5	57	82.4444	0.169376	0.497831	0.333333	48.6	62.9	0.252934	0.486371	0.444444	54.6667	81.6667	0.396163	0.522809
0.25	60.2222	87.2222	0.191958	0.526376	0.444444	48.9	74.7	0.26365	0.585336	0.444444	58.1111	86.7778	0.461367	0.554245
0	55.7778	86	0.160629	0.520134	0.333333	48.9	73	0.264865	0.571133	0.777778	56.2222	80.5556	0.42423	0.515452
0.125	57.3333	85.6667	0.172118	0.520029	0.444444	51.2	66.9	0.303642	0.518804	0.555556	56	88.5556	0.419404	0.567388
0.375	59.2222	89.1111	0.186541	0.540439	0.444444	49.5	72.7	0.273743	0.562773	0.555556	57.2222	90.5556	0.444572	0.58153
0	58	92.1111	0.174022	0.556496	0.222222	51	68.4	0.304568	0.533957	0.333333	56.3333	86.3333	0.429831	0.554084
0.625	56	87	0.16331	0.527348	0.333333	48.5	67	0.257776	0.521676	0.333333	56	81.4444	0.421518	0.521982
0.5	58.4444	95.4444	0.179573	0.57769	0.555556	50	68.8	0.282537	0.53521	0.777778	58.2222	82.2222	0.465298	0.528861
0.125	58.6667	88.5556	0.179116	0.53486	0.111111	49	69.8	0.264228	0.545785	0.222222	56	79.4444	0.42426	0.508812
0	57.2222	88.1111	0.17215	0.533972	0.111111	48.4	68.2	0.251473	0.52861	0.333333	55.6667	86.6667	0.413086	0.555237
0.25	57.8889	92.4444	0.179591	0.558152	0.222222	48.6	65.1	0.257604	0.508433	0.111111	56	86.1111	0.421422	0.552038
0.625	58.4444	85.4444	0.179801	0.517473	0.444444	49.4	67.5	0.27056	0.521724	0.222222	55.7778	87.5556	0.418272	0.560847
0.125	56.5556	86.2222	0.167519	0.517528	0.777778	47.7	72.3	0.242951	0.561353	0.666667	56.7778	84.1111	0.433992	0.540925
0.125	56	86.6667	0.1615	0.522065	0.333333	48.5	67	0.254008	0.521713	0.333333	56	83.2222	0.424197	0.534682
0.125	57.8889	88.6667	0.176732	0.537378	0.666667	50	71	0.28394	0.555434	0.222222	57.6667	89.1111	0.455157	0.572398
0.5	55.3333	87.8889	0.158549	0.533344	0.333333	48.8	72.6	0.258479	0.56928	0.111111	54.6667	79.3333	0.398699	0.506637
0.25	55.8889	86.4444	0.165204	0.524009	0.111111	50.2	66.9	0.286493	0.517111	0.666667	54.7778	78.2222	0.401035	0.50036
0.25	57.7778	84	0.176245	0.504192	0.333333	50.1	69	0.284939	0.53648	0.333333	55.4444	82.2222	0.412463	0.526742
0.125	55.5556	87.1111	0.159588	0.526298	0.666667	49.2	62	0.269567	0.482041	0.333333	55.2222	83.3333	0.403256	0.53517
0	56.6667	84.3333	0.166636	0.509886	0.222222	48	70.5	0.249481	0.545025	0.333333	55.8889	84.8889	0.421713	0.542313
0.25	56.1111	91.2222	0.165891	0.552855	0.444444	47.7	63.8	0.242884	0.496439	0.666667	55.5556	87.4444	0.413568	0.560172
0	57	83	0.170428	0.500245	0.666667	48.2	63.2	0.250871	0.489441	0.666667	54.5556	87.8889	0.395407	0.564182
0	55.2222	89.2222	0.157701	0.540157	0.666667	49.6	62.1	0.275427	0.481215	0.555556	55.5556	76.8889	0.409807	0.491924
0.125	57	85.5556	0.169617	0.518087	0.111111	49.6	66.8	0.276169	0.514435	0.444444	55.5556	77.3333	0.422175	0.495918
0.375	55	83.1111	0.156569	0.501974	0.333333	48.8	63.5	0.260489	0.495273	0.333333	55.2222	80.6667	0.408042	0.515649
0.25	57.5556	90.8889	0.172161	0.549017	0.555556	49.2	66	0.270197	0.513588	0	55.2222	81.4444	0.408977	0.521057
0.375	54.4444	90	0.156077	0.544606	0.111111	49.2	69.5	0.269783	0.539896	0.333333	55.5556	82.6667	0.412054	0.52966
0.25	56.4444	74.5556	0.167383	0.445375	0.333333	50.2	69.6	0.287376	0.541392	0.555556	55.4444	85.4444	0.407844	0.548596
0.5	55.8889	79.2222	0.162849	0.478871	0.111111	48.4	62.5	0.256685	0.483692	0.222222	55.4444	88.7778	0.407266	0.567644
0.25	56.2222	88.5556	0.163969	0.537542	0.444444	50.8	65.7	0.295979	0.506011	0.555556	55.7778	82.8889	0.418217	0.531517
0.375	56.5556	78.3333	0.165677	0.472522	0.555556	49.5	66.4	0.269237	0.51423	0.666667	55.7778	85.3333	0.415895	0.546246
0	56.7778	88.1111	0.168882	0.531832	0.333333	48.8	60.9	0.258826	0.46898	0.222222	55.5556	80.3333	0.411791	0.514079
0	55.8889	82.2222	0.165819	0.496056	0	48.9	61.8	0.262423	0.479593	0.555556	56.7778	90.6667	0.435812	0.58264
0.75	55.5556	92.3333	0.159254	0.558633	0.111111	48.8	65.6	0.260627	0.506144	0.444444	56.5556	85.5556	0.434101	0.54785
0.625	55.1111	83.6667	0.15726	0.506584	0.222222	46.5	67.7	0.22235	0.525521	0.222222	54.6667	86	0.39326	0.552268
0.25	55.3333	83	0.157481	0.503977	0.222222	49.2	64.3	0.26712	0.500671	0.777778	53.5556	79.2222	0.374303	0.507923
0.125	56.5556	77.5556	0.163867	0.467053	0.666667	48.2	66.5	0.248311	0.514929	0.222222	54.4444	76.3333	0.389947	0.485883
0.125	58	91.6667	0.179634	0.553157	0.555556	48.7	61	0.258641	0.470379	0.333333	55.4444	82.7778	0.40762	0.530079
0.625	56.2222	83.7778	0.165602	0.506442	0.666667	48.2	61.4	0.247327	0.470423	0.111111	54.8889	81.2222	0.399288	0.520455
0	57.1111	85.7778	0.170912	0.516504	0.222222	48.9	66	0.260374	0.51398	0.555556	56.2222	83.4444	0.428376	0.533902
0.125	55.6667	88.1111	0.163302	0.531282	0.333333	49.2	60.7	0.268329	0.467471	0.222222	54.3333	74.7778	0.383668	0.478116
0.25	56	82.1111	0.165067	0.494391	0	48.4	62.8	0.249224	0.48576	0.555556	55.3333	84.6667	0.410453	0.543761
0.375	55.2222	77.3333	0.160653	0.462844	0.333333	49.2	63.9	0.269061	0.496354	0.444444	55.5556	81.6667	0.40815	0.522437
0.125	54.6667	83.1111	0.155362	0.502181	0.222222	47.8	67.7	0.245341	0.527899	0.111111	55.3333	78.4444	0.414587	0.503835
0.25	55.7778	83	0.165631	0.500388	0.222222	47.7	63.3	0.240186	0.488028	0.333333	55.7778	84.5556	0.419394	0.540227
0.25	55.8889	89.7778	0.165314	0.544239	0.222222	48.4	58.9	0.254872	0.457302	0.111111	54.5556	80.1111	0.392317	0.512474
0.75	54.8889	80	0.155931	0.481098	0.666667	49.6	59.6	0.27665	0.461627	0.333333	56.5556	80.5556	0.434822	0.517548
0	54.5556	78.5556	0.152932	0.473965	0.555556	48.9	64.1	0.261038	0.500797	0.222222	56.7778	76.8889	0.439219	0.492782
0.375	55.8889	86.4444	0.162302	0.523382	0.111111	49.6	62.1	0.275907	0.480072	0.222222	53.7778	78.5556	0.378835	0.501929
0.125	55	78.5556	0.15431	0.470346	0.444444	47.6	62.6	0.23899	0.485335	0.222222	55.7778	77.8889	0.41856	0.498671
0.25	55.5556	84	0.162407	0.50418	0	48.7	65.3	0.261373	0.507807	0.333333	53.8889	81.6667	0.379913	0.523775
0.125	55.6667	75.7778	0.162527	0.45596	0.333333	47.4	64.5	0.23548	0.498768	0.888889	55.3333	82	0.408566	0.52397
0.25	57.1111	84.2222	0.166698	0.507735	0.111111	48.7	61.3	0.259861	0.476138	0.333333	56	79	0.418078	0.504727
0.375	55.6667	77.4444	0.163113	0.465962	0	49.1	62.1	0.264362	0.482351	0.333333	53.8889	83.3333	0.37538	0.533169
0	56.1111	78.4444	0.167526	0.472531	0.666667	47.4	63.3	0.234364	0.487529	0.333333	55.2222	79	0.409706	0.507799
0	55.8889	80.4444	0.164862	0.484821	0.666667	48.3	57.1	0.250861	0.442404	0.111111	54.3333	75.1111	0.389564	0.479473
0.75	59.1111	80.4444	0.186347	0.486491	0.333333	47.9	64.4	0.244613	0.497466	0.333333	53.6667	76	0.373934	0.486486
0.125	54.7778	77.1111	0.156078	0.465421	0.555556	48	62.5	0.247141	0.483995	0.222222	56	79.7778	0.42783	0.510926
0	54.2222	88.1111	0.150805	0.531208	0.555556	48.1	63	0.250675	0.485573	0.222222	54.3333	78.1111	0.385699	0.501414
0.125	55	83	0.156821	0.504372	0.222222	47.4	63.6	0.23648	0.491204	0.333333	55.1111	79.1111	0.404032	0.506031
0.25	54.8889	81.6667	0.152948	0.491979	0.777778	48.3	61	0.253277	0.472356	0.111111	53.1111	72.3333	0.35811	0.460834
0.25	54.1111	81.7778	0.152135	0.492875	0.444444	48.8	59.9	0.259718	0.46221	0.333333	55.5556	77.2222	0.41446	0.49291
0.25	55.5556	84.3333	0.161409	0.509219	0.111111	48.5	58.4	0.254986	0.452836	0	54.2222	78.3333	0.388292	0.503519
0.25	55.2222	83	0.156302	0.501229	0.666667	48.1	61.3	0.246555	0.473828	0.333333	54.4444	82.2222	0.389511	0.527913
0.375	53.3333	77.7778	0.14482	0.468176	0.333333	48.5	65.3	0.2524	0.507827	0.333333	53.4444	76.4444	0.37274	0.487596
0.125	56.1111	78.4444	0.163863	0.473584	0.222222	49.3	59.4	0.273511	0.456949	0.444444	54.4444	80.3333	0.39523	0.514679
0.625	55.7778	86.8889	0.159153	0.527068	0.222222	48.5	57.6	0.253037	0.446641	1	55.5556	75.4444	0.41695	0.482115
0	55.8889	76.4444	0.16266	0.460746	0	46.7	62.6	0.220999	0.486096	0.333333	55.2222	81.2222	0.40536	0.518554
0.25	55.2222	85.7778	0.157368	0.517556	0.222222	47.9	52.3	0.242989	0.403231	0.333333	54.6667	77.8889	0.39909	0.498738
0.125	56	80.4444	0.165537	0.485125	0.666667	49.4	52.7	0.275489	0.406695	0.444444	53.4444	80.3333	0.373252	0.512916
0.375	56.2222	89.1111	0.163054	0.53801	0.333333	48	59.3	0.247685	0.458553	0.555556	54.5556	82	0.393628	0.524098
0	54.7778	78.6667	0.154879	0.47182	0.222222	48.4	60.5	0.251706	0.466851	0.333333	55.4444	84.5556	0.410345	0.53956
0.375	55.1111	90.7778	0.157868	0.54876	0.555556	47.5	61.4	0.239152	0.476446	1	54.5556	75.4444	0.39411	0.481796
0.125	54.5556	85.1111	0.15505	0.515981	0.333333	47.8	57	0.241714	0.441636	0.555556	55.6667	77.1111	0.414579	0.492773
0.125	56.2222	81.8889	0.163038	0.496368	0.444444	47.7	58.3	0.240678	0.453106
0.125	56	78.6667	0.164874	0.474736	0.666667	47.5	58.3	0.238026	0.450901
0.25	54.3333	85.3333	0.154319	0.515621	0.333333	48.7	57.7	0.260399	0.445193
0.375	55	81.6667	0.156126	0.492837	0.222222	47.3	62.8	0.230158	0.487819
0.5	55.1111	78.3333	0.158623	0.472981	0.222222	47.2	59.4	0.233318	0.460813
0.375	54.1111	83.6667	0.149208	0.504883	0.222222	48.1	61.9	0.24677	0.48134

## Sheet: Talin_VnWT
Tn_VnWT_A						Tn_VnWT_B						Tn_VnWT_C
n=10						n=10						n=9
Raw averages			Normalized			Raw averages			Normalized			Raw averages			Normalized
594 (Vn)	647 (Tn)	488 (actin)	594 (Vn)	647 (Tn)	488 (actin)	594 (Vn)	647 (Tn)	488 (actin)	594 (Vn)	647 (Tn)	488 (actin)	594 (Vn)	647 (Tn)	488 (actin)	594 (Vn)	647 (Tn)	488 (actin)	Distance between Tn peak/actin peak
6.24814	34.3	7	0.00532795	0.0152517	0.010235	1.3	38.9	3.3	0.00228176	0.00470787	0.00418101	13.8	46	44.9	0.102463	0.025274	0.265467	A	B	C
5.93446	33.7	5.2	0.000635746	0.0120844	-0.00233418	1.2	39.35	1.7	0.00176611	0.0052404	0.00136269	12.7	46.5	48	0.0955744	0.0264751	0.295499	0.685	0	0
6.02078	33.7	6	0.00277178	0.0114966	0.00289647	1.4	39.1	2.6	0.00230433	0.00498342	0.00427593	14	45.5	46.9	0.0984551	0.0248331	0.262684	-0.274	0	0.411
6.2071	34.3	6.1	0.00742063	0.0136483	0.00342877	1.75	39.4	2.2	0.00337378	0.00529817	0.00238887	13.3	45.7	51.2	0.098382	0.0240263	0.309544	0.137	0.137	0
5.99343	33.7	6.2	0.00334471	0.0119476	0.0045665	1.85	39.2	3.4	0.00337063	0.00530988	0.00606502	12.7	46.8	53.4	0.093192	0.0270889	0.315259	-0.411	-0.137	0
5.87975	34	6	0.00173466	0.0131354	0.00725259	1.8	40.2	1.5	0.00325156	0.0061328	-0.000141198	15.3	47.1	49	0.118904	0.0279401	0.294432	0.137	0.137	-0.137
5.96607	33.8	6.5	0.00218533	0.0126706	0.00669516	1.5	39.15	1.9	0.00280304	0.00510781	0.00164934	12.5	46.6	48.5	0.0879375	0.0271137	0.295265	-0.274	0.274	-0.411
6.45239	34	5.5	0.00785221	0.0134195	0.00137972	1.85	39.1	2.4	0.00289064	0.00496046	0.00399758	15	47.2	44.6	0.111265	0.028734	0.266567	0.137	0	0
5.93871	34.5	5.8	0.00312347	0.0164894	0.00206702	1	39.9	2.7	0.000774333	0.00575717	0.00489445	13.4	46.3	48.8	0.10512	0.0253197	0.294558	0.137	0	-0.137
6.32504	34.2	5.7	0.00671047	0.014779	0.00188558	2.45	39.95	2.5	0.00521137	0.00568804	0.00296923	13.3	47.3	47.9	0.0992657	0.0281035	0.286949	0.411	0	0.548
5.91136	33.7	6.1	0.00272641	0.0115611	0.006111	2	40.05	2.4	0.00286605	0.00591693	0.00319363	14	46.9	46.3	0.111975	0.0276076	0.279605	0.274	0
5.99768	34.1	7	0.00433708	0.0146614	0.00739264	1.7	39.95	1.9	0.00229197	0.00581276	0.00211383	13.8	45.9	48.8	0.108054	0.0247056	0.296731	slices =0.137um
5.684	34	6.2	-0.000169188	0.0140906	0.00640363	1.65	39.85	2.6	0.00281934	0.00581611	0.00511423	15	47.1	46.8	0.114625	0.027135	0.272731
6.37032	34.6	6.3	0.00875561	0.0164906	0.00561135	1.5	39.6	1.8	0.00229904	0.00553091	0.00161499	12.4	46.7	40.7	0.0880862	0.0264347	0.244451
5.75665	34.4	6.5	0.00494826	0.0137353	0.01082	1.2	39.8	1.8	0.00194829	0.00589626	0.00202924	15.2	45.6	48.4	0.117361	0.0251375	0.285753
6.04297	34.3	6.4	0.00573096	0.0147769	0.00692127	1.25	40.1	2.6	0.00178785	0.00589212	0.00272516	13.4	46.9	47.5	0.100603	0.0253668	0.292447
6.42929	34.4	6.3	0.00924058	0.0160206	0.0080178	2.1	40.4	1.8	0.00417209	0.00620811	0.00186163	15.9	46.4	46.5	0.119847	0.0262468	0.273209
6.01561	33.8	7	0.00842229	0.00997848	0.00935301	2.2	40.35	2.5	0.00375378	0.00636619	0.00181131	15.1	47.9	50.8	0.11381	0.0298666	0.311566
5.90193	34.1	6.6	0.00367631	0.0140737	0.00988185	1.95	41.1	2.6	0.00293156	0.00700994	0.00340266	14	46.8	50.1	0.0973513	0.0278047	0.298862
5.98825	33.8	5.9	0.00440992	0.0120796	0.00438517	1.6	41.2	2.7	0.00306629	0.00691617	0.00493517	14.7	47	45.5	0.10978	0.0268523	0.273902
5.87458	33.6	5.1	0.00411539	0.0120134	-0.00485091	1.6	40.55	2	0.00225852	0.00650491	0.00172895	13.8	46.1	48.3	0.107734	0.0256242	0.289685
6.3609	34.6	5.2	0.0119465	0.0156123	-0.00116345	2.25	41.5	1.7	0.00457212	0.00748136	0.00115017	14.5	47	47.4	0.107476	0.0276082	0.28959
6.84722	33.9	7	0.0172487	0.013114	0.00987127	2.35	40.6	3.5	0.00445296	0.00666062	0.00802167	15.6	45.6	47.4	0.114285	0.0241369	0.287423
5.53354	34.2	6.4	0.000672189	0.0141457	0.00652882	2.25	41.5	1.7	0.00385319	0.00757887	-0.000331354	17	46.3	47.2	0.128486	0.0267962	0.271681
6.11986	34.3	6.8	0.00936686	0.0151086	0.00728182	1.3	41.95	2.5	0.00187744	0.00792664	0.00482207	13.4	47	52.3	0.100164	0.0274284	0.322247
6.60619	34.2	6	0.0140766	0.0145598	0.0016589	0.7	41.75	4.1	0.000764293	0.00739937	0.00991893	13	46.5	44.8	0.100508	0.0270107	0.274474
5.79251	34.4	6.3	0.00652903	0.0141503	0.00793438	1.75	41	1.8	0.00274681	0.00673143	0.00052361	14.9	47.1	47.5	0.116264	0.0270882	0.302989
6.37883	34.5	6.1	0.01122	0.0169577	0.00487978	1.1	41.15	2.3	0.0013325	0.00706699	0.00342425	15.7	46.8	48.8	0.123279	0.0265002	0.294025
6.06515	34.2	6.3	0.00789168	0.0148677	0.00678372	1.25	41.85	2.5	0.00189032	0.00762081	0.00496846	13.8	46.4	50.8	0.103351	0.0259898	0.30623
5.95147	34.4	6.1	0.00742097	0.015689	0.00335916	1.4	41.8	1.8	0.00224027	0.00769733	0.000820819	14.9	46.3	51.1	0.107516	0.0261633	0.30339
5.7378	34.5	6.3	0.00619319	0.0146402	0.00505124	2.75	41	3.4	0.00585334	0.00665803	0.00723596	14	46	52.2	0.103774	0.0255036	0.328199
6.32412	34.3	7	0.0133578	0.0141451	0.0122199	3.25	42.25	2.4	0.00641344	0.00832202	0.00384412	13.4	46.2	48.6	0.102349	0.0257468	0.2881
5.71044	34.4	6.1	0.00325403	0.0160594	0.00402035	1.6	42.9	2.4	0.00198085	0.00905429	0.00283824	13.2	48	51	0.106057	0.0297996	0.307081
5.79676	34.3	6.4	0.00631646	0.0153594	0.00526087	2.2	42.75	3.1	0.00388602	0.00874637	0.00627081	16.1	46.1	49.9	0.127143	0.0248278	0.301594
6.48308	34.3	7.4	0.0151802	0.0147347	0.0137526	1.45	42.55	2.4	0.00228636	0.00868454	0.00270303	14.2	45.6	51.4	0.104526	0.0242117	0.298157
5.5694	34.7	5.7	0.00301768	0.0183129	-0.00169606	3.15	42.15	3.6	0.00631078	0.00783463	0.00921959	16.6	47.1	50.9	0.12802	0.0273172	0.30984
6.05573	34.8	6.5	0.0107757	0.0168951	0.00545924	2.55	43.3	2.7	0.00474952	0.00926359	0.00549875	15.8	47	47.6	0.118636	0.0266963	0.295026
5.94205	35	6.9	0.00647938	0.0196254	0.00827005	3.15	42.65	3.4	0.00648044	0.00867876	0.00731305	15.1	46.9	45.4	0.108067	0.0274688	0.27503
5.82837	34.6	5.9	0.00792674	0.0158753	0.0025102	2.1	43	3	0.00272249	0.00921908	0.00512427	13.2	47.1	44.5	0.0976734	0.0284	0.262199
5.51469	34.7	6.9	0.00345828	0.0169087	0.0107121	3	43	3.5	0.00623592	0.00885612	0.00812268	15.8	47.8	49.9	0.117374	0.02926	0.29593
5.30101	35.1	5.9	-0.000222148	0.0198209	0.0022261	3.8	43.9	2.1	0.0079281	0.00984611	0.00178961	17	47.2	51	0.134108	0.0279637	0.305294
6.28734	34.8	7.1	0.0152566	0.0174569	0.0100724	2.8	43.75	2.8	0.00543371	0.0101009	0.00353867	16.3	46.1	48.7	0.123704	0.024511	0.303827
5.37366	35	7.2	0.000957986	0.0194974	0.0108115	2.7	42.95	2.5	0.00431239	0.00919948	0.00456501	14.6	46.8	52.1	0.112233	0.0273475	0.325343
6.65998	34.8	6.3	0.0165849	0.0180156	0.00706024	2.25	43.75	3.3	0.00438509	0.00980976	0.00756496	12.9	47.2	48.6	0.0978373	0.0274248	0.288321
5.7463	35.1	7	0.00810748	0.0196784	0.00848746	2.85	45.55	3.1	0.00576255	0.0119389	0.00626142	13.9	48	47.3	0.106311	0.0296478	0.288981
6.23262	35	6.8	0.0133291	0.0180509	0.0113456	2.9	46.1	3.2	0.0053412	0.0121533	0.00699525	15.2	46.8	46.7	0.109217	0.026464	0.276093
5.71895	35.8	6.7	0.0103389	0.0208988	0.00947826	2.95	44.95	2.3	0.00566152	0.0110096	0.00264324	16.1	47.3	49.4	0.119517	0.0290618	0.295785
6.30527	35.3	6.3	0.0147464	0.0216354	0.00505366	2.65	45.25	2.7	0.00437494	0.0117665	0.00507374	20.3	45.9	47.4	0.153937	0.0246265	0.284463
5.59159	35.4	8.1	0.00596003	0.0208843	0.0185303	3.85	45.45	2.3	0.0074645	0.0115904	0.0037686	15.4	46.6	48	0.11571	0.0257693	0.296161
6.07791	35.1	8.2	0.0104988	0.0204266	0.0170573	4.05	45.05	4	0.00813932	0.0110257	0.0102079	16.9	46.9	48.1	0.131207	0.0272534	0.284812
6.26423	35.3	7.8	0.0160029	0.0204972	0.0160521	3.75	46.25	2.9	0.0075257	0.012309	0.00361073	15.1	48.7	50.3	0.113482	0.031656	0.30913
7.05056	35	7.5	0.0249724	0.0194251	0.012317	4.9	47.2	3.8	0.00991671	0.0134157	0.00944053	16.2	48.5	48.3	0.126477	0.0300407	0.293459
6.53688	35.9	7.9	0.021115	0.0224697	0.0197595	3.85	48.3	2.8	0.00771939	0.0147843	0.00529923	14	47.4	53.1	0.103659	0.0274889	0.313294
7.4232	35.7	8.1	0.0292487	0.02312	0.0170625	4.5	47.65	2.2	0.00928769	0.0138716	0.00337844	14.3	46.7	48.2	0.106249	0.0269957	0.30175
6.80952	35.8	6.7	0.0210107	0.0235217	0.0128986	3.9	48.35	4.9	0.0081741	0.0145616	0.0132655	15.9	47	52.5	0.118528	0.0266703	0.314273
6.09584	35.1	7.4	0.0153718	0.0193958	0.0131891	2.85	48.9	4.1	0.00530557	0.0147563	0.0111615	14.8	46.4	52.1	0.115501	0.0262899	0.315351
6.08216	35.8	6.6	0.0124032	0.0246617	0.00636461	4	50.05	4.1	0.00879981	0.0164204	0.0088099	16.2	48.5	49.4	0.126769	0.0308841	0.296678
5.96849	35.8	6.2	0.0138528	0.0231616	0.00769136	5.85	49.8	5	0.0130289	0.0160734	0.0127986	16.4	46.9	54.3	0.125953	0.0275033	0.332719
5.85481	36.3	7.2	0.00958356	0.0269619	0.0126499	4.85	50.15	4.4	0.00965046	0.016533	0.00917703	18	47.7	52.4	0.130093	0.0293912	0.322366
5.74113	36.1	7.8	0.00981659	0.0251883	0.0157289	5.15	50.95	3.7	0.0105253	0.0171703	0.00753932	17.4	47.7	48.8	0.122873	0.0286591	0.293256
5.92745	36.2	7.7	0.0116212	0.027017	0.0184415	4.55	52.35	4.8	0.00853029	0.0190468	0.013598	17.6	47.4	52.1	0.136375	0.0277028	0.319947
6.11377	36.8	8.7	0.0207366	0.0275416	0.0229074	6.4	50.9	4.6	0.0143811	0.0168918	0.0110502	14.5	47.6	49	0.101916	0.0284845	0.290497
5.7001	36.4	7.1	0.00911553	0.0263428	0.008784	6.1	51.55	5	0.0124429	0.0181282	0.0136765	13.6	46.8	48.7	0.0983554	0.0259119	0.296593
5.58642	36.8	8.4	0.00873909	0.0300408	0.0182672	7	54.25	5.2	0.0146427	0.020749	0.013458	12.8	47.1	49.4	0.0943085	0.0276859	0.29811
6.77274	36.8	7.8	0.0249844	0.0301223	0.0138599	7.7	54.25	4.6	0.0165439	0.020649	0.0133166	14.2	46.9	49.4	0.105498	0.0265657	0.297984
6.35906	37.7	7	0.0205139	0.0335253	0.0106558	7.6	57.2	4	0.0144219	0.0240129	0.00996902	16.4	47.8	48.9	0.127568	0.0295878	0.299439
7.24538	37.5	9.4	0.0297727	0.0338603	0.0257699	8.65	57.9	5.6	0.0188005	0.0246261	0.0176152	19.9	48.3	48.9	0.153921	0.0300104	0.286022
6.53171	37.3	9.1	0.0217817	0.0329445	0.0272293	6.9	58.65	4.6	0.0155534	0.0254527	0.0119191	16.6	46.9	51.2	0.128033	0.026285	0.308151
8.31803	38.2	8.5	0.0504229	0.0357557	0.0145745	7.4	60.4	4.7	0.0152695	0.0271105	0.0126603	16.4	48.3	51.4	0.127737	0.0305331	0.297829
6.90435	38.3	9.4	0.0292917	0.0376884	0.0249097	9.2	63.25	6.4	0.0203055	0.0306311	0.0174836	15.5	46.2	49.9	0.116437	0.0257564	0.291946
6.19067	37.9	10	0.0188681	0.0358595	0.0296587	9.45	64.2	6.3	0.0188951	0.0310643	0.0175501	16.5	47.3	48.6	0.122399	0.0275839	0.285221
6.17699	38.9	9.4	0.0215671	0.0414062	0.0233629	10.35	64.85	7	0.0213522	0.0320782	0.0227463	14.1	45.4	49.3	0.10945	0.0240309	0.299148
6.86332	39.2	9.3	0.024517	0.044106	0.0281593	11.35	66.65	7.4	0.0251742	0.0338906	0.0220449	17.1	48.4	52.9	0.121964	0.0305392	0.32404
6.64964	39.2	10.8	0.0275643	0.0427893	0.0401026	11.45	69.3	7	0.0240811	0.0363658	0.0210232	13.4	48.3	51.9	0.0993815	0.0304441	0.310606
7.73596	40.6	8.7	0.0418335	0.0502045	0.0214629	12	72.3	8.4	0.0264742	0.0393728	0.0252912	16.4	48.5	53.7	0.126632	0.0312152	0.317674
8.22228	40.8	9.9	0.0463146	0.0525304	0.0321874	14.5	76.6	8.2	0.0317483	0.0439115	0.0263125	15.5	48.8	51.2	0.119368	0.0322089	0.324104
8.4086	40.6	10	0.0441719	0.0535766	0.029023	15.35	78.9	8.3	0.0333468	0.046487	0.0255731	15.6	48	56.2	0.118963	0.029746	0.347132
7.69492	42.4	11.4	0.0403942	0.0600532	0.0419631	18.75	83.4	10.2	0.0397875	0.0509296	0.032905	15.9	47.1	51.8	0.117732	0.0289381	0.311965
8.78125	42.7	11.4	0.0556418	0.0625216	0.0395756	18.95	90.95	9.6	0.0426948	0.0588415	0.0330004	15	48	47.6	0.109136	0.03071	0.286626
8.66757	45	12.7	0.0563708	0.0755375	0.0518399	21.7	95.15	11.8	0.0462377	0.0639287	0.0369115	16.5	46.8	50.5	0.12837	0.0267103	0.30343
7.75389	45.7	12.6	0.042659	0.0803828	0.0473787	27.35	98.15	11.6	0.0625629	0.0663394	0.0371088	17.2	48.8	56.2	0.121675	0.0319897	0.329129
10.2402	46.1	12.2	0.0725328	0.0842994	0.0493204	23.2	110.65	13.4	0.0516523	0.0807597	0.0465854	16.3	48.4	54	0.132515	0.030119	0.321531
11.5265	48.5	14	0.0924598	0.0966686	0.0596391	28.9	118.45	12.2	0.0636778	0.0878075	0.0389912	16.5	47.9	53.4	0.130628	0.0302694	0.317898
9.91286	49.3	14.7	0.0705309	0.100631	0.0575343	33.05	131.3	15.5	0.0735155	0.102176	0.0542651	14.3	49	50.2	0.100981	0.0328451	0.300505
10.8992	52.3	15.7	0.0827982	0.119999	0.0718241	44.2	142.1	16.8	0.0993696	0.113455	0.0592609	15.5	47.2	49.5	0.115927	0.028161	0.297635
11.1855	54.8	18.4	0.0875444	0.134323	0.0894631	48.6	162.35	22.2	0.110099	0.13454	0.0776909	16.4	47.5	51.2	0.123027	0.0296026	0.3024
10.6718	59.3	18.7	0.0843413	0.162445	0.0850082	61.7	186.45	25.5	0.138991	0.160116	0.0943453	15.2	48.9	51.1	0.118311	0.0311994	0.313136
13.7581	63	21.8	0.124427	0.182726	0.114277	76.2	208.15	35.3	0.175284	0.182742	0.12852	18.8	48.7	52.9	0.141123	0.0317146	0.317154
15.1445	66.5	27.5	0.143545	0.206732	0.14202	93.15	243	34.7	0.218213	0.220411	0.125713	17.1	47.8	51.8	0.127303	0.0302712	0.31187
16.3308	76.9	23.7	0.159239	0.263989	0.113363	104.4	285.1	48.5	0.240256	0.267495	0.174215	17.6	48.8	52	0.135746	0.0311843	0.323858
16.8171	83.3	31	0.163712	0.308432	0.158083	129.15	341.7	57.4	0.299074	0.326067	0.212537	17.2	47.6	50.7	0.137297	0.0305076	0.308003
23.0034	90.9	38.5	0.242132	0.348336	0.211477	157.2	402.1	75.7	0.366045	0.389846	0.285532	16.1	48.4	49.4	0.124511	0.0304368	0.296164
25.9898	101.2	46.7	0.292023	0.407075	0.270679	175.1	486.65	89.2	0.403063	0.477191	0.328272	18.2	48.2	53.8	0.132321	0.0309428	0.335767
28.4761	116.3	60.5	0.326531	0.495728	0.362254	211.75	575.1	110.5	0.489035	0.568887	0.422386	15	47.3	54.1	0.112783	0.0278301	0.325502
37.0624	128.9	71.4	0.436016	0.570141	0.442465	264.1	667.05	129.7	0.607547	0.66546	0.484436	17.2	49.4	53.3	0.129193	0.0325924	0.325077
40.7487	147.2	86.3	0.495812	0.670977	0.539004	303.8	750.5	159.3	0.695982	0.747225	0.60122	17.9	47	54.6	0.13319	0.0272568	0.332731
48.835	163.1	102.8	0.61207	0.759503	0.668087	340.65	811.95	184	0.774327	0.804548	0.696008	17.2	47.1	52.8	0.134977	0.0280218	0.328294
53.2214	176.6	112.2	0.658824	0.850409	0.72914	357.8	844.2	208.8	0.796337	0.831746	0.79329	17.1	48.5	55.3	0.135635	0.0317207	0.340066
58.7077	189.9	125.9	0.728085	0.92271	0.808205	364.6	878.3	220.2	0.806633	0.86554	0.818656	14.1	48	51.2	0.103427	0.0295966	0.317251
61.894	196.1	133.4	0.791513	0.952968	0.881288	363.65	893.3	218.4	0.791262	0.875892	0.792472	15.4	48.6	55.5	0.117184	0.0301756	0.343703
67.9803	203.9	142.7	0.878224	1	0.943379	366.85	918.2	204.6	0.804496	0.9	0.757249	19.6	47.9	57.4	0.147314	0.0294605	0.346507
63.7667	191	137.4	0.840259	0.921058	0.890833	345.35	888.8	206.8	0.748274	0.868563	0.767443	16.9	48.9	58.6	0.134574	0.033361	0.353217
66.953	180	133.2	0.868021	0.859322	0.889479	320.25	842.55	183.9	0.690303	0.818487	0.674913	17	49.2	61.3	0.127362	0.0323417	0.36568
62.4393	167.2	132.7	0.804187	0.791228	0.872916	278.5	770.45	162	0.599852	0.742937	0.592571	15.3	50	48.8	0.116173	0.0340147	0.288982
68.6256	151.1	111.3	0.87517	0.689781	0.73901	254.65	682.85	156.2	0.543846	0.654486	0.575741	18	48.5	57.5	0.141218	0.0310027	0.352442
53.5119	134.4	116	0.680939	0.599612	0.778135	220.35	601.5	132.3	0.478865	0.572998	0.490651	17.2	48.8	50.2	0.120031	0.0314592	0.306166
56.9983	126.6	106.2	0.730239	0.538493	0.720918	200.6	534.9	123.2	0.438053	0.5056	0.461887	16	49	55.4	0.124423	0.0318373	0.333196
55.7846	116.3	105.2	0.710032	0.479722	0.714354	164.55	473.75	119.1	0.356173	0.446725	0.437817	17.8	49.9	57.6	0.143994	0.0345458	0.335486
55.4709	107.7	102.8	0.699478	0.433128	0.721514	147.9	419.1	112.1	0.316702	0.393265	0.409871	18.1	48.6	55.5	0.139133	0.031216	0.353347
50.8572	104.6	102.3	0.649607	0.405795	0.736773	131.75	368.65	95.8	0.285338	0.340177	0.346934	15.2	49.8	58.9	0.106579	0.0339145	0.354058
50.9436	98.8	101.5	0.633102	0.381703	0.711543	116.6	333.8	87.2	0.25283	0.303987	0.326656	17	48.4	55.4	0.125549	0.0307226	0.333292
47.3299	95.2	82.7	0.596733	0.354253	0.579389	105.35	302	86.7	0.229896	0.273254	0.32093	17.5	49.5	58.9	0.138588	0.0336716	0.354458
48.3162	89.8	82.4	0.604033	0.322944	0.596859	88.45	266.05	75.5	0.192557	0.23577	0.279415	16.4	49.3	55.7	0.123666	0.0328726	0.322098
48.4025	82.2	82	0.579323	0.292766	0.568062	83.95	244.4	81.6	0.181648	0.214463	0.304456	17.1	48.7	56	0.127484	0.0320556	0.33996
48.7888	83.1	84.1	0.614598	0.278867	0.600522	68.5	222.95	77.8	0.149833	0.194236	0.287605	16.8	50.1	58.4	0.128737	0.0345448	0.349776
47.5752	80.8	85.2	0.600499	0.269015	0.610646	72.4	202.2	75.3	0.155713	0.17167	0.276345	19.5	49.1	54.9	0.150904	0.0324361	0.336752
47.7615	78.8	83.2	0.607173	0.24787	0.595329	60.35	182.5	70	0.132372	0.151094	0.260755	15.3	49.4	55.1	0.116464	0.0330807	0.345809
46.5478	75.1	78.9	0.581032	0.242661	0.568567	59.15	169.6	70.7	0.132673	0.138003	0.263761	16.3	49.1	53.8	0.12359	0.0322431	0.341551
47.9341	72.2	79.1	0.592899	0.221609	0.570414	50.3	157.5	61.6	0.111369	0.126604	0.229895	17.7	49.2	56.3	0.136821	0.0332268	0.35089
42.9204	69.4	74.6	0.515637	0.213402	0.549613	49.35	144.9	65.7	0.108374	0.11276	0.237424	15.8	49	53.7	0.124995	0.0317489	0.32229
41.2068	68.5	80.4	0.511953	0.199339	0.57633	46.2	136.75	58.3	0.101328	0.103853	0.212525	18.1	48.7	53.2	0.134861	0.0319764	0.319508
41.3931	67.1	81.7	0.502414	0.195257	0.588843	42.9	129.85	60.1	0.0942452	0.0977297	0.222904	16.8	49.7	56	0.129212	0.0337043	0.333376
45.4794	66.9	74.8	0.550625	0.190645	0.555403	41.95	116.45	63	0.0903286	0.0838005	0.236845	20.3	49.6	56.8	0.15021	0.0333074	0.346086
39.7657	66.9	76.8	0.49205	0.183369	0.568995	34.6	110.35	67.4	0.0770528	0.0783092	0.252063	18	49.8	57	0.140218	0.0338013	0.336022
45.552	65	77.2	0.560253	0.179906	0.549643	35.25	105	57.4	0.075347	0.0726402	0.216802	16.1	48.5	58.5	0.123806	0.0317548	0.360237
39.9384	64.2	78.6	0.499051	0.168862	0.563017	34.35	102.35	63.3	0.0717542	0.0696926	0.229864	17	49.2	55.7	0.128716	0.0321895	0.334914
39.9247	63.6	72.6	0.483477	0.173151	0.53395	31.45	95.8	64.1	0.0685918	0.0632763	0.234445	20.6	48.4	56.7	0.154178	0.0311031	0.344038
39.811	61.5	76.6	0.483564	0.158973	0.538586	30.3	87.4	56	0.0670845	0.054626	0.204265	18	48.7	62.3	0.133533	0.030897	0.37394
42.2973	65.2	77.3	0.533965	0.16638	0.555479	27.65	84.6	56.4	0.0628048	0.0517748	0.208961	16.2	51.2	58.5	0.124123	0.0370006	0.354726
40.9837	62.9	71.7	0.499485	0.16721	0.502132	33.15	82.4	55.8	0.0733372	0.0489979	0.207741	17.4	49.2	57.4	0.130919	0.0333148	0.361745
42.07	63.2	78.7	0.532259	0.163231	0.574167	28.25	79.05	59.6	0.060291	0.0456078	0.210371	17.6	50	60.6	0.129522	0.0351229	0.370647
37.7563	61.5	74.5	0.466969	0.154848	0.532551	28.3	75.85	54.1	0.0631352	0.0428937	0.18913	15	48.9	59.9	0.114944	0.0313573	0.355511
39.2426	62.3	70.3	0.484231	0.163973	0.501305	26	76.55	53.8	0.0572543	0.0430059	0.200174	19.5	49.3	56.7	0.152065	0.0319824	0.336028
39.7289	59.9	73.2	0.48154	0.150644	0.51533	26.45	73	57.4	0.060852	0.0400232	0.210319	16.6	49.6	55.6	0.123922	0.0332249	0.343759
35.8153	60.6	70.4	0.440952	0.150339	0.501715	24.2	72.25	50.4	0.0517343	0.0390268	0.179352	18.6	48.8	62.6	0.149814	0.0311917	0.378686
41.8016	61.3	66.6	0.532194	0.148788	0.482916	24.35	69.6	58.4	0.0543879	0.0366382	0.213157	17.8	49.7	58.5	0.138697	0.0346243	0.366281
45.9879	61.5	70.6	0.584105	0.147057	0.506272	26.35	66.25	55.9	0.0602881	0.0329919	0.203765	16	48.7	52.1	0.125213	0.0310029	0.311071
38.8742	60	72.7	0.485167	0.144802	0.529474	26.45	65.95	55	0.0579575	0.032517	0.208705	15.6	49.5	56.6	0.116734	0.0330207	0.335119
41.1606	57.7	75.7	0.506824	0.136305	0.555114	23.3	64.3	54	0.048239	0.0313978	0.204547	16.8	49.6	59.7	0.120889	0.0334365	0.37467
38.3469	58.8	71.5	0.475574	0.140572	0.514045	24.65	63.2	54.3	0.0558542	0.0297152	0.197023	19.9	49.8	57.3	0.155993	0.0336663	0.354176
39.3332	56.7	70.5	0.4788	0.132347	0.518104	21.45	61.3	52.8	0.0455259	0.0276164	0.193845	21.7	49.1	59.7	0.167087	0.0317727	0.355038
38.0195	58.6	68.4	0.474879	0.133593	0.479618	19.65	60.05	53.9	0.0440516	0.0260148	0.190066	16.8	50.6	61	0.131193	0.0363932	0.365577
42.6058	59.2	70.9	0.523841	0.141232	0.507328	19.9	58.8	52.4	0.0431687	0.0254748	0.200014	16.4	50.3	63.1	0.131339	0.0351468	0.390487
40.8922	56.3	73.8	0.5018	0.130327	0.53435	22	58.3	55.3	0.047718	0.0242918	0.201789	18.9	49.9	62.5	0.146478	0.0348984	0.384531
39.4785	58.2	70.1	0.479352	0.141126	0.521872	20.7	56.6	50.2	0.0453094	0.0225569	0.184972	19.9	49.4	62.9	0.156044	0.0335261	0.384386
41.1648	57.8	76.1	0.51349	0.134903	0.550608	18.3	57	51.4	0.0398904	0.023713	0.195674	17.9	49.6	62.2	0.1331	0.0330908	0.374658
43.1511	58	63.9	0.527909	0.13698	0.465235	20.05	56	49.9	0.0426401	0.0223777	0.180755	16.5	50.6	59.7	0.126954	0.0352493	0.360282
42.8375	56.8	70.2	0.52915	0.13069	0.503917	15.75	53.8	48.6	0.036532	0.0198842	0.178959	19.2	49.3	62.9	0.14632	0.0328334	0.371247
35.3238	58	65.9	0.44272	0.134206	0.484895	20.3	54.5	48.5	0.0448006	0.0206578	0.181623	17.8	50.7	59.8	0.140242	0.0365802	0.35524
40.3101	57.4	66.2	0.50409	0.130141	0.458957	19.9	52.85	51.6	0.0443081	0.0191944	0.193403	19.8	50.6	62.6	0.152695	0.0357888	0.373412
37.5964	56	64.4	0.462963	0.124147	0.458732	18.9	52.2	48	0.0414179	0.0186976	0.173709	17.5	49.7	61.9	0.131309	0.0338227	0.371716
36.6827	56.9	69.7	0.461229	0.127972	0.480517	16.45	52.15	50.6	0.0361699	0.018506	0.185214	18.4	49.8	59.1	0.141003	0.0340112	0.35996
36.6691	57	66.2	0.447847	0.137179	0.467162	14.9	51.05	47.6	0.0338553	0.0170612	0.173944	19.2	49.7	61.8	0.147858	0.0333031	0.385239
41.8554	59.2	66.2	0.538297	0.131462	0.46632	17	52.55	49.2	0.0355038	0.0188237	0.185208	15.9	50	61	0.121434	0.0342759	0.372992
39.3417	54.9	67.2	0.477614	0.119527	0.493005	17.85	52.1	46.6	0.0389581	0.0182368	0.164059	17	50.8	62.4	0.125837	0.0374916	0.389378
39.528	56.8	67.8	0.504448	0.120218	0.483167	19.4	49.4	48.3	0.0403904	0.015673	0.183092	18.8	49.8	61.8	0.146184	0.0337896	0.371578
38.5144	57.5	70.6	0.476155	0.137045	0.508559	17.85	50.4	45.3	0.0374255	0.0166253	0.167825	17.4	50.3	57.5	0.133023	0.0346389	0.359155
34.1007	55.9	64.1	0.416618	0.126491	0.467949	16.65	50.2	50.5	0.0367847	0.0162747	0.179966	15.8	49.9	63.5	0.118527	0.0349957	0.382845
33.687	57	63.7	0.419031	0.12532	0.466057	16.6	48.9	45.9	0.0380496	0.0151459	0.172813	21.5	50.7	65.9	0.153899	0.0361742	0.407719
37.4733	56.8	61.2	0.464906	0.129708	0.44642	14.75	49.85	47.8	0.0304277	0.0161858	0.174462	19	50.9	63.7	0.148491	0.0364809	0.389935
38.3596	56	65.4	0.477843	0.123438	0.480844	17.95	46.95	45.5	0.0410168	0.0130923	0.164399	17.4	50.5	57.6	0.128381	0.0344369	0.360843
36.446	53.8	62.2	0.444793	0.116792	0.459536	15.65	47.75	54.3	0.0338829	0.0137309	0.199114	21.4	51.5	63.1	0.16442	0.0375868	0.387585
35.0323	58.6	64.1	0.441293	0.134525	0.461242	19.3	48.8	51.7	0.043077	0.0149265	0.185438	20.2	51.8	63.3	0.156099	0.0383303	0.379864
37.2186	56.8	69.6	0.456445	0.130541	0.507831	16.05	48.3	48.8	0.0364665	0.0140458	0.180592	18.5	51.1	60.7	0.147209	0.0362442	0.371906
38.9049	55.3	64.6	0.478789	0.126811	0.453042	16.4	47.5	44.9	0.0365544	0.0135637	0.169873	18.6	50.6	69.2	0.141518	0.0362372	0.426082
34.7913	55.4	64.3	0.425975	0.120953	0.471753	17.15	47.55	46.7	0.0355498	0.0135742	0.171675	18	51.7	63.7	0.144713	0.037171	0.386784
35.3776	55.1	63.3	0.437473	0.11547	0.468356	12.45	47.6	44.1	0.0258272	0.0138775	0.164395	17.6	50.6	62.7	0.134274	0.0356712	0.389646
33.8639	54.7	63.4	0.412003	0.123813	0.463528	16.6	46.25	47.6	0.0337624	0.0117995	0.173906	21.3	50.8	65.9	0.167013	0.0364272	0.398607
36.1502	55.5	54.4	0.443593	0.120697	0.391015	13.85	47.3	45.5	0.0300036	0.0131512	0.167843	20.7	51.1	63.8	0.156231	0.0365436	0.393834
35.3365	55.3	68.2	0.441927	0.117727	0.504988	13.3	46	44.5	0.0290806	0.0123535	0.161943	19.2	53.2	61.2	0.152967	0.0413771	0.360384
33.1229	54.6	65.4	0.414871	0.11383	0.464131	14.75	46.95	51.9	0.0315855	0.013154	0.188144	19.3	52.6	67.8	0.149764	0.0389844	0.406908
34.9092	54.3	63	0.432389	0.116638	0.451338	15.1	45.8	42.9	0.0320658	0.0121066	0.156844	19.6	53.2	64.1	0.147711	0.0414032	0.39582
34.7955	56.1	62	0.42623	0.128052	0.429071	13.25	45.4	49.2	0.0288865	0.0111045	0.176332	20.2	53.4	68.5	0.154094	0.0424969	0.412724
31.5818	55.6	64.3	0.394676	0.120152	0.472978	16.45	45.85	46.9	0.0356909	0.0120787	0.165709	19.2	51.4	62.6	0.149934	0.0382561	0.367229
34.9682	55.8	68.1	0.433066	0.125764	0.470416	15.15	45.2	45.2	0.0312664	0.0113012	0.157364	21.6	52.3	65.2	0.163023	0.0391611	0.403643
33.9545	53.2	60.9	0.425908	0.110483	0.428266	14	45.95	49.5	0.0313513	0.0119196	0.179869	18.6	52.7	67.8	0.142576	0.0410957	0.417041
31.9408	55.9	63.7	0.402809	0.121243	0.458638	12.05	44.85	44.2	0.0269235	0.0108182	0.158519	21.7	52.6	63.2	0.168158	0.0415069	0.393587
31.9271	54	60.2	0.389333	0.115501	0.440985	13.9	44.65	48.4	0.030239	0.0103178	0.175453	20.2	52.1	67.9	0.149788	0.0398099	0.406848
35.8134	54.9	60.8	0.458104	0.109701	0.432353	17.65	45	46.3	0.0394809	0.0111341	0.173811	17	52.5	67.4	0.125839	0.04015	0.41632
37.2998	54.7	58.5	0.462681	0.118366	0.418255	14.7	44.8	51.3	0.0294539	0.0108845	0.192326	18.3	53.3	63.3	0.143352	0.0416959	0.391528
30.6861	52.5	60.6	0.373061	0.107742	0.435065	15.55	45.65	44.2	0.0358107	0.0115544	0.157448	17.8	51.6	68.6	0.134494	0.037973	0.415058
33.0724	54.5	66.6	0.40718	0.118867	0.490758	13.65	44.35	41.1	0.0288572	0.0103165	0.151024	20.1	52.4	71	0.156401	0.0397739	0.427498
33.2587	56	61.3	0.40522	0.12953	0.425633	14.9	44.1	43.1	0.0315792	0.0100813	0.156182	17.8	52.8	69	0.138746	0.0411615	0.424717
32.7451	54.5	60.3	0.413701	0.113855	0.427854	15.55	43.7	42	0.0324837	0.00932664	0.15724	19.7	53.4	66.9	0.16114	0.042598	0.417833
35.2314	55.6	63.7	0.442958	0.119484	0.453935	13.4	44.05	43	0.0304652	0.0100537	0.155503	18.8	53.9	72.9	0.148014	0.044358	0.448376
33.1177	55.3	60.8	0.426613	0.11064	0.425906	14.2	44.25	39.1	0.0316571	0.0103386	0.142196	18.9	52.9	66.4	0.143799	0.0411607	0.409081
36.804	54.4	61.6	0.447157	0.122851	0.447815	11.8	44.1	46.8	0.0248454	0.00998976	0.160066	20	53.7	68.9	0.15451	0.0436004	0.416821
34.5903	54.1	58.5	0.425436	0.118481	0.426453	14.1	43.65	46.6	0.0318009	0.00934859	0.165703	22.2	52.8	62.8	0.17561	0.041561	0.387971
33.4767	53.4	60.5	0.409767	0.114845	0.42629	13.25	43.9	42.7	0.0278189	0.00999968	0.155199	19.1	52.9	66.9	0.146442	0.0414039	0.40719
33.563	53	59.6	0.425269	0.105276	0.427645	12.55	43.65	44.5	0.0282324	0.00934768	0.162654	22.7	52.7	72.4	0.175201	0.0412242	0.445313
32.9493	55.5	63.6	0.414482	0.119883	0.436178	14.65	43.15	42.1	0.032216	0.00913288	0.149547	19.2	55	70.2	0.143208	0.0460472	0.436782
32.5356	54	61	0.410527	0.112574	0.419829	13.3	43.15	42	0.0292171	0.00929272	0.152702	20.2	55.3	69.5	0.152995	0.0469763	0.435739
29.4219	53.5	59.5	0.365691	0.113128	0.407564	13.45	43.5	42.3	0.0294854	0.00968888	0.151785	22.2	53.8	70.1	0.169953	0.0426363	0.426642
33.3083	53.6	59	0.414005	0.112068	0.432329	11.7	43.4	43.5	0.0257537	0.00942722	0.158823	20.9	53.4	74.9	0.158948	0.0426096	0.458296
31.4946	52.8	60.3	0.384349	0.11083	0.424999	14.2	43	47.4	0.031307	0.0090436	0.16826	22.9	54.9	77.1	0.171192	0.045616	0.46586
31.3809	53.6	57.3	0.397605	0.106848	0.39716	13.35	42.65	42.1	0.0294235	0.00805954	0.158725	20.5	54.2	71	0.1569	0.0441053	0.430906
32.8672	54.1	57.1	0.398665	0.115981	0.406806	11.9	43.1	46	0.0244751	0.00908381	0.162851	18.9	54.1	78.2	0.146271	0.0443465	0.487255
33.5536	53.7	62.7	0.419443	0.113897	0.451973	14.75	42.2	41.8	0.0320989	0.00826479	0.158661	19.7	54.2	68.2	0.14782	0.0435086	0.419312
34.3399	52.3	59.9	0.423678	0.107426	0.418419	14.3	42.75	44.5	0.0309189	0.00877377	0.15994	17.5	55.3	76.5	0.137724	0.0480238	0.478085
35.2262	51.9	62.9	0.431731	0.106411	0.42565	13.75	42.6	39.8	0.0298748	0.00857431	0.14589	23	54.8	68.5	0.172723	0.0468927	0.398566
30.0125	54.7	57.2	0.375511	0.11601	0.420104	13.95	42.55	46	0.0293303	0.00807372	0.165145	20.2	56	66.5	0.160449	0.0482159	0.403502
29.7988	52.4	61.9	0.365791	0.107511	0.437083	15.1	42.95	39.6	0.0324175	0.0088661	0.147834	20.8	55	73.4	0.160669	0.0470232	0.440793
34.1852	51.8	60.1	0.419555	0.104767	0.415655	13.45	41.95	45.4	0.0293999	0.00786824	0.160413	20	55.8	67.6	0.14851	0.0474382	0.417447
30.8715	55.6	57.1	0.395346	0.117547	0.411763	13.85	42.05	38.3	0.0297859	0.00795258	0.138415	21.9	56.8	75.8	0.164834	0.0512711	0.468071
33.9578	53.5	54	0.427623	0.109723	0.375408	14.6	42.55	41.8	0.03155	0.00855923	0.154336	20.9	57.3	72.2	0.156145	0.0521557	0.435157
32.7441	51.5	56.3	0.400839	0.102843	0.411659	12.45	42.1	42.3	0.0247773	0.00803071	0.152194	21.6	56.4	75	0.167853	0.0488986	0.45895
32.5305	52.6	62.6	0.411397	0.103392	0.439696	12.8	41.8	44.6	0.0276477	0.00770205	0.164538	21.9	58.1	72.3	0.167573	0.0538275	0.447975
31.3168	54.3	56	0.386808	0.120876	0.39841	13.95	41.85	46.7	0.0269553	0.00782916	0.166092	21.7	58.3	76.7	0.171541	0.0540481	0.478829
30.1031	52.8	60.8	0.37019	0.111087	0.42419	13	42.65	44.7	0.0299782	0.0087572	0.169958	22.8	60.1	79.3	0.165748	0.056664	0.4793
29.0894	52.7	61.5	0.359213	0.10882	0.44024	12.25	41.9	42.4	0.025636	0.0078276	0.153235	18.6	60.8	73.4	0.141544	0.059075	0.456334
30.7757	54.9	58.1	0.392324	0.114187	0.407025	11.6	41.8	46.7	0.0260372	0.00786875	0.171439	22.4	59.5	72.1	0.169666	0.0569719	0.433164
31.3621	52.8	59.2	0.389322	0.108971	0.408312	13.2	41.85	37.3	0.0293492	0.00783162	0.12991	23.4	59.7	73.8	0.173656	0.0562348	0.438979
28.4484	55.2	54.7	0.351191	0.121892	0.396066	11.7	41.75	47.5	0.0240672	0.00794198	0.169914	24.1	61.5	81.6	0.183818	0.0601994	0.488624
31.8347	54	54.4	0.40034	0.109541	0.382456	12.4	42.25	41.4	0.0260278	0.0081706	0.157793	25.5	60.3	76.9	0.194069	0.0577196	0.465043
28.921	53.2	58.4	0.357694	0.112846	0.412415	12.45	41.95	42.8	0.0273694	0.00798834	0.154796	25.1	61.6	74.2	0.200018	0.061326	0.450295
28.8073	54.7	58	0.36524	0.114916	0.408234	15.75	41.6	41	0.0355622	0.00766677	0.148921	23.6	63.6	75.6	0.175076	0.065371	0.457905
28.0937	53.6	57.8	0.351423	0.109452	0.411816	10.7	42.35	41.2	0.0203178	0.00836464	0.149143	24.5	64.2	77.5	0.196252	0.0673658	0.479886
30.28	54	54	0.381131	0.112112	0.372751	11.4	41.8	42.4	0.0259338	0.00757385	0.157382	25	65.5	72.6	0.197489	0.0705663	0.423006
30.2663	53.6	58	0.387069	0.107896	0.410682	12.15	41.9	40.2	0.0267241	0.00782735	0.145179	22.6	66.3	78.6	0.164191	0.0718117	0.483973
31.5526	52.8	57	0.395053	0.108585	0.401098	11.25	41.95	39.6	0.0224079	0.0080079	0.137422	26.7	67	70.2	0.205843	0.0732286	0.430687
32.939	52.2	53.9	0.412094	0.103079	0.391753	12.3	40.95	42.7	0.0266732	0.00680947	0.147457	24.7	66.3	79.2	0.182851	0.071611	0.490588
32.5253	50.8	61	0.396117	0.105204	0.418803	12.5	41.2	39.8	0.0267451	0.00736929	0.142261	20.5	67.6	76	0.164553	0.076688	0.467204
31.3116	52.6	58.7	0.393882	0.106482	0.415451	13.35	41.4	41.9	0.0273717	0.00758827	0.146318	25.6	72.1	81.4	0.194795	0.0847957	0.501233
32.2979	51.8	57	0.398478	0.102492	0.41389	13.65	41.8	46.3	0.028319	0.00794576	0.164605	27.7	73.3	74.7	0.214301	0.0869758	0.470259
28.8842	52.8	55.6	0.359336	0.108892	0.402878	12.5	41.3	43.4	0.0275967	0.00718925	0.156334	25.9	73	81	0.200465	0.0883328	0.491608
30.7706	51.1	58	0.374373	0.102984	0.403876	11.2	41.9	44.6	0.0225268	0.00775683	0.167947	24.1	76.4	83.6	0.185324	0.0947742	0.52313
32.2569	53.1	55.1	0.418492	0.103035	0.395161	12.25	41.6	39.3	0.02738	0.00771292	0.142252	29.8	79.5	77.9	0.232854	0.103139	0.483829
32.4432	52.9	59	0.408343	0.10508	0.41191	11.55	41.4	37.1	0.0245643	0.00708485	0.127379	25.2	80.5	77.2	0.196031	0.105754	0.47708
29.1295	51.2	53.8	0.358682	0.100309	0.388063	11.7	40.8	39.8	0.0266562	0.00674891	0.147952	30.5	80.7	84.6	0.229476	0.107068	0.51526
33.3158	52.7	57	0.415008	0.106806	0.399182	12.55	40.8	40.3	0.0272858	0.00657984	0.148651	31.1	86.5	85.7	0.238618	0.119176	0.529485
32.2022	49.9	54.7	0.394945	0.0944489	0.391482	11.45	41.25	45.8	0.024671	0.007166	0.170319	31.3	89.7	85.5	0.237166	0.125987	0.520275
32.0885	52.4	54.6	0.402833	0.103077	0.371151	11.7	40.8	40	0.0239437	0.00687878	0.145957	29.6	95.9	88.2	0.231789	0.138896	0.538062
29.0748	51.2	61.1	0.355219	0.103933	0.434559	10.5	40.75	39	0.0220421	0.00646047	0.140761	31.9	100.2	83.6	0.252023	0.149771	0.509429
30.2611	52.5	57.8	0.38421	0.103472	0.406533	11.4	41.7	35.8	0.02495	0.00766183	0.135137	34.5	103.5	91	0.257445	0.158506	0.56614
30.5475	49.9	55.5	0.371611	0.0980857	0.382586	11.4	40.8	38.9	0.0245532	0.00680632	0.140315	35.7	109.2	87.9	0.270075	0.173844	0.543773
29.5338	52.9	54.9	0.381194	0.102524	0.390783	12.9	40.75	39.7	0.0278836	0.00658348	0.139203	38.4	119.8	93.9	0.304459	0.195142	0.588743
29.6201	50.6	54	0.359123	0.103243	0.376823	11.95	40.95	39.5	0.0250102	0.00657765	0.14171	32.4	124.7	95.1	0.255399	0.208669	0.585745
32.5064	52.6	58.2	0.413705	0.103033	0.409308	11.5	41.75	34.6	0.0245742	0.0076552	0.123461	42.4	135.4	89.9	0.33081	0.232637	0.545225
28.9928	51.9	60.3	0.361462	0.103913	0.417118	12.1	41.55	39.1	0.0266614	0.00737281	0.141814	43.8	143.5	87.5	0.347369	0.252917	0.523783
25.2791	51.7	53.8	0.319336	0.102137	0.365848	12.65	40.65	39.2	0.0279565	0.00637965	0.142114	43.2	158.7	98.8	0.345202	0.289176	0.608685
27.6654	51.2	55	0.34888	0.0975447	0.379382	12.65	40.7	41.1	0.027303	0.00655265	0.152722	44.3	176.3	101.7	0.34184	0.328866	0.621288
28.2517	52.1	52.8	0.348924	0.108583	0.368984	13.05	40.75	37.9	0.0276184	0.00668813	0.136167	51	189.1	104.4	0.398172	0.361716	0.658474
28.638	51.2	55.2	0.360549	0.101269	0.38858	9.4	40.55	36.5	0.0198098	0.00622592	0.132262	57.7	212.4	102.1	0.462638	0.413589	0.622697
26.1244	51.4	56.6	0.337818	0.0989231	0.385891	11.05	40.6	38.8	0.0235628	0.00652746	0.133955	66	232.2	103.9	0.533764	0.457577	0.644108
29.7107	51.7	57.4	0.372821	0.102541	0.404581	9.9	41.1	37.2	0.0216663	0.00691242	0.136752	72	263.6	118.6	0.568672	0.535216	0.733153
28.197	51.1	51.6	0.352338	0.0955928	0.36213	11.95	40.95	39.3	0.0259186	0.0068416	0.14761	77.2	292.6	126.2	0.621672	0.600274	0.791551
30.0833	52.6	57.3	0.383322	0.109757	0.396685	8.4	41.2	40.6	0.0171854	0.00710493	0.145828	83.3	341.6	117.6	0.67489	0.708662	0.721489
30.8697	51.9	53.1	0.393938	0.102173	0.36462	9.95	41.25	42.1	0.0204494	0.00706211	0.145057	96.9	373.1	130.9	0.764832	0.778543	0.81381
30.056	51.3	53.5	0.379416	0.0991475	0.380256	13.1	41.05	37.4	0.0282519	0.00658511	0.139153	109.6	412.6	138	0.858013	0.873464	0.853796
28.5423	53.4	55.8	0.370066	0.106378	0.394177	11.4	40.3	39.7	0.0253097	0.00644702	0.140547	111.7	447.6	144.9	0.869243	0.94305	0.877986
33.4286	51.1	53.1	0.413421	0.103167	0.36546	12.5	40.35	36.3	0.0270481	0.00625617	0.127581	118	471.6	155	0.906458	1	0.954076
30.9149	51.4	54.9	0.38594	0.102197	0.395894	10.6	40.95	34	0.0215656	0.00708845	0.125882	116.1	449	140.1	0.901547	0.941817	0.866036
28.3013	49.9	55	0.346323	0.0974063	0.391509	11.25	40.2	37	0.0234846	0.00606962	0.130323	110	429.9	135.3	0.842855	0.894535	0.845611
26.6876	49.7	55.6	0.319019	0.100883	0.378988	10.25	40.8	37.2	0.0216784	0.00661712	0.133906	102	408.2	119.9	0.790036	0.836534	0.747929
30.5739	51.3	51.2	0.3834	0.0999772	0.358246	11.15	41.5	38.4	0.0242315	0.00737065	0.143924	83.7	377.3	107.7	0.634396	0.771205	0.658197
26.2602	50.6	55.2	0.332095	0.0979928	0.381967	9.7	41.45	40.4	0.0210591	0.00717503	0.148409	72	335.5	84	0.55268	0.675231	0.512563
29.3465	52.1	55.4	0.382774	0.0965664	0.393523	10.95	40.85	36.5	0.0218669	0.006985	0.13505	60.6	294.7	77.2	0.479983	0.577984	0.468372
28.4329	52.4	54.8	0.360734	0.105488	0.389029	11.1	40.3	34.8	0.0241145	0.00617802	0.122673	48.1	252.7	57.3	0.370946	0.486771	0.346918
30.1192	52.8	54.9	0.390505	0.102396	0.383057	11.45	39.95	38	0.0227765	0.00589359	0.140083	34.5	217	46.3	0.253843	0.40583	0.265493
27.9055	51	55.2	0.351982	0.0975652	0.383212	8.1	39.9	35.7	0.0162201	0.00552941	0.132867	29.9	182.4	36	0.23153	0.329668	0.205176
31.0918	51.1	47.8	0.391307	0.103326	0.337731	10.3	40.4	37.4	0.0213489	0.00633832	0.13793	24.4	155.1	27.6	0.188137	0.267855	0.16282
26.2782	49.3	56.6	0.316806	0.0984899	0.39054	10.65	40.5	31.1	0.0231194	0.00635333	0.112263	19.6	131.9	19.2	0.151024	0.218648	0.115326
28.3645	51.6	54.4	0.365059	0.101891	0.378675	11.2	40.45	38.5	0.0228076	0.00651352	0.137095	17.6	118.2	19.7	0.128561	0.186311	0.10655
28.8508	50.8	56.6	0.370004	0.0948425	0.402261	12.05	40.05	42.1	0.0261479	0.00590717	0.157306	13.9	104.9	15.6	0.0988438	0.155195	0.0851328
27.7371	50.8	57.9	0.350449	0.100375	0.397104	9.35	40.7	38.5	0.0197842	0.00670263	0.134443	13.9	95.8	14.3	0.0975784	0.133259	0.0771923
28.7234	50	53.1	0.358752	0.0942423	0.377845	9.9	40.65	36.1	0.0208081	0.00657162	0.128229	9.2	86.6	13.6	0.064365	0.117162	0.0738023
30.7098	50.9	48.5	0.393262	0.0995942	0.336441	11.9	40.85	40.4	0.0247416	0.00685463	0.149034	9.3	79.1	11.5	0.0719699	0.0994558	0.0610617
27.8961	47.3	53.4	0.342035	0.0861188	0.36416	11.8	40.35	39.2	0.0253198	0.00598634	0.145196	8.7	73.6	11.3	0.0615534	0.0890723	0.056246
25.6824	48.6	54.7	0.321178	0.08708	0.382879	9.6	40.6	42.2	0.021189	0.00631502	0.156296	6.2	68.2	10.8	0.040473	0.0756811	0.0553142
31.1687	50.5	51.3	0.389453	0.0975242	0.341506	12.45	39.75	36.5	0.0259377	0.00569296	0.127876	6.2	64.8	11.7	0.0467926	0.0668827	0.0634872
27.355	50.9	49.7	0.352706	0.0963565	0.342888	10.25	40.5	30.4	0.0225221	0.00657189	0.107991	7.9	63.1	7.6	0.0587527	0.0633171	0.0333157
27.2414	50.7	49.9	0.344945	0.0951038	0.348929	12.45	40.5	38	0.0263039	0.00634814	0.140006	5.5	59.7	9.2	0.03926	0.0565084	0.0505733
26.2277	50.2	48.3	0.335943	0.0923611	0.332328	10.75	39.9	38	0.0231731	0.00583884	0.133463	5.9	57.6	7.6	0.0425398	0.0507842	0.0365911
29.614	51.5	49.5	0.375063	0.101784	0.324897	11.65	39.8	36.5	0.0242455	0.00574553	0.13262	6.1	56.3	8.7	0.0414621	0.0479663	0.042764
28.3003	51.7	51.3	0.368528	0.0999511	0.36113	11.6	40.5	39.3	0.0243757	0.00646673	0.140216	5.1	53.6	6.5	0.0346537	0.04254	0.032424
25.2867	48.6	52.9	0.311432	0.0908594	0.367529	9.15	40.05	35	0.0189712	0.00601849	0.130818	4	53.9	7	0.0281751	0.0431589	0.0360886
27.373	51.2	54.6	0.348749	0.10013	0.379251	12.4	40.95	37.6	0.0279899	0.00704994	0.132173	3.1	51.6	6.1	0.0223949	0.0377763	0.0227799
29.6593	50.6	54.2	0.37661	0.0943682	0.380076	10.55	39.85	33.7	0.022455	0.0058195	0.126388	3.9	49.7	5.7	0.0273861	0.0329317	0.0258682
27.0456	49.9	50.7	0.335393	0.0966073	0.363033	10.45	40	36.2	0.0231835	0.00598372	0.132277	3.5	49.1	6.4	0.0233861	0.0323648	0.0304054
28.1319	49.3	49.3	0.354758	0.091061	0.342974	9.15	40.25	33.9	0.019992	0.00639355	0.120216	3.3	48.1	5.3	0.0225752	0.0296727	0.0177382
27.1183	52	53.8	0.345135	0.103079	0.36965	11.4	40	37.4	0.0251438	0.00572672	0.13399	2.3	47.8	7	0.0135333	0.0308529	0.0279952
28.2046	51.9	49.5	0.358627	0.104469	0.354926	8.55	40.15	33.7	0.0168039	0.00610474	0.123151	2.5	46.8	4.8	0.0140536	0.0260741	0.0197433
25.5909	50.4	54.9	0.318912	0.103668	0.392186	10.4	40.15	38	0.0210323	0.00602887	0.136782	3.1	46.7	4.1	0.0177925	0.0266994	0.0137493
27.4772	51	52.8	0.353236	0.0979316	0.37051	10.3	41	36	0.0219763	0.00700288	0.130177	3.8	43.9	5.7	0.0241411	0.0202869	0.0240123
26.4636	50.6	46	0.335286	0.0965315	0.319541	10.55	40.25	37.9	0.0213542	0.00638413	0.141415	3.3	44.2	4	0.0231145	0.020652	0.00946586
28.9499	49.7	53.2	0.368878	0.0917461	0.367066	12	39.75	33.6	0.0264395	0.00580713	0.119023	2.9	45.4	4.5	0.0197021	0.0240314	0.0170536
27.1362	51.2	50.9	0.349702	0.0986543	0.357959	9.25	39.8	32.1	0.0203276	0.00575673	0.115693	2	42.5	4.8	0.0129093	0.0171368	0.0188312
25.9225	49.7	56.1	0.341606	0.0910096	0.400555	10.85	39.95	31.5	0.0232721	0.00601632	0.110014	1.4	42.2	4.3	0.00797407	0.0163672	0.00997792
23.7088	50.9	53.3	0.307079	0.0956207	0.385075	13	40.4	37.5	0.028222	0.00635932	0.136965	2.3	42.9	4.3	0.0128591	0.0179128	0.0168423
26.8952	49.4	46.5	0.339173	0.0946453	0.309817	10.05	39.9	37.5	0.0210301	0.00572059	0.132184	1.2	42.7	4.4	0.0034806	0.0176485	0.0181739
24.5815	51.3	49.3	0.326829	0.0964179	0.335066	12.25	39.25	36.8	0.0255913	0.00508593	0.138809	1.1	41.4	3.7	0.00237907	0.0147559	0.0121776
30.5678	51.1	54.7	0.393873	0.0977038	0.387494	11.25	41.2	36.3	0.0249037	0.00721753	0.129845	1.3	41.4	4.4	0.00425125	0.0140386	0.0154239
28.1541	49.7	55.5	0.365208	0.0897812	0.381851	10.8	40.3	38.7	0.0221055	0.00633928	0.145007	1.6	41.3	5.5	0.00703515	0.0142751	0.0264151
29.8404	49.1	47.3	0.379099	0.0871553	0.33275	11.3	39.35	38.7	0.024799	0.00533998	0.142305	0.9	40.8	3.4	0.00330133	0.012645	0.0118485
24.3268	50	52.4	0.309821	0.0970797	0.365251	11.6	40.6	37.5	0.0256573	0.00646218	0.131613	1.5	41.1	4.7	0.00862476	0.0132794	0.01814
25.0131	51.2	56.5	0.328247	0.0961307	0.402641	13.5	40	34.1	0.027813	0.00585627	0.127915	1.8	39.9	2.6	0.00976132	0.0110255	0.0036702
28.2994	48.7	47.4	0.358137	0.0891811	0.339272	10.25	39.85	34.9	0.0237207	0.00533239	0.125469	0.7	40.7	4.3	0.000804335	0.0132904	0.0173411
27.3857	49.4	53.3	0.351931	0.0898388	0.377593	9.85	40.7	30.7	0.0212339	0.0066035	0.114812	2.1	40.7	5.7	0.0111834	0.0118042	0.0265612
27.0721	49	52.3	0.337923	0.0920487	0.368839	9.75	39.95	32.4	0.0200994	0.0057959	0.117874	1.7	40.2	3.7	0.00921073	0.0120322	0.0133046
24.4584	51.1	51.3	0.317563	0.0958248	0.357713	10.15	40.2	31.7	0.0202917	0.00609655	0.111668	1.5	39.7	3	0.0081417	0.0102893	0.00975861
26.2447	50.1	54.5	0.331933	0.0970299	0.386775	11.4	40.2	41.9	0.0245038	0.0060917	0.160192	1.3	39.3	4.2	0.00713114	0.00981343	0.012721
26.231	49.1	52.3	0.329961	0.0906394	0.369898	12.35	39.95	32.1	0.0279237	0.00592463	0.117701	1.5	38.9	3.3	0.00687998	0.00902301	0.0115814
27.1173	50.1	51.3	0.361272	0.0903123	0.358371	9.95	39.7	37.8	0.0204569	0.00572845	0.136113	1.3	39	3.5	0.00578686	0.0092424	0.00942041
24.2037	49.7	46.7	0.307323	0.0918214	0.319679	10.75	39.6	39.8	0.0242566	0.00538843	0.148824	1.5	38.7	3	0.00747377	0.00810853	0.00721709
25.99	50.6	52.4	0.328606	0.0978112	0.360337	11.65	40.1	37.8	0.0251172	0.00622238	0.139516	1.4	39.3	4	0.00611953	0.0100302	0.0160919
27.3763	50.7	52.1	0.354888	0.0968854	0.369179	9.6	39.6	38	0.0204944	0.00563951	0.138195	1.2	38.9	3.2	0.00298904	0.00813973	0.0083767
25.6626	49.6	49.1	0.323848	0.0945639	0.34325	9.2	40.2	33.2	0.019302	0.00610507	0.121998	1.8	39.2	3.6	0.0104192	0.00978631	0.0116203
25.249	49.5	49.3	0.326884	0.091336	0.344197	10.35	40.4	33.5	0.0217844	0.00618938	0.123358	1.5	39	3.5	0.00605205	0.00849705	0.00838633
24.2353	49.7	52	0.306216	0.0972257	0.364245	11.35	40.15	32.8	0.02252	0.00614406	0.123764	1.4	38	4.4	0.00639945	0.00673444	0.0189859
25.5216	49.1	53.2	0.324628	0.0924919	0.356711	8.65	39.9	31.2	0.0167073	0.0057341	0.117186	1.3	38.8	2.5	0.00594861	0.00842296	0.00579732
26.9079	50.7	53.5	0.352389	0.094845	0.36975	11.05	40.4	32.5	0.0237919	0.0064459	0.115582	1.5	37.8	3.2	0.0061459	0.00651244	0.00954093
22.2942	48.7	49.8	0.29161	0.0866273	0.338615	11.45	39.95	36.1	0.0241958	0.00576393	0.131948	0.9	38.6	4	0.00242668	0.00811768	0.014531
23.7806	48.9	50.9	0.304304	0.0918895	0.359539	10.5	40.4	35.2	0.022194	0.00621396	0.12557	1.5	37.9	3.9	0.00636147	0.00634821	0.0147587
29.4669	49.8	47.7	0.376111	0.0926966	0.330081	10.75	39.7	33.6	0.0233528	0.00539439	0.123484	1.3	38.7	3.2	0.00691213	0.00874002	0.00975902
25.1532	49.3	50.5	0.322338	0.0909609	0.344705	11.8	39.75	35.6	0.0246001	0.00592784	0.133026	1.1	38.4	3.5	0.00343922	0.00688417	0.00926174
23.8395	50.7	55.2	0.302466	0.0997783	0.386269	10.45	40.35	32.1	0.0224328	0.00615241	0.115592	0.6	37.8	3.9	-8.87899e-05	0.00595761	0.0134781
28.1259	49.6	51.1	0.365853	0.0883288	0.3529	9.25	40.15	33.7	0.018352	0.00602761	0.122414	0.9	37.4	3.5	0.000996586	0.00505618	0.0132645
27.9122	49.1	52.3	0.355333	0.0913629	0.359152	10.4	40.3	34.2	0.0204736	0.00609585	0.126018	1.4	37.6	5.4	0.00769335	0.00534581	0.0231724
24.5985	48.4	46.7	0.305367	0.091438	0.339092	10.9	40.55	31.3	0.0235916	0.00673137	0.108575	0.9	37.4	2.6	0.00352032	0.00514425	0.00678402
23.6848	50.4	50	0.31311	0.0937572	0.347277	9	39.7	32.8	0.0194654	0.00563924	0.115858	1.2	37.4	2.8	0.00568837	0.00498541	0.00232445
27.4712	48.5	52.6	0.338428	0.0950892	0.356771	10.65	40.25	27	0.0224221	0.00627736	0.0936546	0.8	38.1	4.8	0.00248091	0.00688094	0.0145232
26.9575	49.2	52.7	0.350984	0.0907069	0.381445	11.8	40.1	38.8	0.0260217	0.00583572	0.142564	1.1	37.6	3.7	0.00470385	0.00529925	0.0101006
26.8438	49	50.2	0.348929	0.0889437	0.354871	10.6	40.55	32.4	0.023161	0.00647431	0.117649	1.7	36.9	2.7	0.00609914	0.00378626	0.00604432
24.5301	49.2	51.3	0.319116	0.0896181	0.357073	11.6	40.6	32.7	0.0245386	0.00653345	0.115556	0.8	37.7	2.1	0.00162209	0.00599232	-0.00312928
27.1164	50.2	50	0.35034	0.0962973	0.358212	9.35	39.7	32.9	0.0210408	0.00578558	0.116466	0.3	37.3	2.9	-0.00192133	0.00518811	0.00804277
24.6028	49.7	48.5	0.313689	0.0953044	0.338686	10.05	40.35	34	0.0221901	0.0063163	0.122317	0.5	37.3	2.6	1.48345e-05	0.00522837	0.0066483
22.4891	50.6	50.8	0.304285	0.0903519	0.356827	9.5	39.95	34	0.019651	0.00619147	0.127675	1.3	37	1.9	0.00669774	0.00444131	0.00207644
24.8754	48.9	54.7	0.313558	0.093666	0.375143	9.55	40.1	32.1	0.0211549	0.00598953	0.119662	0.9	37	2.6	0.00393387	0.00479831	0.0049676
26.2617	49.8	48.6	0.347818	0.0857293	0.342579	9.95	39.9	35.7	0.0225561	0.00600378	0.131588	0.8	36.8	2.9	-0.00259093	0.0039612	0.00438732
26.748	48.8	51.3	0.344013	0.0890903	0.36347	9.8	39.8	33.1	0.0212005	0.00586547	0.12261	1	37	3.1	0.00380334	0.00451532	0.0102973
25.4344	50.3	49	0.3271	0.0991838	0.335645	12.2	39.75	36.7	0.0246563	0.00568654	0.131301	0.8	36.6	2.2	0.000555812	0.00373411	0.000937582
23.6207	49.1	45.1	0.305929	0.0906061	0.305911	10.55	39.7	30.1	0.0214528	0.00563013	0.108896	1.4	36.6	1.8	0.00696365	0.00330797	0.000230764
26.007	49	48.5	0.335141	0.093737	0.341542	7.8	39.25	30.9	0.0162856	0.00515547	0.108003	1.4	37.3	2.7	0.00685212	0.00514172	0.00399535
25.0933	49.3	47.3	0.325225	0.0911364	0.312964	10.65	40.4	32.9	0.0244116	0.00646778	0.121678	0.9	37	2.2	0.00332279	0.0045745	0.00329549
28.1797	48.1	51.3	0.357435	0.0868275	0.356237	10.6	38.85	32.6	0.0217556	0.00465931	0.115586	1.5	36.6	2.8	0.00678433	0.00377034	0.00433775
24.066	49.2	49.7	0.315391	0.0867489	0.339497	8.9	39.65	34.2	0.0187288	0.00573209	0.122905	0.6	36.7	2.2	-0.000412727	0.00380824	0.00283991
28.4523	50.4	52.1	0.366882	0.100125	0.362649	10.75	38.8	35.1	0.0211033	0.00473078	0.125459	0.8	37.3	3.7	0.00250411	0.00476985	0.012271
26.5386	49.5	49.8	0.335371	0.0975844	0.348301	10.85	39.3	35.3	0.0244462	0.00518549	0.12493	0.1	37.2	2.7	-0.00352151	0.00516041	0.00680264
28.3249	49	51.7	0.368891	0.0892993	0.351212	9.6	39.35	31.1	0.0209015	0.00521143	0.111917	0.8	36.7	2.2	0.00140308	0.0039654	0.00213143
24.0113	49.8	51.2	0.314228	0.0947294	0.35735	9.7	39.8	34.3	0.020295	0.00562137	0.125205	0.9	36.9	2.6	0.00125708	0.0040718	0.0044642
23.5976	49.6	51.8	0.307171	0.0951612	0.353772	8.8	39.8	34.6	0.0189411	0.00561284	0.124084	0.8	36.9	1.8	0.0015283	0.00375831	0.00190772
23.2839	49	48.5	0.301175	0.0905906	0.353427	9.85	40.35	35.2	0.0217037	0.00638072	0.127746	0.7	36.8	1.9	0.00137265	0.00384301	0.00215284
22.5702	49.8	46.2	0.29707	0.0926593	0.325484	9.75	39.5	32.3	0.0203078	0.00529222	0.120528	0.3	36.1	1.8	-0.00152976	0.00224564	-0.00113549
20.3565	49.7	43.4	0.273584	0.0913702	0.29135	8.7	40.2	29.1	0.0193679	0.0060944	0.104703	1.1	37.1	3.7	0.00466045	0.00478598	0.0134784
22.1429	48.8	46.1	0.288577	0.09085	0.3265	10.85	40.35	32.9	0.0225355	0.00627035	0.124716	0.4	36.7	2	-0.000830712	0.00377213	0.00323171
27.1292	48	46.3	0.344781	0.0890283	0.318536	9.45	40.15	29.7	0.0191748	0.00589062	0.107599	1	36.8	2.1	0.00359433	0.00371585	0.000568525
23.7155	49.4	47.6	0.302342	0.0976398	0.330124	10.6	40	32.6	0.021897	0.00583532	0.112784	0.6	36.8	2.4	-0.000146835	0.00384361	0.00349512
22.1018	49	50.3	0.284807	0.0944472	0.3462	9.9	39.2	31.6	0.0205282	0.00517587	0.116187	1.4	36.6	1.9	0.00603653	0.00348846	0.00105389
25.1882	49.3	46.1	0.329298	0.0919975	0.328051	11.3	39.75	31.7	0.0244679	0.00557977	0.114397	0.9	36.5	1.3	0.00302667	0.00302966	-0.00396584
23.9745	49.8	51.3	0.322857	0.0869207	0.359704	10.3333	39.7778	34.8889	0.0177731	0.0013678	0.108401	0.8	36.5	1.6	0.00237384	0.00281557	-0.000226301
24.2608	48.3	48.1	0.312127	0.0894904	0.34385							1	36.2	2.4	0.00255924	0.00247019	0.00503323

## Sheet: Talin_Vn2A
Tn_Vn2A_A						Tn_Vn2A_B						Tn_Vn2A_C
n=9						n=10						n=10
Raw averages			Normalized			Raw averages			Normalized			Raw averages			Normalized
594 (Vn)	647 (Tn)	488 (actin)	594 (Vn)	647 (Tn)	488 (actin)	594 (Vn)	647 (Tn)	488 (actin)	594 (Vn)	647 (Tn)	488 (actin)	594 (Vn)	647 (Tn)	488 (actin)	594 (Vn)	647 (Tn)	488 (actin)	Distance between Tn peak/actin peak
1.125	32.625	1.375	0.00279256	-0.0142395	0.0118049	1	33.5	3.7	0.00212041	0.00672915	0.00679365	1.3	36.9	3.3	0.00316866	0.00167828	0.00881348	A	B	C
0.25	32.25	3	-0.00288189	-0.0186989	0.0185531	1.1	33.2	1.5	0.00342827	0.00249239	-0.000330593	1.3	37.4	1.9	0.00202072	0.00384202	0.00414933	0	-0.137	0.274
1.375	32.875	3.875	0.00391073	-0.0122816	0.0215223	0.8	33.5	2.2	0.00254014	0.0040346	0.00312883	0.9	37.2	0.8	0.00105907	0.00308643	-0.00939918	0	0	-0.137
1	32.25	2.875	0.00021132	-0.0177736	0.0189614	1	33.6	2.3	0.0047507	0.00548286	0.00240743	1.6	37.1	1.7	0.00278921	0.00292468	-0.000650633	1.233	-0.274	1.096
0.625	32.75	1.375	-0.00134574	-0.0138871	0.0125963	0.8	33.6	1.4	0.00157476	0.00759669	-0.0029669	1.5	37.3	2.5	0.00354164	0.0031223	-0.000496002	0	-0.137	-0.137
1.25	32.875	2.875	0.00671384	-0.0136564	0.0185445	0.9	33.7	3.2	0.00154162	0.00818697	0.00876709	1.2	36.8	2.8	0.00316858	0.00221398	0.00322837	0.137	0.411	0.274
1.25	32.875	2	0.00205482	-0.0133022	0.0171879	0.9	33.5	2.3	0.00520443	0.00540745	0.00515971	1.2	37.2	2	0.00123053	0.00287382	-0.00279797	0	0	0.959
1.25	32.75	2.875	0.00112968	-0.0152687	0.0176241	1.5	33.7	2.3	0.00944075	0.0078832	0.00360854	1.2	37.2	2.9	0.00234904	0.0022087	0.00501397	1.781	-0.274	0.411
1.75	32.5	2.75	0.00435781	-0.0144311	0.0165705	0.9	33.5	3	0.00173346	0.00782889	0.00526722	1.8	37.9	3.1	0.00312039	0.00398074	0.0151309	0.822	0.137	0.548
2	33.125	2.875	0.0055664	-0.0119075	0.0170283	1	33.6	3.6	0.00424828	0.00754541	0.00768433	0.6	37.7	2.7	0.000963554	0.00422798	0.0058203	0	0.137	2.603
1.5	32.25	2.125	0.00368631	-0.0158811	0.014678	1.7	33.8	1.5	0.00694278	0.00709511	-0.00113102	1.8	37.5	2.7	0.00266169	0.00303858	0.00636474		0.685	3.836
0.75	32.375	3.125	0.000564639	-0.0175462	0.0186177	1	34	2.6	0.00427836	0.0109803	0.00698996	1.8	37.8	1.8	0.00475498	0.00400474	-0.00202241	slices =0.137um
1.125	33	2.125	0.000778212	-0.0138354	0.0143468	0.8	34.1	1.9	0.00157812	0.0114836	0.00354324	1.1	36.9	2.6	0.00244333	0.00226729	0.00446127
0.875	32.875	3.875	-0.000436116	-0.0142551	0.0228024	1.5	33.5	1.7	0.00788857	0.00567132	-0.000849347	1.4	37	3	0.00300911	0.00221819	0.0114607
2.5	32.75	2.5	0.0084027	-0.0140693	0.0164428	1.8	34	3.1	0.00849291	0.0101776	0.00511949	1.3	37.9	2.3	0.00177876	0.00453551	0.00268202
1.75	32.625	2.625	0.00477803	-0.0151793	0.0172462	1.3	33.8	1.6	0.00288884	0.00899496	-0.00344438	1	38	1.6	0.00119614	0.00420107	-0.00437669
0.75	33	2	-6.26632e-05	-0.0132507	0.0140373	1.4	33.8	2.5	0.00645052	0.00902824	0.00444995	2.6	38.2	2.8	0.00733878	0.00446521	0.00384708
2.375	32.875	1.875	0.00788331	-0.013082	0.0146568	1	33.6	2.8	0.00465642	0.00458828	0.00378194	1.6	38.1	2.7	0.00488826	0.00502287	0.009239
1.625	32.75	3.5	0.00387964	-0.014421	0.0195508	1.6	33.8	1.4	0.00390274	0.00813817	-0.000906236	1.5	37.7	2.1	0.00220561	0.00369001	0.000167342
1.125	33	2.75	0.00104018	-0.0129804	0.0184031	1.1	33.8	2.4	0.00480564	0.00888376	0.0049072	2	37.4	2.7	0.00684794	0.00360684	0.00642802
1.875	32.5	3.75	0.00508589	-0.0158705	0.0208043	2	33.7	3.3	0.00984331	0.00622428	0.0089971	1.8	37.7	2.7	0.00291902	0.00335055	0.00238822
1.375	33.375	4.625	0.00189404	-0.0103847	0.0241683	1.3	33.6	2.3	0.00210941	0.00534856	0.00237839	1.3	38.1	2.9	0.00208981	0.00471536	0.00868768
2	32.5	3.25	0.008628	-0.0157246	0.0183211	0.6	33.8	2.4	0.000215919	0.00774752	0.00202197	1.2	37.4	3.1	0.00157007	0.00357777	0.007472
1	33.125	1.875	0.00222998	-0.0123341	0.0139386	1.4	33.9	1.9	0.00746221	0.00615017	0.00482135	2.1	38.5	2.6	0.00515894	0.00597036	0.00436185
1.25	33.5	4	0.00227211	-0.00933104	0.0206033	0.6	33.5	2.4	0.00139633	0.00516048	0.000186549	1.4	38.6	2.2	0.00246167	0.00530643	0.00302018
1.625	33	3.5	0.00517743	-0.0103766	0.0206992	1.3	33.7	2.9	0.00852535	0.009339	0.00415883	2.4	38.3	3.2	0.00662531	0.00461645	0.00509442
2.125	32.5	3	0.00655699	-0.0148131	0.0179818	2	33.6	2.7	0.011252	0.00618149	0.00465863	1.8	38.6	3	0.00565945	0.00584332	0.0165947
2	32.625	3	0.00498449	-0.0136118	0.021587	1.1	34.3	2.1	0.00459111	0.013551	0.00256021	1.8	38.4	2.7	0.00252447	0.00462937	0.00564331
2.5	32.75	4.625	0.00914354	-0.0132031	0.0253571	1.7	34.1	3.8	0.00738135	0.0113856	0.00842244	1.7	38.8	3.3	0.00488797	0.00599441	0.0101357
1.125	33	2.375	0.000437087	-0.0126572	0.0162274	1.9	33.6	2.9	0.0111268	0.00545808	0.00710153	0.9	38.6	3.3	0.00227452	0.0059572	0.00328084
1.875	33.25	2	0.00436339	-0.00851651	0.0173768	1.1	33.4	3.3	0.00336609	0.00605158	0.00376151	1.3	38.3	2.4	0.00211093	0.00455925	0.0079211
1.875	33	2.625	0.00607834	-0.0122216	0.0163242	1.9	34.3	2.8	0.0123256	0.0128511	0.0079604	1.8	39	3.2	0.00511995	0.00685706	0.0168959
1.75	32.75	3.375	0.0067341	-0.0140455	0.0201939	2.6	33.9	2.7	0.0158305	0.00866058	0.00673339	2.1	38.8	3.2	0.00503973	0.00458507	0.0107041
1.875	33.375	4.375	0.00474303	-0.00952407	0.0221685	2.2	33.9	3.2	0.0123545	0.00832546	0.00587062	2.2	38.8	2.7	0.00661642	0.00686488	0.00241179
1.625	33	2.875	0.00359752	-0.0124976	0.0174949	1.7	33.5	2.7	0.00861418	0.00663255	0.00369474	1.5	38.7	2.5	0.00296482	0.00551891	0.00895196
2.625	33.375	3.75	0.00984	-0.00891059	0.0220674	1.9	33.7	1.8	0.00976851	0.0062434	0.00223583	1.8	39.3	3.8	0.00320801	0.00680398	0.014409
2.125	33.875	4	0.00641975	-0.00515193	0.0213786	1.7	33.9	2.8	0.0104306	0.00863102	0.00449686	2.2	39.4	2.3	0.00633093	0.00677641	0.00336787
1.875	33	3.5	0.00639914	-0.012076	0.0198759	2.4	34	4.1	0.0124476	0.00995606	0.0145995	3	39.1	2.9	0.00955729	0.00615818	0.00539888
2.25	33.875	3.625	0.00784706	-0.00618552	0.0210948	2.4	34	3.3	0.015505	0.00964553	0.00642572	2.5	39.9	3.5	0.00562187	0.00877718	0.0103127
1.875	33.375	5.25	0.00663952	-0.0100137	0.0294573	0.9	34.7	2.3	0.00337392	0.0152164	0.000236165	1.2	38.9	4.1	0.00296211	0.00574141	0.0183321
1.625	33.125	3.375	0.00676776	-0.0106596	0.0184153	1.3	34.3	3.2	0.00642063	0.0122705	0.00779338	2.9	38.9	3.2	0.0070897	0.00626982	0.00919931
2.375	33.5	4.625	0.0073176	-0.00716596	0.0245987	2.6	34.4	2.6	0.0135377	0.0139087	0.00354421	2	40	3	0.00574723	0.00853775	0.00463078
3.125	33.5	4	0.0151496	-0.00585896	0.0228471	1.9	34.5	3.3	0.00861745	0.0170569	0.00804039	2.1	39.7	3	0.00596359	0.00808912	0.00866641
2.75	33.5	5.125	0.0130038	-0.00797436	0.0293523	1.3	34.2	2.4	0.0048209	0.010747	0.00586925	3.3	40.1	3.1	0.0102592	0.00787297	0.0133233
1	32.5	4.125	0.0010148	-0.0167879	0.0226414	2.7	34.7	2.8	0.0171994	0.0148543	0.00611099	3.4	40.6	4.3	0.0105248	0.00949189	0.0114083
1.625	34	4	0.00691547	-0.00526436	0.0226914	1.4	34.2	3.4	0.00726339	0.0111899	0.0069885	2.4	40.9	2.4	0.00516711	0.0105322	0.0128748
2.5	33.875	3.75	0.0110569	-0.0048644	0.0227334	2.2	34.9	3.7	0.00969109	0.0181881	0.0127571	2.9	39.7	4.2	0.0106946	0.00767987	0.013916
2	33.5	4.25	0.00840371	-0.00710174	0.0240542	1.9	34.3	5.4	0.00881251	0.0134045	0.0178102	2.3	41.8	4.1	0.00666462	0.0115458	0.0145838
2.875	33.125	2.875	0.0124195	-0.0106363	0.0180759	1.6	34.7	3.6	0.00632425	0.0168142	0.00969299	2.5	41.3	3.8	0.00732897	0.0114149	0.0100649
1.5	33.25	4.5	0.00572765	-0.0112246	0.0272043	1.6	34.9	4.7	0.00822789	0.0183704	0.0168299	3.3	41	3.6	0.0111165	0.0100613	0.0162021
3.25	33.25	5.75	0.0138747	-0.00828214	0.0291371	3.2	34.4	3.5	0.0156842	0.0118113	0.00891939	3.4	42.1	2.7	0.00924143	0.013353	0.00673764
2.25	33.625	4	0.0077652	-0.00669725	0.0213536	1	35.2	3.4	0.00150631	0.0196779	0.00948287	2.4	42.4	2.9	0.00706679	0.0123606	0.00821348
2	34	3.375	0.00558329	-0.00388542	0.0209894	1.8	34.6	3.8	0.0113018	0.0148263	0.0109627	2.1	42.1	2.5	0.00465739	0.0134999	0.00936683
2.625	33.5	6.125	0.0117386	-0.00811414	0.0313705	1.5	34	3.2	0.00622607	0.0110623	0.00721204	3.4	42.3	4.2	0.0109855	0.0121809	0.0184376
2.375	33.875	4.75	0.0112468	-0.00517801	0.0241595	1.9	34.9	4.9	0.00964491	0.0194985	0.0169838	2.9	43.3	4.3	0.0112125	0.0142576	0.0161973
2.875	34	5.375	0.0126552	-0.00336661	0.0271903	2.4	35	4.9	0.0163063	0.0188694	0.01806	2.8	43	4.1	0.00877712	0.0150555	0.0212815
3	33.75	4.125	0.0116281	-0.00404247	0.0215103	1.4	34.9	4.1	0.00860758	0.0186785	0.00961887	4.3	43	4.6	0.0147983	0.0144924	0.0207595
2.75	34.125	4.625	0.0153781	-0.0014769	0.0261489	2.2	35.2	3.8	0.0124732	0.0194319	0.010314	3.8	43.3	2.2	0.0107873	0.0146122	0.000817449
3.5	33.625	4.875	0.0153163	-0.00645877	0.0248034	1.9	34.5	4.8	0.00952917	0.0142049	0.0144089	3.6	44.1	3.3	0.0119313	0.0176796	0.00771434
2	33.875	5.25	0.00604899	-0.00625214	0.0262856	2.8	35.3	4.5	0.0150231	0.0215579	0.0140441	3.5	44.2	4.4	0.00979895	0.0158812	0.0228584
3.125	33.875	3.875	0.012563	-0.00500979	0.0233586	2.8	35.5	3.2	0.0139225	0.0213107	0.00837065	3.7	45.6	4.3	0.0138073	0.0192337	0.014232
3.25	34.125	5.125	0.0156787	-0.00179844	0.0277427	3.6	35.4	4.7	0.0200491	0.0214275	0.0143319	3.2	45.6	4.3	0.00929676	0.020475	0.0224857
3.125	34.25	5.375	0.0149891	-0.000619924	0.029086	2.2	35.7	4.4	0.00830689	0.0255682	0.0129269	4.8	45	5.5	0.0154314	0.0179507	0.0213593
3.875	34.375	4.875	0.0164217	0.000151651	0.0253228	3.4	35.2	4.8	0.0215337	0.0205191	0.0126109	4.1	46.4	3.7	0.0146364	0.0210253	0.0221588
3.75	34.875	5.25	0.0222601	0.00374264	0.0274963	3.7	35	4.4	0.021606	0.0178041	0.0121295	6.1	46.1	6.1	0.0179838	0.0200293	0.0256377
2	35	8.625	0.00909217	0.00481401	0.0405118	3.5	36.1	5.5	0.0225873	0.0253077	0.0215639	5.8	47.3	5.7	0.0220957	0.0221826	0.0331834
4.75	34.875	3.875	0.0216884	0.00441167	0.0226017	2.6	35.8	5.8	0.0175925	0.028915	0.0246759	4.3	48.1	5.2	0.0154499	0.0248105	0.0266074
4.125	34.625	7.375	0.0195898	0.00167327	0.034382	4.4	36.1	6.2	0.0234255	0.0288819	0.0259366	5.9	48.2	3.6	0.0202659	0.0246556	0.0162044
3.875	35.625	8.875	0.0180907	0.00966581	0.0445335	2.5	35.8	5.2	0.0175218	0.0229863	0.0158932	5.8	50.1	5.7	0.0176962	0.0284285	0.0320067
2.875	35.25	6.875	0.010954	0.00697489	0.033878	4.9	35.8	5.4	0.0307701	0.0247019	0.0197467	5.2	51.3	4.9	0.0166738	0.0300845	0.021599
3.625	34.875	6.125	0.0162902	0.00439133	0.0287929	3.8	37	5.6	0.0246833	0.0338965	0.0227721	8.2	52.5	4.1	0.0300423	0.0329854	0.0219975
4.5	36.125	9.625	0.0187856	0.0134157	0.0453571	3.9	36.8	7.9	0.0280435	0.0341592	0.0323287	8.9	51.8	5.1	0.0288363	0.0304695	0.0279187
4.5	35.5	6.125	0.0229664	0.00850846	0.0304221	6.1	36.4	6.7	0.0434666	0.0333081	0.0262465	7.3	54	5.5	0.026641	0.0358565	0.023786
4	35.875	6.625	0.0195692	0.0125253	0.0352915	5.1	37.1	6.8	0.0386903	0.0341184	0.0252355	8.3	55.4	6.3	0.0296995	0.039389	0.0363482
6.5	37.375	7.875	0.0372116	0.0241013	0.0392673	5.1	37.3	7.1	0.0362623	0.0354267	0.0250806	10.5	57.8	4.2	0.0378257	0.0419339	0.0190102
5.75	37.125	7.5	0.0274644	0.0211868	0.0360137	5.2	37	6.7	0.0327303	0.0340113	0.0289263	10.9	59.2	6.2	0.0374692	0.0469579	0.0296109
5.125	37.75	8.75	0.0255211	0.0228133	0.0420104	4.7	37.4	8.5	0.0299938	0.0374986	0.0353375	8.6	61.9	4.6	0.0314951	0.0488893	0.0176648
5.125	36.625	6	0.0273839	0.0165064	0.0338735	5.3	38.5	8.3	0.0321979	0.0495648	0.0359236	9.7	64.9	5.9	0.0369685	0.0571345	0.0391608
5.125	36.5	9.5	0.0246476	0.0166549	0.0439125	4.8	39	8.7	0.0289167	0.0520516	0.0394856	14.2	67.3	6.6	0.0522616	0.0604238	0.0378402
6.625	36.625	9.25	0.0364984	0.0218122	0.0430661	6.5	38.9	11.8	0.0402146	0.0495142	0.0496494	13.1	69.3	8.1	0.0493768	0.0662715	0.0495989
7.375	38.5	10.5	0.0386165	0.0309593	0.0501849	6.8	39.9	11	0.0465714	0.0589132	0.0468627	12.6	73.1	7.4	0.0515443	0.0725166	0.0428066
6.75	39.875	12.25	0.0393309	0.040882	0.0534101	6.5	40.4	8.7	0.0422991	0.0628761	0.0331498	14.6	77.8	8.8	0.0498858	0.0787969	0.0355305
8.375	38.625	12.875	0.0443057	0.0371591	0.0570933	7.4	41.5	9.8	0.0388139	0.0717951	0.0407145	17.4	82.7	9.9	0.0629008	0.0914357	0.0719429
9.125	40.25	11.375	0.0499493	0.046083	0.0524361	9.2	41.6	10.9	0.0661692	0.0678903	0.045757	19.3	89.5	9.1	0.0695699	0.104482	0.0509313
7.75	40.375	12.375	0.0458067	0.0499444	0.0594306	9.6	42.7	12.5	0.0687626	0.0848389	0.0536697	23.1	97.4	9.5	0.0811801	0.120007	0.0623479
10	40	15.125	0.0535173	0.0475951	0.0688047	8.9	44.3	15	0.056449	0.0916473	0.0645083	23.7	107.2	8.2	0.0881484	0.137774	0.0532721
10.25	42.375	15.625	0.0586699	0.0625556	0.0701672	13.1	46.1	17.2	0.0929786	0.117514	0.0755337	26.2	118	10.7	0.0931843	0.159314	0.0646335
10	44.875	16.375	0.0606946	0.076402	0.0749107	12.5	47.9	15.7	0.079423	0.123048	0.0666632	32.6	132.2	12.2	0.121593	0.186737	0.0683428
14.125	46.25	19.875	0.0796391	0.09207	0.0886712	15.1	50.6	17.7	0.0987431	0.149249	0.0761023	39.6	147.9	16.2	0.152937	0.213764	0.120999
14.75	47.5	22.375	0.0811519	0.103739	0.096417	17	53.5	20.4	0.118705	0.172588	0.0975721	51.1	172.2	17.7	0.187221	0.261916	0.12001
15.5	49.75	25.25	0.0872519	0.118266	0.107819	20.3	58	27.7	0.13445	0.209543	0.121379	56.6	199.3	18.6	0.211219	0.315664	0.13175
18.25	54.875	30.875	0.110606	0.16089	0.128944	23.4	61.3	27.3	0.151671	0.227506	0.128118	67.3	232.7	22.7	0.251819	0.379332	0.157662
23.125	59.875	37.75	0.138585	0.198412	0.157416	30.5	69.8	40.1	0.210379	0.297897	0.185174	91.4	270.3	29.2	0.335325	0.447012	0.194639
24	66.375	42.625	0.145911	0.23762	0.178578	32	77.5	47.3	0.201626	0.366657	0.233708	104.2	327	34.9	0.375604	0.55767	0.261867
32.75	75.75	53.5	0.198233	0.318568	0.222541	43.7	91.3	63.8	0.302682	0.478251	0.297056	143.8	383	43.4	0.543402	0.661662	0.326767
38.25	91.875	72.375	0.225789	0.435223	0.291775	57.7	100.7	76.5	0.394112	0.542124	0.371391	162.9	425.1	58.1	0.597929	0.748601	0.435481
54.125	108.125	103.375	0.322062	0.555884	0.414599	77.9	119.8	109.7	0.544786	0.710213	0.546099	203.6	468.2	70	0.751455	0.825312	0.512156
72.875	127.875	142.375	0.439724	0.701989	0.575254	91.9	133.6	145.8	0.636615	0.797999	0.722291	237.3	489	84.1	0.878917	0.873216	0.634825
92.125	138	175.5	0.54443	0.797924	0.684393	111.9	143.9	179.5	0.780223	0.890233	0.85144	238	521.3	92.5	0.913761	0.939553	0.712062
106.25	143.375	191.5	0.643525	0.855546	0.764403	121.3	150.7	184	0.82392	0.927973	0.864943	236.5	523.2	105.9	0.890231	0.948259	0.777053
123	154.875	229.375	0.753714	0.96635	0.897457	134.3	160.4	189.9	0.902673	1	0.916282	243.2	546	102.1	0.919519	0.994462	0.791077
130.125	144.75	200.75	0.805527	0.905848	0.82264	137.8	148.1	188.8	0.928552	0.893607	0.915366	235	526	111.4	0.906738	0.971399	0.867803
125.125	133.375	205.625	0.791657	0.820795	0.824772	129.4	139.6	173.6	0.870256	0.837153	0.845973	220	504.3	114.1	0.844583	0.924525	0.866161
126.375	129.875	183	0.787077	0.805043	0.764979	125	129.1	168.7	0.833765	0.761676	0.826355	207.3	470.4	107.9	0.813607	0.864852	0.85723
119.25	118.75	196	0.740899	0.724845	0.791983	122.3	119.1	159.2	0.827397	0.694567	0.78345	193.4	424.5	111	0.755162	0.780583	0.861825
122.375	115	191.75	0.755316	0.690898	0.780197	115	109	163.5	0.813179	0.600399	0.793782	162.9	389.2	111.4	0.669258	0.716019	0.837543
121.875	112	202.5	0.756752	0.675332	0.819907	109.2	105.9	163.9	0.752077	0.581543	0.817432	156.9	352.1	100	0.610656	0.641368	0.796556
123.5	103.875	177.875	0.780485	0.614501	0.728162	102.4	99.3	154.3	0.687885	0.541037	0.758662	135.8	316.5	106.4	0.559084	0.579664	0.854572
115.5	98.625	174.75	0.724015	0.573817	0.708963	99.9	95.3	142	0.695851	0.492577	0.694825	121.2	290.1	102.4	0.495481	0.523496	0.818013
103.5	95.125	180.625	0.658978	0.531994	0.73128	101.1	92.8	140.4	0.700195	0.477795	0.681626	120.1	259.9	98.1	0.473035	0.465413	0.743447
109.375	94	181.25	0.686748	0.528127	0.728139	93	89.9	135	0.636715	0.463732	0.681344	106.9	231.3	101.2	0.430063	0.404285	0.810283
108	91.375	179	0.675539	0.499361	0.724358	100.4	86.2	141.6	0.684658	0.435948	0.703318	96.3	218.2	99.1	0.389994	0.379853	0.766708
115.125	92.5	173.75	0.711732	0.512754	0.701357	89.4	85	139.2	0.609037	0.430893	0.68234	86.8	202.1	99.3	0.355428	0.34315	0.788918
110.375	91.125	182.75	0.684245	0.506246	0.756306	88.9	84.2	139.3	0.650677	0.411096	0.661406	77.9	186.1	103.4	0.322953	0.312021	0.796697
106.875	90.875	168.25	0.672508	0.495268	0.679688	93.8	83.2	144.3	0.670624	0.407436	0.726304	77.3	171.3	95.8	0.312755	0.283206	0.771585
109.25	88.25	177.75	0.678965	0.471084	0.711338	94.6	81.2	142.2	0.647789	0.405922	0.708194	75	157.6	91.9	0.291658	0.257349	0.710299
106.25	87	164.875	0.670447	0.467944	0.683633	84.7	79.7	141.8	0.577653	0.389778	0.697529	64.4	145.3	97.6	0.257117	0.220341	0.768373
104.625	86.5	167.875	0.650209	0.467022	0.679326	92.6	82	134.5	0.646066	0.412666	0.648956	63.1	137.7	96.1	0.251252	0.208944	0.747296
104.375	86.625	166.625	0.660278	0.466552	0.684978	86.9	78.3	135.9	0.609616	0.382452	0.663946	58.5	129.2	91.9	0.237212	0.196718	0.71862
106.375	84.875	163	0.660724	0.450903	0.665317	90	79	127.7	0.641146	0.382593	0.625211	60.8	120.6	104.5	0.235518	0.175342	0.836817
101	82.875	170.875	0.637594	0.434708	0.703307	84.9	79.5	134.5	0.60568	0.384789	0.669665	56.7	115.4	94.3	0.215896	0.164592	0.75851
99.625	84.375	171	0.638306	0.445317	0.69396	88.9	78.1	140.1	0.629581	0.366757	0.700131	51.7	109.9	92.5	0.205913	0.150364	0.702111
99.875	85.375	160.125	0.631005	0.4625	0.645201	84.1	75.4	138.3	0.587805	0.34993	0.677317	52.7	105.8	89.2	0.213693	0.14279	0.704598
103	83.125	171	0.638674	0.442403	0.677797	77.6	78.8	123.8	0.552633	0.385096	0.607939	49.2	101.1	92.6	0.199159	0.129508	0.695564
92.5	82.5	167.75	0.574929	0.421844	0.688102	80.1	77	127.3	0.567965	0.365014	0.638527	47.2	93.9	84.7	0.173898	0.12012	0.71801
96.875	83	168.625	0.625335	0.437128	0.683009	82.9	78.3	127.2	0.590387	0.371155	0.643829	47.1	93.9	83.8	0.191032	0.116684	0.628078
100.25	78.875	166.125	0.626544	0.419324	0.66381	79.2	76.5	120.7	0.554966	0.357167	0.608203	41.2	90	86	0.152674	0.112658	0.665643
96.625	82.875	168	0.604765	0.42665	0.681739	78.6	76.3	121.5	0.562855	0.364049	0.601105	41.5	84.7	91.8	0.165202	0.0987241	0.739224
100.5	78.625	170.875	0.627726	0.403983	0.685467	81	79.9	125.6	0.572788	0.393982	0.620222	43.2	85.8	90.4	0.16664	0.0987558	0.667983
93.25	80.5	154.125	0.586826	0.415457	0.632855	75.5	76.8	128.6	0.549264	0.376835	0.624059	45.2	80.1	86.9	0.173922	0.0910815	0.729809
95.25	79.125	153.75	0.589818	0.408707	0.635567	86	75.4	128.4	0.623749	0.36428	0.644945	42	78.2	86.3	0.164955	0.0856697	0.666776
97.5	78.625	149.375	0.602894	0.403277	0.601356	80.8	77	125.2	0.569877	0.357872	0.614342	42.2	75	87.1	0.169004	0.0819869	0.704639
93.75	79.875	161	0.586975	0.409307	0.639562	83	73.7	121.5	0.594088	0.341502	0.628402	41.1	77.2	89.9	0.162381	0.080202	0.682772
91.125	79.125	145.625	0.561896	0.406628	0.604888	75.4	73.3	120.9	0.535258	0.343062	0.604285	40.8	73.1	87.4	0.153641	0.0755749	0.704907
93.5	79	150.875	0.588488	0.40146	0.609386	78.3	75.3	117.1	0.551704	0.356774	0.573787	41	74.1	81.6	0.165599	0.074648	0.615487
95.875	80.25	163.25	0.58926	0.406827	0.644823	75.5	71.9	113.1	0.538271	0.318733	0.548732	41.9	71.2	87.7	0.160352	0.0698943	0.676227
93	77.75	152.875	0.586208	0.391705	0.617119	82.2	72.4	122.7	0.584427	0.329322	0.599207	38.7	69.2	85.9	0.153459	0.0697908	0.68854
95.625	80.25	145.25	0.599469	0.406449	0.58709	79.2	75.1	120.1	0.563874	0.352185	0.587391	35.9	69.3	89.8	0.135678	0.0658855	0.70841
86.625	77.875	137.875	0.545836	0.39025	0.555955	78	72.7	112.3	0.553428	0.336628	0.557382	37.8	67.3	85.1	0.153173	0.0625893	0.67942
93.875	75.75	157.5	0.583104	0.380305	0.628356	77.5	72.1	126.4	0.542522	0.324673	0.624965	37.4	67.8	85.3	0.138118	0.064449	0.655434
97	77.75	159.125	0.606361	0.39337	0.628782	79.8	74.5	120.4	0.575289	0.353007	0.593548	34.8	64.9	83.4	0.141826	0.0579182	0.679043
90.5	75.75	147	0.570861	0.382217	0.600925	73.5	73.3	118.5	0.536042	0.34465	0.564815	37.5	63.9	84.4	0.138387	0.0564259	0.659142
91	77.375	152.75	0.572179	0.392408	0.620909	76.9	71.9	117.8	0.562954	0.32854	0.590124	33.9	64.7	84.1	0.13502	0.0591783	0.658998
89.75	78.25	147	0.561372	0.395005	0.604128	74.6	73.4	120.9	0.53973	0.338515	0.604354	35.6	63.2	86	0.137582	0.0530373	0.673357
93.875	77.125	158.25	0.589599	0.386681	0.626329	76.9	72.3	121.8	0.546691	0.329864	0.604881	36.1	63.6	84.9	0.142711	0.055203	0.67927
89.875	76.875	147.375	0.555546	0.385803	0.584538	68.5	71.1	116.8	0.503366	0.32613	0.565736	35	64.2	86.2	0.133199	0.0543584	0.676022
88.875	79.75	143	0.552305	0.404815	0.574798	76.4	72.8	116.3	0.524618	0.336391	0.57996	36	61.5	86.8	0.143842	0.0531569	0.691509
89.75	80	143.75	0.569801	0.403594	0.584031	75	71.1	117	0.541273	0.322774	0.583364	35.5	63.6	81	0.131144	0.0550998	0.631756
94.25	74.75	140.125	0.600954	0.376365	0.572964	75.3	72.4	116.5	0.528864	0.330219	0.570898	30.8	61.3	84.6	0.125197	0.0526494	0.656856
81.875	77.375	147.75	0.516282	0.386454	0.595615	69	71.6	109.8	0.493179	0.319633	0.534562	32.6	61	75.5	0.12831	0.0500506	0.625593
88.625	77.125	137.25	0.557232	0.380565	0.567914	77.6	71.3	107.8	0.548142	0.330408	0.525023	34.2	60.5	81	0.125151	0.0488774	0.614128
84.875	78.375	133.75	0.536597	0.381248	0.54423	73.5	71.6	114.4	0.522382	0.328837	0.567533	37.2	58.5	82.1	0.144081	0.045131	0.648375
83.25	75.375	131.25	0.527089	0.366812	0.54025	74.2	72.6	105.6	0.524826	0.335896	0.524466	34.5	59	75.4	0.13851	0.0459023	0.60805
89.25	77.875	144.75	0.563966	0.391182	0.575619	72.3	69.6	106.5	0.530057	0.30499	0.537149	33.2	58.5	79.3	0.128878	0.0459648	0.625069
90.375	74.75	137.125	0.566853	0.36769	0.556812	71.2	71.2	111.7	0.494227	0.325671	0.57185	33.9	58.7	82.3	0.129813	0.0442295	0.64437
82.875	74.875	138	0.517666	0.36518	0.556338	67.4	71.3	108.3	0.482174	0.321146	0.544494	35.4	58	80.7	0.144483	0.0435953	0.640014
89.125	74.875	134.125	0.556383	0.37	0.550288	74.8	71.2	104.3	0.524684	0.31705	0.504377	38.3	58.9	77	0.149418	0.0457452	0.615088
82.375	74.375	137.5	0.513215	0.357645	0.563508	74.6	68.4	114.8	0.520451	0.301714	0.565569	31.8	57.7	80.9	0.122301	0.0433914	0.635334
86.5	74.5	139	0.536912	0.368325	0.574454	67.1	68	108.8	0.47926	0.285221	0.537168	28.7	58.4	71.5	0.11577	0.0456397	0.578778
88.625	76	136.625	0.554277	0.366796	0.558407	75.6	70.5	100	0.533024	0.321857	0.496774	32.9	56.7	79.6	0.119149	0.0404411	0.598378
85.75	73.5	133.875	0.528617	0.357291	0.549556	67.7	69.6	108	0.487834	0.31297	0.536849	32.5	56.4	79.5	0.125405	0.0407296	0.641543
80.75	76.75	127.625	0.502688	0.375049	0.528413	70.1	68.9	111.9	0.496291	0.296364	0.567616	33.7	57.7	79.2	0.132808	0.0432602	0.579805
80.125	74.5	135.125	0.495724	0.357302	0.547771	64.9	69.6	106.4	0.468571	0.30412	0.546771	32.8	55.6	79.5	0.124113	0.0403251	0.621565
86.125	74.5	133.25	0.531464	0.369023	0.538776	69.3	69.6	103.3	0.50077	0.30309	0.503551	33.4	55.6	80.8	0.131249	0.0380822	0.651635
80.375	75.625	134.875	0.505352	0.359594	0.54325	68.4	69.6	103.5	0.485098	0.309648	0.515533	30.2	55.7	80.3	0.117296	0.0392939	0.629334
87.75	73.625	140.5	0.537808	0.355901	0.567619	71.2	70.5	106.7	0.504353	0.31585	0.536772	35.3	55.9	81.7	0.137272	0.039348	0.637492
84.125	76.5	127	0.528767	0.374535	0.527834	63.7	67.5	107.8	0.436717	0.284582	0.538413	33	55.4	76.1	0.123103	0.0398743	0.589799
80.625	73.875	140.75	0.505477	0.358419	0.566098	70.5	68.3	98.8	0.510791	0.301888	0.491471	32.4	55.7	78.3	0.134146	0.0411931	0.629552
81.5	74.25	137.25	0.510322	0.353824	0.562728	64.4	70	105.2	0.472201	0.314292	0.51549	34.3	56.9	74	0.125428	0.0417969	0.57774
80.125	73.75	125.625	0.51041	0.346039	0.506297	66.9	69	103.5	0.476886	0.299056	0.497633	31.5	55.6	77.9	0.120347	0.0389384	0.60611
80.875	74.25	141.375	0.512385	0.35796	0.558261	69.7	70.9	105.8	0.503753	0.315959	0.513801	35.1	54.4	74.6	0.136299	0.0371758	0.593907
80.25	71.125	136.375	0.527016	0.334988	0.546646	66.4	66.5	97.1	0.472555	0.277165	0.474914	34	55.3	75	0.133663	0.0382618	0.573625
79.875	75.625	124	0.49503	0.362705	0.507428	65.4	67.1	103.8	0.466333	0.282607	0.500254	32.8	54.7	75.4	0.125604	0.0360545	0.593343
85.625	71.5	136	0.525035	0.337515	0.551242	65.2	68.5	102.2	0.470239	0.297141	0.514281	33.4	54.3	79.5	0.132447	0.037748	0.630476
81.875	74.375	131.625	0.51664	0.356213	0.538492	70.2	68.6	103	0.505435	0.295849	0.502796	29.3	53.8	82.9	0.113037	0.0358233	0.642791
79	72.75	134.5	0.496797	0.347607	0.537136	68.7	70.1	101.5	0.494636	0.313877	0.51215	32	54	75	0.120808	0.0352944	0.562001
79	74.625	134.375	0.504082	0.364826	0.555361	64	68	99	0.454177	0.291179	0.498491	32.9	53.4	76.1	0.125715	0.0332803	0.580379
75.125	75.125	129.875	0.480857	0.356192	0.530972	66.8	68.3	102.2	0.478539	0.296615	0.497952	29.9	55	72.9	0.122528	0.0366021	0.58038
78.25	70.875	142.625	0.499187	0.332346	0.574897	66.7	70.3	98.4	0.49052	0.30488	0.494122	34.4	53.7	74	0.125125	0.0360473	0.578054
79.125	71.75	131.5	0.48212	0.336845	0.53161	66.7	67.4	94.7	0.475302	0.290764	0.477618	32.7	54.6	72	0.121636	0.0375538	0.575279
77	73.875	121.875	0.48766	0.350954	0.501515	63.1	69.5	95.2	0.456715	0.296064	0.469396	33.1	53	70.7	0.125277	0.034419	0.58014
77	73.75	124.375	0.493619	0.350529	0.505617	61.5	67.4	94.5	0.444959	0.290099	0.472383	29.8	52.7	76.1	0.112264	0.0338457	0.556573
79.25	71.875	128.75	0.493597	0.337136	0.515131	62	67	100	0.422316	0.281363	0.49501	28.5	54.3	74	0.117559	0.0344715	0.570547
82.5	74.25	118.125	0.511704	0.364004	0.495078	66.6	66.6	104.8	0.472361	0.285765	0.511282	30	53.6	70	0.113312	0.0353683	0.562983
76.75	72.625	128.875	0.485637	0.346824	0.525601	66.7	69	101.3	0.465994	0.310624	0.48394	29.3	52.5	67.6	0.115585	0.0337339	0.511173
78.125	72.25	124.5	0.493914	0.339959	0.513582	65	67.6	109.2	0.444243	0.289557	0.539906	30.7	52.8	72.7	0.112967	0.0343109	0.574135
76.25	73.875	122.5	0.494826	0.349458	0.486874	63.5	66.7	102.2	0.450161	0.275969	0.490488	28.2	53.1	74.1	0.109676	0.0330703	0.572336
73.75	72.625	128.375	0.45796	0.344557	0.517489	64.5	66.5	100.5	0.446973	0.290305	0.486967	29.5	52.8	70.7	0.114629	0.0330417	0.552723
76.125	70.25	121.875	0.478255	0.325574	0.495275	57.6	67.1	98.4	0.401557	0.286319	0.478279	28.3	52.7	63.9	0.114167	0.0337589	0.513957
76	71.125	125.25	0.462329	0.331166	0.506019	66.5	67.9	99	0.483465	0.285709	0.484134	28.9	52	70.6	0.113286	0.0308049	0.526462
76.375	71.75	121.25	0.472706	0.333267	0.494671	63.2	66.7	95.2	0.446251	0.286817	0.456241	29.5	52.8	71.2	0.105887	0.0340312	0.559743
81	70.625	122.875	0.509951	0.335042	0.506172	62.4	67.3	98.3	0.455466	0.286536	0.485624	32.5	52.9	68.5	0.121441	0.0327488	0.54733
77.125	73.625	128.75	0.483977	0.347407	0.512935	59.7	66	94	0.40709	0.269682	0.471535	30.8	52.8	77.3	0.116956	0.0339676	0.577046
75.875	72	127.625	0.479211	0.337321	0.516405	65	68	99.1	0.458739	0.293081	0.494585	28.4	52.6	70.8	0.109807	0.0329799	0.565791
78.625	72.625	124.375	0.506841	0.341545	0.498167	68.3	67.1	100.4	0.472145	0.290969	0.506792	30.3	53.1	67.2	0.122951	0.0314959	0.522219
74	73.125	127	0.478113	0.338378	0.510303	56.9	68	103.1	0.420864	0.293902	0.515553	30.5	52.5	64.9	0.113816	0.0343122	0.502572
74.375	71.375	113.75	0.471708	0.333603	0.470556	59.5	65.4	94.1	0.426334	0.278336	0.462404	31.6	51.8	65.4	0.114349	0.0316175	0.525243
78.625	71	121.125	0.48838	0.329311	0.495376	63.3	65	91.5	0.436457	0.276526	0.457596	26.7	52.1	71.3	0.104775	0.0314957	0.55251
82.625	71.75	111.625	0.510628	0.335661	0.454258	62.6	65.3	92.5	0.461047	0.270479	0.454986	26.8	51.6	67.6	0.101331	0.0305826	0.513055
74.375	69.25	111.5	0.471727	0.316909	0.463741	59	67.1	97.9	0.440909	0.281733	0.469569	27.8	53.1	69.9	0.101806	0.0337421	0.526786
73.5	70.75	112.625	0.475828	0.327166	0.473707	61.5	68.3	91.8	0.450368	0.294126	0.457009	28.8	51.5	65	0.117512	0.0307105	0.510264
72	68.625	114.25	0.464478	0.312183	0.468193	57.4	67.3	95.6	0.397834	0.290214	0.466131	30.5	52.4	72.5	0.117497	0.0320875	0.56346
73.75	70.375	115.375	0.453927	0.328974	0.476669	64.6	66.3	99.5	0.448717	0.276643	0.500254	28.6	51.6	68.9	0.118188	0.0322772	0.549279
75.875	70.375	118	0.47028	0.319787	0.479351	59	65.6	97.5	0.42868	0.273408	0.478944	30	54.4	70.1	0.114355	0.0352333	0.535545
79	69.625	119.25	0.485195	0.324794	0.488323	63.1	65	98.9	0.441971	0.270433	0.490946	30.6	52.7	68.3	0.117124	0.0344124	0.556246
68.375	69.875	120.75	0.423335	0.319689	0.478815	58.8	65.8	95.2	0.41871	0.276714	0.473902	28.2	52.4	63.9	0.10551	0.0309994	0.501196
76.375	67.375	121.625	0.479601	0.309108	0.507211	58.3	65.8	88	0.411186	0.26892	0.427318	25.1	50.7	71.3	0.0998683	0.0303048	0.559411
67.625	70.25	120.5	0.425889	0.319862	0.485454	66.5	66.5	90.6	0.459805	0.273398	0.452437	29	51.8	65.8	0.119137	0.032612	0.504924
72.75	67.625	117.625	0.448223	0.300228	0.478747	65.8	65.7	98.4	0.490526	0.276525	0.492819	25.3	50.4	71.4	0.0923318	0.0279528	0.54571
70.375	69.625	119.25	0.446548	0.316561	0.482767	60.2	66	93.6	0.428596	0.279248	0.457635	27.3	51.4	61.7	0.101437	0.030034	0.496367
72.375	68.875	115.75	0.46187	0.310322	0.472749	66.4	62.8	91.1	0.46815	0.247169	0.453651	27.8	51.7	69.7	0.106378	0.0308441	0.530163
72.5	70.5	113.5	0.448308	0.323445	0.472382	59.9	62.7	91.5	0.431591	0.253334	0.451356	25.2	50.5	65.7	0.103326	0.0298931	0.526353
66	71.25	116.25	0.410358	0.325227	0.469766	63.7	64.4	94.9	0.453122	0.259077	0.479907	27.1	50.7	66.4	0.104833	0.0294355	0.506091
71	69.75	108.125	0.452861	0.316765	0.446664	58.9	64.3	91.4	0.390938	0.260044	0.439279	28.7	51.6	69.8	0.111461	0.0310347	0.49572
68.375	69.75	114.875	0.430346	0.311015	0.472509	59.3	65.3	100.3	0.427637	0.272768	0.494848	28.9	50.8	69.8	0.112003	0.0308857	0.559809
72	70.5	114.5	0.453458	0.318726	0.476807	63	63	82.8	0.44801	0.263333	0.4099	28	49.9	64.9	0.109634	0.0274295	0.523138
72.5	71.375	114.125	0.451609	0.329763	0.460406	62.2	64	95.8	0.443638	0.251242	0.480273	29.2	51.3	71.8	0.116271	0.0301545	0.562659
73	68.75	117.875	0.456432	0.312662	0.481166	56.2	66	89.8	0.385431	0.282607	0.440375	27.8	50.9	69.2	0.103103	0.0297216	0.526398
67	71.25	112.5	0.414423	0.32091	0.46595	60.2	63.2	90.1	0.42194	0.252305	0.441677	30.3	51	66.6	0.117027	0.0305904	0.535635
68.75	69.75	113.125	0.440027	0.310694	0.46224	60.8	64.9	82.4	0.438236	0.270903	0.409664	30.8	51.3	63.1	0.121425	0.0307693	0.47756
72.375	69.625	108.875	0.445456	0.313637	0.448603	61.2	66.1	86.6	0.429352	0.279571	0.405573	23.2	50	65	0.0923261	0.0272831	0.505423
70.25	68.5	109.75	0.443031	0.307632	0.446201	57.9	63.9	95.4	0.398176	0.263469	0.463135	30.5	50.3	65.4	0.11152	0.0293524	0.523319
73.875	68.75	115.875	0.455919	0.312951	0.457299	58.6	65.5	93.2	0.422168	0.266044	0.454034	26.9	50.2	62.6	0.109881	0.0276156	0.478617
73.875	70.375	109.25	0.469882	0.325826	0.451788	57	63.7	93.6	0.405469	0.266751	0.450908	25.2	51.6	62.7	0.0989419	0.0307462	0.475633
67.125	71.125	107.5	0.421558	0.325512	0.437179	54.1	65.2	93.7	0.372398	0.269119	0.461247	28.7	49.6	61.4	0.110082	0.0293326	0.483889
67.625	69.125	112.5	0.434679	0.30256	0.471757	56.8	64.5	79	0.403363	0.264104	0.385959	29.5	51.5	63.4	0.110641	0.0302231	0.517431
71	71.375	120.875	0.437087	0.329907	0.486664	55.4	64.4	88.5	0.405557	0.269837	0.434842	26.5	51.4	66	0.104356	0.0297947	0.52321
68	70.5	114.125	0.420586	0.320603	0.468924	58.6	65.1	84.7	0.417708	0.26832	0.406038	27.1	49.9	63.3	0.100423	0.0302802	0.478482
66.5	66.75	106.5	0.428919	0.28962	0.43022	63.9	64.9	92.4	0.470407	0.263963	0.454421	24.8	50.7	61.1	0.0974202	0.0295865	0.49638
67.5	71.375	117.125	0.421422	0.327544	0.47467	63.1	64.5	86.5	0.433124	0.263392	0.419696	24.7	50	64.5	0.0954869	0.0279834	0.533095
72.875	66.125	119.75	0.452028	0.286951	0.484529	54.4	64.5	87.8	0.37783	0.264378	0.434013	26.3	49.6	60.1	0.102038	0.0266116	0.447693
69.375	68.75	102.25	0.427317	0.305585	0.427507	65.7	65.3	86.4	0.471383	0.26741	0.424569	27.6	50.9	65	0.104526	0.0307461	0.502132
69.5	67.375	108.875	0.42808	0.29822	0.444648	54.5	64.8	86.1	0.393559	0.269032	0.426455	28.3	50.4	61.6	0.10545	0.0288021	0.497642
65.375	67.375	106.75	0.414311	0.289135	0.439322	60.3	63.8	89.9	0.4224	0.260113	0.440844	27.2	50.2	67.2	0.105619	0.0287492	0.500888
63.375	67	109.375	0.409963	0.297005	0.436647	54.5	62.9	87.8	0.37624	0.257665	0.436499	26.8	50.1	75.5	0.100651	0.0285975	0.596722
73.75	65.125	110.875	0.456301	0.279719	0.447689	61.2	63.3	93.1	0.443565	0.256132	0.453915	27.3	50.3	64.1	0.107678	0.0292096	0.530645
65.875	68.125	109.875	0.418443	0.304722	0.446906	56.6	62.5	85.3	0.41383	0.24805	0.413151	26.3	50.8	62.7	0.0984572	0.0293206	0.483459
69.75	70.125	102.75	0.43327	0.320166	0.41383	56.2	64.9	82.9	0.409645	0.273771	0.40003	27	51.4	66	0.101412	0.0307695	0.496353
61.375	67.75	110.25	0.403558	0.296234	0.454978	56.2	61.6	91	0.396187	0.23266	0.45721	26.7	50.1	68.3	0.0986554	0.0287046	0.534824
65.375	67.125	105.875	0.408326	0.290176	0.424572	58.9	61.1	98.6	0.415234	0.232573	0.469374	26.7	50	58.6	0.108376	0.0282809	0.461349
69.875	67.625	112.25	0.437943	0.298706	0.450939	58.1	61.3	84.8	0.414596	0.235598	0.418479	24.8	49.1	64.6	0.0949162	0.0259738	0.529037
68.125	67.375	112.75	0.41766	0.300276	0.452224	55.6	63.7	81.1	0.388477	0.261688	0.39017	26.6	50.5	65.1	0.104948	0.0290517	0.513316
60.375	67.5	108.625	0.382801	0.289867	0.44434	59.5	63.3	85.6	0.40756	0.256044	0.404876	22.3	50.5	65.5	0.088654	0.0290363	0.501259
64.625	71.125	108	0.394987	0.314533	0.439256	54.8	63.6	87.8	0.381848	0.253014	0.427181	28.4	51.8	58.8	0.111246	0.0319504	0.475795
70.75	67.625	100.5	0.445593	0.298169	0.412204	56.4	63.2	85.9	0.404787	0.249269	0.42397	22.1	49.1	60.6	0.0900902	0.0279943	0.472554
66.875	67.875	100.5	0.41437	0.295209	0.425732	52.6	64	81.2	0.377714	0.256618	0.399354	25.5	49.6	57.8	0.0924354	0.0269047	0.466227
70	69.75	104.5	0.428135	0.309879	0.427354	54.1	64.4	85.9	0.381545	0.265491	0.423149	24	50.4	70.5	0.0980426	0.0298453	0.546225
66.375	67.625	108.125	0.408743	0.291603	0.434282	52.7	62.8	80.3	0.378598	0.248475	0.397663	25.2	50.8	62.2	0.0914168	0.02815	0.496554
66	68.75	99.875	0.414278	0.301178	0.416468	56.7	62.8	85.3	0.406232	0.251878	0.430839	28.9	47.7	58.9	0.112654	0.0237045	0.46447
69.75	67.5	97.875	0.427763	0.296021	0.413008	55.8	63.7	82.1	0.414348	0.255734	0.384989	26.9	49.8	60	0.0993396	0.028412	0.449675
63.5	67.25	103.25	0.400786	0.295253	0.42522	55.8	63.1	84.2	0.410014	0.250539	0.422251	29.8	49	55.4	0.118151	0.0248288	0.427862
69.625	67.125	93.375	0.424378	0.293785	0.383391	55.1	64	88.3	0.384177	0.25848	0.432674	26.2	50.9	61	0.101966	0.0289949	0.493625
66.5	67.875	107	0.424148	0.292851	0.436603	53.8	64.7	82.2	0.378355	0.269166	0.400652	24.3	50.4	58	0.100461	0.0292178	0.423081
63.375	65.25	102.25	0.404536	0.274758	0.424895	57.1	63.7	81.1	0.390663	0.259781	0.386598	24.4	50.4	62.5	0.0903357	0.029767	0.462226
64.75	66.625	98.375	0.405499	0.280881	0.408943	57.8	64.1	84.5	0.397161	0.257371	0.421802	27.8	50.1	67.4	0.110856	0.0271696	0.530541
66.875	65	100.125	0.406897	0.278182	0.395761	55.9	62.5	86.6	0.401784	0.244736	0.432476	22.3	49.8	61.3	0.0842588	0.0286392	0.458781
64.625	67	95.75	0.408983	0.290063	0.402659	53	62.2	81.6	0.389099	0.248613	0.387996	24.2	49.2	61.3	0.0897044	0.0269863	0.490267
68.875	64.375	101.5	0.428847	0.274059	0.419989	56.4	63.2	89	0.406743	0.255695	0.433674	26.2	48.1	62.2	0.103212	0.0245172	0.490513
61.5	66.75	110.125	0.38157	0.284926	0.44982	50	62.8	83.5	0.369957	0.246775	0.402169	25.7	48.9	59	0.0931472	0.0260663	0.451856
64.75	65.625	100.625	0.404761	0.280576	0.418462	56.8	64.6	87.4	0.386974	0.262076	0.437761	27.1	48.5	63.6	0.100569	0.0246521	0.500115
65.25	66.25	95.75	0.405895	0.284738	0.403178	54.5	62.4	85.7	0.386688	0.252091	0.411976	25.6	50.2	63.2	0.0993445	0.0265093	0.508493
60.625	65.375	105.125	0.377031	0.27628	0.419961	52.9	62	86	0.377174	0.236801	0.420855	28.1	48.1	58.9	0.104479	0.0247604	0.465151
62	68.625	101.125	0.389588	0.303169	0.415132	59.6	62.4	83.2	0.410161	0.250126	0.406765	23.7	50.2	56.1	0.0950491	0.028103	0.419297
63.125	66.25	108.625	0.392363	0.286289	0.452378	56.2	62.2	75	0.400757	0.243867	0.373552	25.2	49.3	57.8	0.0966696	0.0283426	0.430215
68.125	66.5	98.75	0.416886	0.291831	0.409355	56	63	79.7	0.418778	0.248542	0.400431	25.3	49.5	56.6	0.100083	0.0268489	0.463627
61.75	66.375	110.125	0.384133	0.278344	0.441352	54.6	62.8	79.8	0.39062	0.24883	0.384766	22.2	49.7	58.6	0.0875389	0.0273776	0.455306
62.75	64.25	101	0.384814	0.267756	0.42039	56.4	61.1	83.3	0.388294	0.2383	0.40475	23.4	49.1	62.7	0.0839659	0.0256862	0.494105
64.25	66.125	98.375	0.408619	0.28649	0.403972	53.4	60.1	81.8	0.383349	0.223288	0.391562	23.3	49.5	63.2	0.0963519	0.0279731	0.483079
63.75	65.875	100.625	0.403152	0.279681	0.415081	57.7	63.3	78.4	0.411838	0.25544	0.381226	25.7	48.2	63.8	0.0971445	0.0235837	0.504116
60.25	65.5	104.625	0.385924	0.279851	0.429628	53	61.5	83.6	0.383367	0.234175	0.417047	22.6	49.4	60.3	0.0879988	0.0254577	0.462068
63.375	66.5	102	0.39646	0.281732	0.41584	52.1	62.1	85.1	0.355234	0.246191	0.414388	24.5	49.1	58.8	0.0912607	0.0261657	0.453085
62.25	65.875	100.25	0.389801	0.281891	0.408656	52.9	64.2	73.3	0.381199	0.267689	0.360117	25	49.4	57.8	0.0946708	0.0260053	0.44096
60.25	64.625	103.875	0.383978	0.272352	0.433605	50.3	62.8	76.6	0.35826	0.250972	0.37539	24.8	49	58.9	0.100382	0.0260123	0.45772
64.125	64.75	103.125	0.39946	0.273631	0.415222	53.6	61.9	78.2	0.390307	0.238338	0.392379	24.8	48.7	58.5	0.0928602	0.0256407	0.437192
61.875	65.375	100.625	0.406191	0.276955	0.413381	56.4	63.2	79.7	0.399103	0.259329	0.40248	22.9	49.5	56.8	0.0884422	0.025245	0.468695
58.5	65.75	96.375	0.361827	0.274517	0.400273	53.3	61.6	75.6	0.372211	0.24359	0.374723	25.5	49.5	57.1	0.0925535	0.0285683	0.442317
66.75	64	94.5	0.407337	0.271765	0.38608	56.7	63	74.6	0.395261	0.260613	0.358918	26	48.6	59.2	0.0959957	0.0242717	0.451213
64.375	64.75	98.25	0.408736	0.270335	0.405161	48.7	59.5	81.1	0.351701	0.222107	0.406899	24.2	50.1	61.5	0.101875	0.0282557	0.479925
58.125	65.375	101.5	0.370505	0.272673	0.414316	57.5	61.4	80.2	0.423985	0.2327	0.401022	24.2	49.6	58.8	0.0894494	0.027593	0.479665
61.25	65.75	97.5	0.382411	0.28416	0.400347	49.5	61.4	76.4	0.350029	0.237014	0.360368	24.6	49.8	64.1	0.0904434	0.0268311	0.496307
60.875	63.5	101.375	0.379727	0.264202	0.412187	50.9	60.9	77.4	0.372416	0.233641	0.381121	24.3	49.3	60.8	0.0934607	0.0244276	0.478241
58.125	65	91.75	0.357569	0.268126	0.381537	54	61.1	80.8	0.384569	0.23362	0.395475	24.8	48.9	59.3	0.0933397	0.0270373	0.457156
65.625	65.5	99.5	0.405115	0.280869	0.396886	53.6	61.7	75.8	0.382187	0.242339	0.37593	24.7	48	58.5	0.101015	0.02383	0.449283
58.625	64.875	101.25	0.376302	0.272307	0.413724	52.5	60.3	80.4	0.3658	0.235779	0.390402	28.4	47.8	53	0.102955	0.023677	0.432391
57.375	65.375	101.25	0.379787	0.27978	0.414916	48.7	61.4	80.8	0.353024	0.235933	0.395737	25.9	48.4	56	0.106766	0.023546	0.435803
56.5	65.375	101.125	0.359842	0.27109	0.406338	50.6	60.5	76	0.356674	0.230806	0.374841	24	49.3	58.7	0.0949389	0.0269924	0.450101
60	63.625	82.75	0.382711	0.263377	0.34463	51.3	61.6	78.7	0.370184	0.236254	0.382698	23.1	48.6	62.1	0.0862322	0.0255072	0.503716
62.375	63.875	94.25	0.389324	0.269879	0.385609	50.6	61.8	84.1	0.360414	0.23262	0.406763	24.4	48.2	57.6	0.0950792	0.0256996	0.43349
65.375	63.25	98	0.400029	0.26811	0.398052	52.9	63.3	78.1	0.381864	0.254781	0.39165	24.4	48.7	56	0.0934992	0.024053	0.425033
59.5	64.625	97.875	0.380941	0.268316	0.394349	53.7	59.9	79.8	0.394762	0.230941	0.402699	24.5	48.7	51.6	0.0935349	0.0248676	0.402713
66.25	67.125	97.75	0.409228	0.293565	0.397886	54	61.9	71.8	0.378811	0.240867	0.358641	24.4	48.6	57.3	0.0927495	0.0259783	0.451156
57.625	62	97.625	0.362454	0.248286	0.384446	53.1	58.8	81.9	0.382262	0.210245	0.406585	22.7	49	56.8	0.085439	0.027125	0.419846
57	64.625	101	0.35941	0.268748	0.415374	50.9	60.4	79.6	0.364092	0.229474	0.390288	26.1	50	58.1	0.101358	0.0266866	0.442832
64	62.875	91	0.390965	0.265505	0.379754	53.9	62.3	82.2	0.371557	0.247018	0.405146	25.1	47.9	57.1	0.0911626	0.0237115	0.43729
64.5	65	90.375	0.395416	0.274737	0.37395	56.7	60.3	75.6	0.390171	0.228893	0.37927	21	49.2	61.9	0.0859378	0.0267487	0.489425
58.625	65.5	91.125	0.366631	0.279997	0.379189	50.6	63.4	74	0.359619	0.251566	0.364961	24.8	48	53.4	0.0881909	0.0233041	0.376606
58.125	64.875	102.375	0.367534	0.269535	0.424309	57.4	62	77.5	0.409964	0.24261	0.373153	24.3	49.2	58.9	0.0988148	0.0263873	0.460027
54.25	64.25	92	0.359303	0.261918	0.376361	50.6	62.6	74.5	0.355735	0.253847	0.365853	21.5	49.1	55	0.0890857	0.024649	0.439438
64.5	64.25	88	0.394209	0.2718	0.362763	50.8	60	75.3	0.354195	0.223315	0.37691	26.8	48.2	54.3	0.103914	0.0253792	0.404783
61.375	63.625	95.5	0.379024	0.264493	0.395306	52.3	60.4	70.6	0.355234	0.226246	0.353219	23.7	49.2	52.2	0.085194	0.0261241	0.407952
60.25	62.875	97.875	0.374281	0.257781	0.386089	51.2	62.8	72.7	0.376318	0.253044	0.369675	25.4	47.7	52.4	0.0945154	0.0241755	0.394889
60	63.875	97.875	0.380586	0.258797	0.401232	49	61	75.9	0.350943	0.249549	0.377621	24	49.3	57.3	0.0960909	0.0253196	0.448339
64.375	64.5	90	0.411958	0.265141	0.373024	51.5	61.8	73.5	0.37191	0.232941	0.376525	25.8	48.8	56.6	0.0971122	0.0275999	0.442652
59.875	63	97.375	0.370162	0.259213	0.386563	51.8	60.8	82	0.364498	0.230221	0.411766	22	47.9	59.3	0.0858971	0.0244033	0.465764
58.375	63.875	100.75	0.357987	0.264879	0.40833	48.3	60.4	76.9	0.340041	0.224671	0.370186	22.5	48.8	59.1	0.0837452	0.0244926	0.448652
61.75	63	101.375	0.381782	0.259938	0.403899	51.2	60.3	75.3	0.372975	0.230954	0.37738	21.5	47.9	58.5	0.0839682	0.0247985	0.457023
58.625	62.375	94.25	0.366231	0.251926	0.392473	50.9	59.8	75	0.36786	0.223584	0.376418	25.7	49.7	58.3	0.0969937	0.0265344	0.456588
57.5	63.625	96.375	0.362509	0.257653	0.396167	51.1	60.6	81.4	0.360258	0.227361	0.390987	22.5	48.1	54.5	0.0879883	0.0241429	0.421562
63.25	64.75	95.75	0.393325	0.26787	0.38244	50.8	60.3	74.1	0.36135	0.220582	0.361607	22.5	48.3	52.4	0.0868716	0.0239191	0.429537
56.75	62.25	98.125	0.343091	0.252333	0.396231	47.9	60.9	80.6	0.33836	0.235705	0.404549	23.8	48.4	53.3	0.0861174	0.0241259	0.398903
53.125	62.125	90.25	0.331134	0.249573	0.380559	49.4	61.9	74.6	0.352924	0.239367	0.371446	24	48.6	56.3	0.0942239	0.0260363	0.428223
56.875	63.125	97.625	0.357631	0.25841	0.395909	49.8	60.6	73.5	0.353105	0.228318	0.382242	23.1	49.2	52.5	0.0883153	0.0252925	0.412474
62.75	63	92.375	0.386038	0.258879	0.374162	53.1	58.7	73	0.359909	0.20543	0.357196	25.8	50.8	54.2	0.101255	0.029381	0.417476
56.375	61.5	92.875	0.359106	0.242596	0.384551	52.3	59.8	72.2	0.358481	0.217727	0.363316	25.7	49.2	56.1	0.0964472	0.0272397	0.432158
53	63.75	86.25	0.345316	0.258381	0.357291	49.5	61.2	73.5	0.333543	0.237681	0.359708	21.7	49.2	55.4	0.0796896	0.0267913	0.441336
59.75	61.375	88.375	0.374803	0.248255	0.364392	46.3	61.2	73	0.325139	0.233279	0.344271	23.5	47.8	56.7	0.0883413	0.0233593	0.433748
64	64.125	90.125	0.392416	0.267252	0.371729	46.7	60.6	73.7	0.343693	0.236567	0.355806	22.7	47.8	56.8	0.0881963	0.0231814	0.446637
53.25	63.875	87.125	0.339837	0.252038	0.34841	51.6	58.6	74.6	0.382582	0.21089	0.365763	25.3	48.4	59.4	0.0972843	0.0236255	0.467361
56.25	65	93.125	0.355767	0.270001	0.378049	50.5	61.4	78	0.355768	0.237562	0.382362	24.1	48.8	54.6	0.088563	0.0266991	0.429332
60.75	61.875	92.875	0.374222	0.255039	0.372596	49.8	58.9	79.8	0.358581	0.218067	0.391067	23.9	48.6	50	0.0895287	0.0243727	0.387602
51.25	61.25	96.125	0.323478	0.239526	0.391833	52.1	59.6	70.3	0.382787	0.223037	0.340105	25.3	49.1	55.1	0.097844	0.0270168	0.42618
58.375	63.625	94	0.370895	0.258281	0.386104	51.9	59.9	67.4	0.379518	0.23336	0.32953	25.1	48.9	51.2	0.0988132	0.0257807	0.40604
60.25	63.875	88.625	0.372579	0.263328	0.374969	48.9	58.2	74.7	0.352714	0.207394	0.369109	24.2	48.3	54.3	0.0933209	0.0247655	0.412305
57.875	61.875	94.75	0.354191	0.246611	0.380974	47.8	60.5	71.8	0.343777	0.229282	0.343029	25.5	47.7	52.7	0.0958338	0.0231493	0.423304
59	62.5	97.125	0.370719	0.254142	0.392567	49.1	60.8	70.3	0.339713	0.227545	0.350375	24	48.3	54.4	0.0915622	0.0254255	0.419336
56.75	61.75	91.25	0.35663	0.244796	0.376659	49.8	59.7	74.9	0.361443	0.22673	0.386264	20.7	47.7	54.3	0.0783964	0.0246577	0.422194
55.625	63.875	89.125	0.341192	0.262716	0.361179	50.5	57.8	79.5	0.36404	0.210558	0.397111	20.2	48.1	54.1	0.0792219	0.0231043	0.405146
56.5	62.75	79.125	0.354969	0.255922	0.328124	46.6	60.5	74.3	0.348567	0.227111	0.36345	24.7	47.8	54.9	0.0874637	0.0231185	0.431992
54.5	62.125	86.25	0.341631	0.248578	0.361081	50.3	59.2	72.1	0.375136	0.22051	0.347291	20.7	48.2	59.1	0.0789727	0.0235046	0.479929
59.25	61.875	92.75	0.362995	0.252619	0.376474	48.7	58.1	71.9	0.345948	0.208987	0.354816	24.4	47.5	53.8	0.0961716	0.0228477	0.439137
64.5	63.25	92.75	0.397334	0.260935	0.379137	45.8	60.2	78.2	0.329892	0.230113	0.385556	21.3	47.7	54.5	0.0802407	0.0226177	0.41113
52.625	63.875	82.5	0.326327	0.262443	0.341733	52.9	61	73.7	0.373145	0.230967	0.362389	23.2	48.2	56.1	0.085054	0.0237813	0.424333
58.5	62.375	90.875	0.361441	0.253817	0.370869	45.5	60.6	74.7	0.328568	0.236275	0.360195	22.8	48	51.7	0.0858777	0.0244467	0.403069
61.75	62.625	93.75	0.378533	0.256573	0.381531	52.5	59.6	70.6	0.371521	0.226216	0.345957	23.9	48.2	50.7	0.0945181	0.0252693	0.422075
56.5	63.25	88.75	0.344727	0.263643	0.361578	51.4	60.5	73	0.343661	0.231423	0.353357	21.8	47.6	52.5	0.0841896	0.0227588	0.390692
50.625	61	85.25	0.31816	0.241438	0.349791	51.8	59.4	74.2	0.387519	0.220995	0.364742	23.3	47.9	50.2	0.0863193	0.024588	0.413278
53.875	62.5	88.5	0.338735	0.24506	0.358506	50.2	60	72	0.350432	0.227896	0.352156	22.3	46.6	57.9	0.092352	0.021711	0.427539
58.875	63	96.25	0.359346	0.257415	0.376429	47.9	60.9	74.9	0.352382	0.227721	0.354778	25.4	47.7	51.5	0.0912829	0.0225906	0.404183
58	64.25	87.375	0.359667	0.262064	0.359325	47.3	58.8	69	0.332651	0.211442	0.338253	21.6	47.6	48.9	0.0856645	0.0232936	0.392809
58.125	61	90.375	0.366175	0.240486	0.366385	48.3	59.2	72.4	0.362455	0.213332	0.352022	23.4	46.7	51.5	0.0928561	0.022389	0.382041
50.75	63.5	88.625	0.307146	0.25266	0.358505	50.1	58.8	79.5	0.366409	0.216455	0.38472	18.6	47.5	55.6	0.0704103	0.0223468	0.422238
56.875	65.125	81.625	0.356237	0.268661	0.336438	50.8	60.7	68	0.358664	0.239881	0.343196	21.4	48.1	52.8	0.0826675	0.0254332	0.436095
57.75	64.375	90.5	0.36151	0.267038	0.371844	46	58	72.2	0.317188	0.211416	0.353669	23.4	47.6	52.5	0.082907	0.0235613	0.393749
55	61.375	89.75	0.331132	0.246351	0.368197	47.2	58.8	71.3	0.319383	0.217432	0.356994	22.1	46.2	55.8	0.0857419	0.0205275	0.455183
54.625	61.5	88	0.345976	0.237126	0.360011	51.7	58.6	74.4	0.35719	0.213526	0.372859	23.2	48	51.1	0.0876899	0.0235397	0.377061
59.375	62.625	87.625	0.36656	0.2575	0.349887	45.3	56.9	69.4	0.301124	0.208401	0.32367	22.7	47.1	55.7	0.0917711	0.0218421	0.426442
57.375	62.375	87.375	0.356661	0.248906	0.361425	47.7	59.9	67.1	0.330422	0.222874	0.326706	22.2	47.8	54	0.0831633	0.0237724	0.426603
53.375	62	81.25	0.333614	0.244185	0.334827	42.8	60.1	75.5	0.297825	0.225502	0.379653	21.9	48	54.4	0.0869616	0.0240936	0.420213
56.75	61	87.75	0.355633	0.241256	0.362807	53.1	60.4	68.5	0.399288	0.229788	0.336005	22	48.6	54	0.0874643	0.0239931	0.42824
55.625	62.5	90.625	0.354605	0.248837	0.36749	47	57.5	76.4	0.328196	0.215471	0.386188	22.7	46.8	50.9	0.0793724	0.0221765	0.370908
57.5	61.375	87.75	0.352068	0.240935	0.362621	48	58.1	75.3	0.342414	0.2131	0.358405	19.5	47.2	54.3	0.0786979	0.0226542	0.421212
