# Supplementary material for: Phosphoinositides regulate force-independent interactions between talin, vinculin, and actin
Source: eLife. 2020 Jul 13;9:e56110. doi: 10.7554/eLife.56110 (PMC7384861; doi:10.7554/eLife.56110)
Supplement: Figure 6—figure supplement 3—source data 1. [file elife-56110-fig6-figsupp3-data1.xlsx]

## Sheet: Sheet1
Post-bleach	TMR-PC (before_Tn2)			TMR-PC (after_Tn2)			Tn2-SNAP647
time (s)	A	B	C	A	B	C	A	B	C
0	0	0	0	0	0	0	0	0	0
10	0.335106	0.25293	0.321285	0.221344	0.221962	0.228932	0.187005	0.151924	0.155316
20	0.532677	0.397517	0.500415	0.315703	0.341547	0.354	0.256319	0.180453	0.302921
30	0.66174	0.516468	0.621102	0.394588	0.433974	0.446678	0.360511	0.260932	0.399805
40	0.749676	0.608105	0.706018	0.459786	0.515475	0.524438	0.412146	0.373701	0.561576
50	0.797515	0.676721	0.761683	0.513622	0.584097	0.593553	0.418139	0.384117	0.59047
60	0.802459	0.744353	0.801021	0.562788	0.640613	0.641815	0.42511	0.487675	0.596318
70	0.866982	0.810127	0.833138	0.60046	0.683031	0.688113	0.524644	0.546937	0.721026
80	0.89039	0.846412	0.857639	0.634727	0.713071	0.726624	0.525103	0.57508	0.716225
90	0.923721	0.875379	0.876859	0.664081	0.744465	0.75815	0.559484	0.661207	0.745721
100	0.935062	0.903414	0.898855	0.694688	0.77944	0.789873	0.582088	0.659144	0.716454
110	0.930857	0.934274	0.906698	0.717828	0.795009	0.818941	0.601	0.665906	0.810297
120	0.948007	0.944124	0.913351	0.733705	0.813562	0.8309	0.649301	0.661955	0.766982
130	0.956614	0.963467	0.925287	0.753857	0.835391	0.856375	0.676122	0.699098	0.871017
140	0.957393	0.972892	0.926234	0.769768	0.850856	0.880896	0.660288	0.655182	0.839958
150	0.961583	0.98954	0.933797	0.785399	0.851837	0.883676	0.671148	0.767627	0.804096
160	0.947523	1.01992	0.938191	0.792564	0.867923	0.893593	0.751	0.699777	0.878736
170	0.961993	1.01944	0.944178	0.805134	0.872477	0.904254	0.681555	0.822399	0.905545
180	0.980594	1.01646	0.934521	0.818483	0.883298	0.918054	0.749572	0.839898	0.99353
190	0.978701	1.08335	0.947019	0.821313	0.896445	0.931389	0.776277	0.773532	0.880711
200	0.981939	1.04271	0.944845	0.829329	0.89432	0.932449	0.766288	0.729107	0.83888
210	0.998174	1.03939	0.95523	0.82915	0.899436	0.931416	0.743194	0.721445	0.939185
220	0.98508	1.04402	0.951218	0.836467	0.903101	0.935955	0.839145	0.7548	0.897916
230	1.00098	1.05541	0.955939	0.840257	0.90882	0.944439	0.795122	0.7221	0.946488
240	0.991683	1.08177	0.956691	0.846748	0.907532	0.941763	0.72158	0.747854	0.857287
250	1.00695	1.04816	0.955898	0.845837	0.910013	0.957065	0.756208	0.901373	0.934083
260	0.993338	1.07598	0.955768	0.846312	0.913117	0.9586	0.795111	0.879369	1.01603
270	1.04593	1.05896	0.957808	0.85011	0.907083	0.963056	0.759564	0.793044	0.987823
280	1.0021	1.07939	0.956437	0.854394	0.916325	0.96198	0.892248	0.985494	1.00091
290	0.994721	1.06578	0.953407	0.852705	0.923403		0.816943	0.777437	0.901413
